# Supplementary material for: Ir-catalyzed asymmetric formal (3 + 2) cycloaddition of esters with vinylcyclopropanes
Source: Royal Society of Chemistry journal article supplement (doi:10.1039/d5ob01759a), 2025-12-03
Supplement: d5ob01759a1.pdf [file d5ob01759a1.pdf]

# **Ir-Catalyzed Asymmetric Formal (3+2) Cycloaddition of Esters with Vinylcyclopropanes**

Guorong Xiao, Mnegjiao Yang, and Duanyang Kong\*

State Key Laboratory of Chemical Resource Engineering, Beijing University of Chemical  
Technology, Beijing 100029, China

\* Corresponding author. Email: kongdy@buct.edu.cn

## **Contents**

|             |                                                                                                    |             |
|-------------|----------------------------------------------------------------------------------------------------|-------------|
| <b>I.</b>   | <b>General Considerations</b>                                                                      | <b>S-2</b>  |
| <b>II.</b>  | <b>General Procedure of Asymmetric Formal (3+2) Cycloaddition of Esters and Vinylcyclopropanes</b> | <b>S-2</b>  |
| <b>III.</b> | <b>Specific Experimental Details and Product Characterization Data</b>                             | <b>S-2</b>  |
| <b>IV.</b>  | <b>Additional Studies</b>                                                                          | <b>S-27</b> |
| <b>V.</b>   | <b>HPLC Chromatograms</b>                                                                          | <b>S-31</b> |
| <b>VI.</b>  | <b>NMR Spectra</b>                                                                                 | <b>S-70</b> |
| <b>VII.</b> | <b>References</b>                                                                                  | <b>S-93</b> |

## I. General Considerations

Unless noted, all reactions were conducted under inert atmosphere employing standard Schlenk technique or by the use of a N<sub>2</sub>-filled glovebox. All glassware was oven-dried prior to use. Flash chromatography was performed as described by Still and co-workers (SiliaFlash P60, 40-63 $\mu$ m, 60A silica gel, Silicycle).<sup>1</sup> Analytical thin-layer chromatography was performed using glass plates pre-coated with silica (SiliaPlate G TLC - Glass-Backed, 250 $\mu$ m, Silicycle). NMR spectra (<sup>1</sup>H, <sup>13</sup>C) were obtained on a Bruker AVANCE III 400 MHz spectrometer. The chemical shifts are given as parts per million (ppm) and were referenced to the residual solvent signal (CDCl<sub>3</sub>:  $\delta$ H = 7.26 ppm,  $\delta$ C = 77.16 ppm). HRMS analyses of compounds were performed on a Waters Xevo G2 Q-tof instrument (ESI) in positive or negative ionization mode. Specific Rotation was determined using an Autopol III Automatic polarimeter (Rudolph Research Analytical) and was reported as follows:  $[\alpha]_D^{25}$  (c in g per 100 mL solvent). All starting materials, reagents and solvents were purchased from commercial suppliers (Alfa, TCI, etc.) and used as supplied unless otherwise stated. The carboxylic esters were synthesized by condensation from the corresponding carboxylic acids and phenols as described by Smith and co-workers.<sup>2</sup> The vinylcyclopropanes were synthesized as described according to the literature procedure.<sup>3</sup>

## II. General Procedure of Asymmetric Formal (3+2) Cycloaddition of Esters and Vinylcyclopropanes

**General Procedure:** In an atmosphere-controlled glovebox carboxylic ester (0.2 mmol, 1.0 equiv.), vinylcyclopropane (0.4 mmol, 2.0 equiv.), **Ir-1** (0.002 mmol, 1.0 mol%) and DIPEA (0.2 mmol, 1.0 equiv.) were added to a 2-dram vial charged with a stir bar, followed by the addition of anhydrous DMA (2.0 mL). The vial was sealed with a PTFE-lined cap and removed from the glovebox. The reaction was stirred at room temperature for 4 hours. Then the mixture was quenched with H<sub>2</sub>O (10 mL) and extracted with EtOAc (3  $\times$  20 mL). The combined organic layers were washed sequentially with H<sub>2</sub>O (3  $\times$  20 mL) and saturated brine (3  $\times$  20 mL), dried over anhydrous Na<sub>2</sub>SO<sub>4</sub>, filtered, and concentrated *in vacuo*. The residue was purified by flash column chromatography on silica gel. The ee values were determined by HPLC using a Daicel chiral column.

## III. Specific Experimental Details and Product Characterization Data

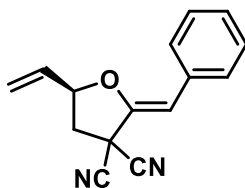

**3** prepared according to **General Procedure** from corresponding carboxylic ester (60.4 mg, 0.2 mmol, 1.0 equiv.), vinylcyclopropane (47.2 mg, 0.4 mmol, 2.0 equiv.), **Ir-1** (2.2 mg, 0.002 mmol, 1.0 mol%) and DIPEA (25.8 mg, 0.2 mmol, 1.0 equiv.) in DMA (2.0 mL). The reaction mixture was allowed to stir at room temperature for 4 hours. After purification by silica gel column chromatography (PE/EA = 10/1,  $R_f$  = 0.3), the desired product was obtained in 95% yield (44.9 mg) and 96% ee as an off-white solid. Spectroscopic data for **3** match those previously reported in the literature.<sup>3</sup>

**<sup>1</sup>H NMR** (CDCl<sub>3</sub>, 400 MHz)  $\delta$  7.59 (d,  $J$  = 7.5 Hz, 2H), 7.36 (t,  $J$  = 7.6 Hz, 2H), 7.26 (t,  $J$  = 7.3 Hz, 1H), 6.05 - 5.91 (m, 1H), 5.88 (s, 1H), 5.57 (d,  $J$  = 17.1 Hz, 1H), 5.46 (d,  $J$  = 10.4 Hz, 1H), 5.21 - 5.11 (m, 1H), 3.01 (dd,  $J$  = 12.9, 5.4 Hz, 1H), 2.58 (dd,  $J$  = 12.9, 9.2 Hz, 1H);

**Chiral HPLC:** Daicel Chiral pak IC column (1% IPA in hexanes, 1.0 mL/min),  $t_r$  = 16.8 min (major),  $t_r$  = 21.1 min (minor);

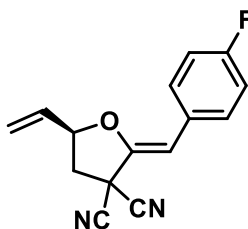

**4** prepared according to **General Procedure** from corresponding carboxylic ester (64.0 mg, 0.2 mmol, 1.0 equiv.), vinylcyclopropane (47.2 mg, 0.4 mmol, 2.0 equiv.), **Ir-1** (2.2 mg, 0.002 mmol, 1.0 mol%) and DIPEA (25.8 mg, 0.2 mmol, 1.0 equiv.) in DMA (2.0 mL). The reaction mixture was allowed to stir at room temperature for 4 hours. After purification by silica gel column chromatography (PE/EA = 10/1,  $R_f$  = 0.3), the desired product was obtained in 95% yield (48.3 mg) and 97% ee as an off-white solid. Spectroscopic data for **4** match those previously reported in the literature.<sup>3</sup>

**<sup>1</sup>H NMR** (CDCl<sub>3</sub>, 400 MHz)  $\delta$  7.63 - 7.54 (m, 2H), 7.09 - 7.00 (m, 2H), 6.03 - 5.89 (m, 1H), 5.84 (s, 1H), 5.57 (d,  $J$  = 17.1 Hz, 1H), 5.46 (d,  $J$  = 10.4 Hz, 1H), 5.20 - 5.10 (m, 1H), 3.02 (dd,  $J$  = 12.9, 5.4 Hz, 1H), 2.58 (dd,  $J$  = 12.9, 9.2 Hz, 1H);

**Chiral HPLC:** Daicel Chiral pak IC column (1% IPA in hexanes, 1.0 mL/min),  $t_r$  = 19.8 min (major),  $t_r$  = 24.7 min (minor);

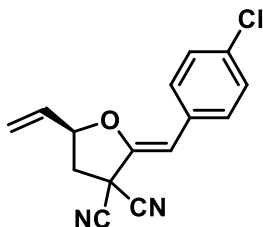

**5** prepared according to **General Procedure** from corresponding carboxylic ester (67.2 mg, 0.2 mmol, 1.0 equiv.), vinylcyclopropane (47.2 mg, 0.4 mmol, 2.0 equiv.), **Ir-1** (2.2 mg, 0.002 mmol, 1.0 mol%) and DIPEA (25.8 mg, 0.2 mmol, 1.0 equiv.) in DMA (2.0 mL). The reaction mixture was allowed to stir at room temperature for 4 hours. After purification by silica gel column chromatography (PE/EA = 10/1,  $R_f$  = 0.3), the desired product was obtained in 90% yield (48.6 mg) and 96% ee as an off-white solid. Spectroscopic data for **5** match those previously reported in the literature.<sup>3</sup>

<sup>1</sup>H NMR (CDCl<sub>3</sub>, 400 MHz)  $\delta$  7.52 (d,  $J$  = 8.6 Hz, 2H), 7.31 (d,  $J$  = 8.6 Hz, 2H), 6.04 - 5.91 (m, 1H), 5.83 (s, 1H), 5.57 (d,  $J$  = 17.1 Hz, 1H), 5.47 (d,  $J$  = 10.4 Hz, 1H), 5.23 - 5.13 (m, 1H), 3.02 (dd,  $J$  = 12.9, 5.4 Hz, 1H), 2.59 (dd,  $J$  = 12.9, 9.2 Hz, 1H);

**Chiral HPLC:** Daicel Chiral pak IC column (1% IPA in hexanes, 1.0 mL/min),  $t_r$  = 20.5 min (major),  $t_r$  = 25.4 min (minor);

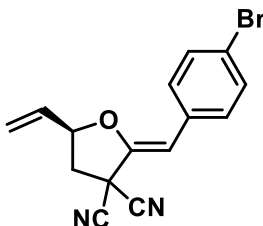

**6** prepared according to **General Procedure** from corresponding carboxylic ester (76.0 mg, 0.2 mmol, 1.0 equiv.), vinylcyclopropane (47.2 mg, 0.4 mmol, 2.0 equiv.), **Ir-1** (2.2 mg, 0.002 mmol, 1.0 mol%) and DIPEA (25.8 mg, 0.2 mmol, 1.0 equiv.) in DMA (2.0 mL). The reaction mixture was allowed to stir at room temperature for 4 hours. After purification by silica gel column chromatography (PE/EA = 10/1,  $R_f$  = 0.3), the desired product was obtained in 90% yield (56.5 mg) and 96% ee as an off-white solid. Spectroscopic data for **6** match those previously reported in the literature.<sup>3</sup>

<sup>1</sup>H NMR (CDCl<sub>3</sub>, 400 MHz)  $\delta$  7.50 - 7.43 (m, 4H), 6.02 - 5.91 (m, 1H), 5.82 (s, 1H), 5.56 (d,  $J$  = 17.1 Hz, 1H), 5.47 (d,  $J$  = 10.4 Hz, 1H), 5.22 - 5.13 (m, 1H), 3.02 (dd,  $J$  = 12.9, 5.4 Hz, 1H), 2.58 (dd,  $J$  = 12.9, 9.2 Hz, 1H);

**Chiral HPLC:** Daicel Chiral pak IC column (1% IPA in hexanes, 1.0 mL/min),  $t_r$  = 22.0 min (major),  $t_r$  = 27.1 min (minor));

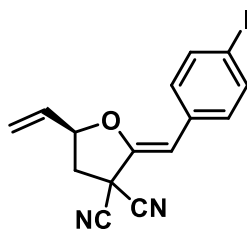

**7** prepared according to **General Procedure** from corresponding carboxylic ester (85.6 mg, 0.2 mmol, 1.0 equiv.), vinylcyclopropane (47.2 mg, 0.4 mmol, 2.0 equiv.), **Ir-1** (2.2 mg, 0.002 mmol, 1.0 mol%) and DIPEA (25.8 mg, 0.2 mmol, 1.0 equiv.) in DMA (2.0 mL). The reaction mixture was allowed to stir at room temperature for 4 hours. After purification by silica gel column chromatography (PE/EA = 10/1,  $R_f$  = 0.3), the desired product was obtained in 95% yield (68.8 mg) and 96% ee as an off-white solid. Spectroscopic data for **7** match those previously reported in the literature.<sup>3</sup>

**<sup>1</sup>H NMR** (CDCl<sub>3</sub>, 400 MHz)  $\delta$  7.67 (d,  $J$  = 8.4 Hz, 2H), 7.32 (d,  $J$  = 8.4 Hz, 2H), 6.00 - 5.90 (m, 1H), 5.80 (s, 1H), 5.56 (d,  $J$  = 17.1 Hz, 1H), 5.47 (d,  $J$  = 10.4 Hz, 1H), 5.21 - 5.13 (m, 1H), 3.02 (dd,  $J$  = 12.9, 5.4 Hz, 1H), 2.58 (dd,  $J$  = 12.9, 9.2 Hz, 1H);

**Chiral HPLC:** Daicel Chiral pak IC column (1% IPA in hexanes, 1.0 mL/min),  $t_r$  = 23.0 min (major),  $t_r$  = 28.5 min (minor);

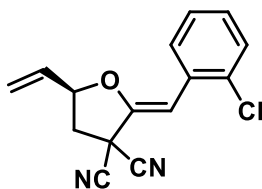

**8** prepared according to **General Procedure** from corresponding carboxylic ester (67.2 mg, 0.2 mmol, 1.0 equiv.), vinylcyclopropane (47.2 mg, 0.4 mmol, 2.0 equiv.), **Ir-1** (2.2 mg, 0.002 mmol, 1.0 mol%) and DIPEA (25.8 mg, 0.2 mmol, 1.0 equiv.) in DMA (2.0 mL). The reaction mixture was allowed to stir at room temperature for 4 hours. After purification by silica gel column chromatography (PE/EA = 10/1,  $R_f$  = 0.3), the desired product was obtained in 92% yield (49.7 mg) and 95% ee as an off-white solid. Spectroscopic data for **8** match those previously reported in the literature.<sup>3</sup>

**<sup>1</sup>H NMR** (CDCl<sub>3</sub>, 400 MHz) δ 7.96 (dd, *J* = 7.9, 1.6 Hz, 1H), 7.40 (dd, *J* = 7.9, 1.3 Hz, 1H), 7.26 - 7.23 (m, 1H), 7.18 (td, *J* = 7.7, 1.7 Hz, 1H), 6.36 (s, 1H), 6.01 - 5.91 (m, 1H), 5.56 (d, *J* = 17.1 Hz, 1H), 5.46 (d, *J* = 10.4 Hz, 1H), 5.23 - 5.13 (m, 1H), 3.04 (dd, *J* = 12.9, 5.4 Hz, 1H), 2.60 (dd, *J* = 12.9, 9.2 Hz, 1H);

**Chiral HPLC:** Daicel Chiral pak ID column (1% IPA in hexanes, 1.0 mL/min), *t<sub>r</sub>* = 11.2 min (major), *t<sub>r</sub>* = 10.1 min (minor);

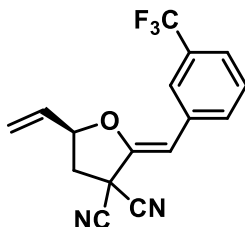

**9** prepared according to **General Procedure** from corresponding carboxylic ester (74.0 mg, 0.2 mmol, 1.0 equiv.), vinylcyclopropane (47.2 mg, 0.4 mmol, 2.0 equiv.), **Ir-1** (2.2 mg, 0.002 mmol, 1.0 mol%) and DIPEA (25.8 mg, 0.2 mmol, 1.0 equiv.) in DMA (2.0 mL). The reaction mixture was allowed to stir at room temperature for 4 hours. After purification by silica gel column chromatography (PE/EA = 10/1, *R<sub>f</sub>* = 0.3), the desired product was obtained in 87% yield (52.9 mg) and 96% ee as an off-white solid. Spectroscopic data for **9** match those previously reported in the literature.<sup>3</sup>

**<sup>1</sup>H NMR** (CDCl<sub>3</sub>, 400 MHz) δ 7.88 (s, 1H), 7.74 (d, *J* = 7.4 Hz, 1H), 7.55 - 7.46 (m, 2H), 6.04 - 5.91 (m, 2H), 5.58 (d, *J* = 17.1 Hz, 1H), 5.48 (d, *J* = 10.4 Hz, 1H), 5.25 - 5.19 (m, 1H), 3.05 (dd, *J* = 12.9, 5.4 Hz, 1H), 2.61 (dd, *J* = 12.9, 9.2 Hz, 1H);

**Chiral HPLC:** Daicel Chiral pak IC column (1% IPA in hexanes, 1.0 mL/min), *t<sub>r</sub>* = 15.5 min (major), *t<sub>r</sub>* = 19.0 min (minor);

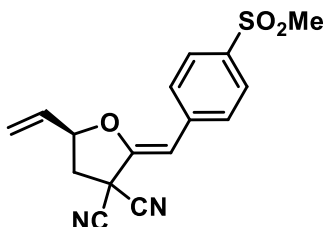

**10** prepared according to **General Procedure** from corresponding carboxylic ester (76.0 mg, 0.2 mmol, 1.0 equiv.), vinylcyclopropane (47.2 mg, 0.4 mmol, 2.0 equiv.), **Ir-1** (2.2 mg, 0.002 mmol, 1.0 mol%) and DIPEA (25.8 mg, 0.2 mmol, 1.0 equiv.) in DMA (2.0 mL). The

reaction mixture was allowed to stir at room temperature for 4 hours. After purification by silica gel column chromatography (PE/EA = 10/1,  $R_f$  = 0.3), the desired product was obtained in 41% yield (25.8 mg) and 89% ee as an off-white solid. Spectroscopic data for **10** match those previously reported in the literature.<sup>3</sup>

**<sup>1</sup>H NMR** (CDCl<sub>3</sub>, 400 MHz)  $\delta$  7.91 (d,  $J$  = 8.4 Hz, 2H), 7.76 (d,  $J$  = 8.4 Hz, 2H), 6.03 - 5.92 (m, 2H), 5.59 (d,  $J$  = 17.1 Hz, 1H), 5.51 (d,  $J$  = 10.4 Hz, 1H), 5.28 - 5.20 (m, 1H), 3.09 (d,  $J$  = 5.4 Hz, 1H), 3.05 (s, 3H), 2.63 (dd,  $J$  = 13.0, 9.2 Hz, 1H)

**Chiral HPLC:** Daicel Chiral pak IG column (30% IPA in hexanes, 1.0 mL/min),  $t_r$  = 29.9 min (major),  $t_r$  = 27.1 min (minor);

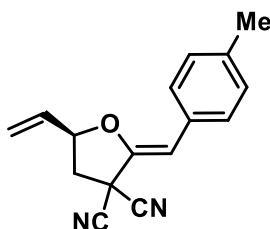

**11** prepared according to **General Procedure** from corresponding carboxylic ester (63.2 mg, 0.2 mmol, 1.0 equiv.), vinylcyclopropane (47.2 mg, 0.4 mmol, 2.0 equiv.), **Ir-1** (2.2 mg, 0.002 mmol, 1.0 mol%) and DIPEA (25.8 mg, 0.2 mmol, 1.0 equiv.) in DMA (2.0 mL). The reaction mixture was allowed to stir at room temperature for 4 hours. After purification by silica gel column chromatography (PE/EA = 10/1,  $R_f$  = 0.3), the desired product was obtained in 93% yield (46.5 mg) and 97% ee as an off-white solid. Spectroscopic data for **11** match those previously reported in the literature.<sup>3</sup>

**<sup>1</sup>H NMR** (CDCl<sub>3</sub>, 400 MHz)  $\delta$  7.48 (d,  $J$  = 8.1 Hz, 2H), 7.16 (d,  $J$  = 8.0 Hz, 2H), 6.03 - 5.91 (m, 1H), 5.85 (s, 1H), 5.56 (d,  $J$  = 17.1 Hz, 1H), 5.45 (d,  $J$  = 10.4 Hz, 1H), 5.19 - 5.10 (m, 1H), 3.00 (dd,  $J$  = 12.9, 5.4 Hz, 1H), 2.57 (dd,  $J$  = 12.8, 9.1 Hz, 1H), 2.35 (s, 3H);

**Chiral HPLC:** Daicel Chiral pak IC column (1% IPA in hexanes, 1.0 mL/min),  $t_r$  = 15.4 min (major),  $t_r$  = 19.3 min (minor);

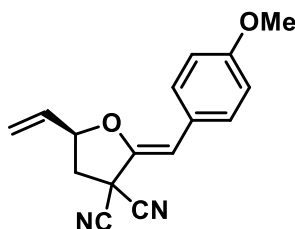

**12** prepared according to **General Procedure** from corresponding carboxylic ester (66.4 mg, 0.2 mmol, 1.0 equiv.), vinylcyclopropane (47.2 mg, 0.4 mmol, 2.0 equiv.), **Ir-1** (2.2 mg, 0.002 mmol, 1.0 mol%) and DIPEA (25.8 mg, 0.2 mmol, 1.0 equiv.) in DMA (2.0 mL). The reaction mixture was allowed to stir at room temperature for 4 hours. After purification by silica gel column chromatography (PE/EA = 10/1,  $R_f$  = 0.3), the desired product was obtained in 90% yield (47.9 mg) and 97% ee as an off-white solid. Spectroscopic data for **12** match those previously reported in the literature.<sup>3</sup>

**<sup>1</sup>H NMR** (CDCl<sub>3</sub>, 400 MHz)  $\delta$  7.48 (d,  $J$  = 8.1 Hz, 2H), 7.16 (d,  $J$  = 8.0 Hz, 2H), 6.02 - 5.90 (m, 1H), 5.85 (s, 1H), 5.56 (d,  $J$  = 17.1 Hz, 1H), 5.44 (d,  $J$  = 10.4 Hz, 1H), 5.19 - 5.09 (m, 1H), 3.04 - 2.97 (m, 1H), 2.57 (dd,  $J$  = 12.9, 9.1 Hz, 1H), 2.35 (s, 3H);

**Chiral HPLC:** Daicel Chiral pak IC column (1% IPA in hexanes, 1.0 mL/min),  $t_r$  = 30.4 min (major),  $t_r$  = 38.4 min (minor);

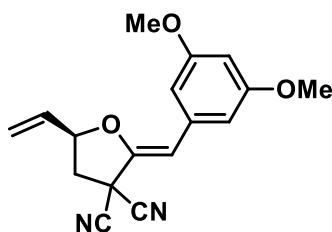

**13** prepared according to **General Procedure** from corresponding carboxylic ester (72.4 mg, 0.2 mmol, 1.0 equiv.), vinylcyclopropane (47.2 mg, 0.4 mmol, 2.0 equiv.), **Ir-1** (2.2 mg, 0.002 mmol, 1.0 mol%) and DIPEA (25.8 mg, 0.2 mmol, 1.0 equiv.) in DMA (2.0 mL). The reaction mixture was allowed to stir at room temperature for 4 hours. After purification by silica gel column chromatography (PE/EA = 10/1,  $R_f$  = 0.3), the desired product was obtained in 86% yield (50.9 mg) and 96% ee as an off-white solid. Spectroscopic data for **13** match those previously reported in the literature.<sup>3</sup>

**<sup>1</sup>H NMR** (CDCl<sub>3</sub>, 400 MHz)  $\delta$  6.77 (d,  $J$  = 2.2 Hz, 2H), 6.40 (t,  $J$  = 2.2 Hz, 1H), 6.01 - 5.91 (m, 1H), 5.81 (s, 1H), 5.56 (d,  $J$  = 17.1 Hz, 1H), 5.44 (d,  $J$  = 10.4 Hz, 1H), 5.21 - 5.12 (m, 1H), 3.80 (s, 6H), 3.01 (dd,  $J$  = 12.9, 5.4 Hz, 1H), 2.57 (dd,  $J$  = 12.9, 9.2 Hz, 1H);

**Chiral HPLC:** Daicel Chiral pak IC column (5% IPA in hexanes, 1.0 mL/min),  $t_r$  = 18.9 min (major),  $t_r$  = 21.4 min (minor);

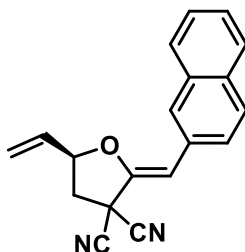

**14** prepared according to **General Procedure** from corresponding carboxylic ester (70.4 mg, 0.2 mmol, 1.0 equiv.), vinylcyclopropane (47.2 mg, 0.4 mmol, 2.0 equiv.), **Ir-1** (2.2 mg, 0.002 mmol, 1.0 mol%) and DIPEA (25.8 mg, 0.2 mmol, 1.0 equiv.) in DMA (2.0 mL). The reaction mixture was allowed to stir at room temperature for 4 hours. After purification by silica gel column chromatography (PE/EA = 10/1,  $R_f$  = 0.3), the desired product was obtained in 87% yield (49.8 mg) and 96% ee as an off-white solid. Spectroscopic data for **14** match those previously reported in the literature.<sup>3</sup>

**<sup>1</sup>H NMR** (CDCl<sub>3</sub>, 400 MHz)  $\delta$  8.03 (s, 1H), 7.86 - 7.79 (m, 3H), 7.75 (dd,  $J$  = 8.6, 1.6 Hz, 1H), 7.52 - 7.44 (m, 2H), 6.09 - 5.94 (m, 2H), 5.61 (d,  $J$  = 17.1 Hz, 1H), 5.48 (d,  $J$  = 10.4 Hz, 1H), 5.27 - 5.18 (m, 1H), 3.04 (dd,  $J$  = 12.9, 5.4 Hz, 1H), 2.62 (dd,  $J$  = 12.9, 9.1 Hz, 1H);

**Chiral HPLC:** Daicel Chiral pak IE column (1% IPA in hexanes, 1.0 mL/min),  $t_r$  = 19.2 min (major),  $t_r$  = 19.1 min (minor);

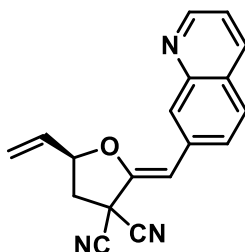

**15** prepared according to **General Procedure** from corresponding carboxylic ester (70.6 mg, 0.2 mmol, 1.0 equiv.), vinylcyclopropane (47.2 mg, 0.4 mmol, 2.0 equiv.), **Ir-1** (2.2 mg, 0.002 mmol, 1.0 mol%) and DIPEA (25.8 mg, 0.2 mmol, 1.0 equiv.) in DMA (2.0 mL). The reaction mixture was allowed to stir at room temperature for 4 hours. After purification by silica gel column chromatography (PE/EA = 10/1,  $R_f$  = 0.3), the desired product was obtained in 76% yield (43.6 mg) and 96% ee as an off-white solid. Spectroscopic data for **15** match those previously reported in the literature.<sup>3</sup>

**<sup>1</sup>H NMR** (CDCl<sub>3</sub>, 400 MHz)  $\delta$  8.89 (dd,  $J$  = 4.2, 1.6 Hz, 1H), 8.15 (d,  $J$  = 7.9 Hz, 1H), 8.10 - 8.04 (m, 1H), 8.04 - 7.96 (m, 2H), 7.41 (dd,  $J$  = 8.3, 4.2 Hz, 1H), 6.09 - 5.93 (m, 2H), 5.62 (d,  $J$  =

17.1 Hz, 1H), 5.51 (d,  $J$  = 10.4 Hz, 1H), 5.30 - 5.19 (m, 1H), 3.07 (dd,  $J$  = 12.9, 5.4 Hz, 1H), 2.64 (dd,  $J$  = 12.9, 9.2 Hz, 1H);

**Chiral HPLC:** Daicel Chiral pak IE column (10% IPA in hexanes, 1.0 mL/min),  $t_r$  = 27.5 min (major),  $t_r$  = 25.6 min (minor);

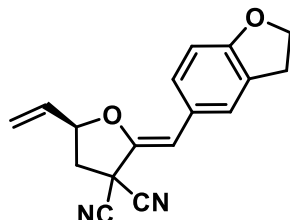

**16** prepared according to **General Procedure** from corresponding carboxylic ester (68.8 mg, 0.2 mmol, 1.0 equiv.), vinylcyclopropane (47.2 mg, 0.4 mmol, 2.0 equiv.), **Ir-1** (2.2 mg, 0.002 mmol, 1.0 mol%) and DIPEA (25.8 mg, 0.2 mmol, 1.0 equiv.) in DMA (2.0 mL). The reaction mixture was allowed to stir at room temperature for 4 hours. After purification by silica gel column chromatography (PE/EA = 8/1,  $R_f$  = 0.3), the desired product was obtained in 81% yield (45.1 mg) and 97% ee as an off-white solid. Spectroscopic data for **16** match those previously reported in the literature.<sup>3</sup>

**<sup>1</sup>H NMR** (CDCl<sub>3</sub>, 400 MHz)  $\delta$  7.47 (s, 1H), 7.34 (d,  $J$  = 8.3 Hz, 1H), 6.77 (d,  $J$  = 8.3 Hz, 1H), 6.01 - 5.91 (m, 1H), 5.81 (s, 1H), 5.56 (d,  $J$  = 17.1 Hz, 1H), 5.44 (d,  $J$  = 10.4 Hz, 1H), 5.16 - 5.09 (m, 1H), 4.59 (t,  $J$  = 8.7 Hz, 2H), 3.22 (t,  $J$  = 8.7 Hz, 2H), 2.99 (dd,  $J$  = 12.9, 5.4 Hz, 1H), 2.56 (dd,  $J$  = 12.9, 9.1 Hz, 1H);

**Chiral HPLC:** Daicel Chiral pak IC column (3% IPA in hexanes, 1.0 mL/min),  $t_r$  = 24.2 min (major),  $t_r$  = 28.7 min (minor);

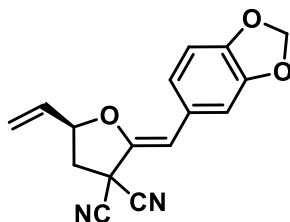

**17** prepared according to **General Procedure** from corresponding carboxylic ester (69.2 mg, 0.2 mmol, 1.0 equiv.), vinylcyclopropane (47.2 mg, 0.4 mmol, 2.0 equiv.), **Ir-1** (2.2 mg, 0.002 mmol, 1.0 mol%) and DIPEA (25.8 mg, 0.2 mmol, 1.0 equiv.) in DMA (2.0 mL). The reaction mixture was allowed to stir at room temperature for 4 hours. After purification by silica gel column chromatography (PE/EA = 8/1,  $R_f$  = 0.3), the desired product was obtained in

91% yield (51.0 mg) and 97% ee as an off-white solid. Spectroscopic data for **17** match those previously reported in the literature.<sup>3</sup>

**<sup>1</sup>H NMR** (CDCl<sub>3</sub>, 400 MHz)  $\delta$  7.24 (d,  $J$  = 1.5 Hz, 1H), 6.98 (dd,  $J$  = 8.1, 1.5 Hz, 1H), 6.79 (d,  $J$  = 8.1 Hz, 1H), 6.01 - 5.91 (m, 3H), 5.79 (s, 1H), 5.56 (d,  $J$  = 17.1 Hz, 1H), 5.45 (d,  $J$  = 10.4 Hz, 1H), 5.17 - 5.09 (m, 1H), 3.00 (dd,  $J$  = 12.9, 5.4 Hz, 1H), 2.57 (dd,  $J$  = 12.9, 9.1 Hz, 1H);

**Chiral HPLC:** Daicel Chiral pak IC column (1% IPA in hexanes, 1.0 mL/min),  $t_r$  = 36.4 min (major),  $t_r$  = 44.3 min (minor);

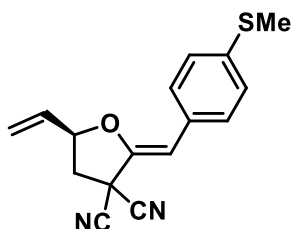

**18** prepared according to **General Procedure** from corresponding carboxylic ester (69.6 mg, 0.2 mmol, 1.0 equiv.), vinylcyclopropane (47.2 mg, 0.4 mmol, 2.0 equiv.), **Ir-1** (2.2 mg, 0.002 mmol, 1.0 mol%) and DIPEA (25.8 mg, 0.2 mmol, 1.0 equiv.) in DMA (2.0 mL). The reaction mixture was allowed to stir at room temperature for 4 hours. After purification by silica gel column chromatography (PE/EA = 10/1,  $R_f$  = 0.3), the desired product was obtained in 61% yield (34.4 mg) and 97% ee as an off-white solid. Spectroscopic data for **18** match those previously reported in the literature.<sup>3</sup>

**<sup>1</sup>H NMR** (CDCl<sub>3</sub>, 400 MHz)  $\delta$  7.51 (d,  $J$  = 8.5 Hz, 2H), 7.22 (d,  $J$  = 8.5 Hz, 2H), 6.00 - 5.91 (m, 1H), 5.83 (s, 1H), 5.56 (d,  $J$  = 17.1 Hz, 1H), 5.45 (d,  $J$  = 10.4 Hz, 1H), 5.19 - 5.12 (m, 1H), 3.01 (dd,  $J$  = 12.9, 5.4 Hz, 1H), 2.58 (dd,  $J$  = 12.9, 9.1 Hz, 1H), 2.49 (s, 3H);

**Chiral HPLC:** Daicel Chiral pak IC column (1% IPA in hexanes, 1.0 mL/min),  $t_r$  = 32.4 min (major),  $t_r$  = 40.3 min (minor);

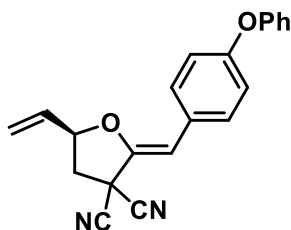

**19** prepared according to **General Procedure** from corresponding carboxylic ester (78.8 mg, 0.2 mmol, 1.0 equiv.), vinylcyclopropane (47.2 mg, 0.4 mmol, 2.0 equiv.), **Ir-1** (2.2 mg,

0.002 mmol, 1.0 mol%) and DIPEA (25.8 mg, 0.2 mmol, 1.0 equiv.) in DMA (2.0 mL). The reaction mixture was allowed to stir at room temperature for 4 hours. After purification by silica gel column chromatography (PE/EA = 10/1,  $R_f$  = 0.3), the desired product was obtained in 93% yield (61.0 mg) and 97% ee as an off-white solid. Spectroscopic data for **19** match those previously reported in the literature.<sup>3</sup>

**<sup>1</sup>H NMR** (CDCl<sub>3</sub>, 400 MHz)  $\delta$  7.56 (d,  $J$  = 8.7 Hz, 2H), 7.35 (t,  $J$  = 7.9 Hz, 2H), 7.12 (t,  $J$  = 7.4 Hz, 1H), 7.06 - 6.94 (m, 4H), 6.00 - 5.91 (m, 1H), 5.85 (s, 1H), 5.56 (d,  $J$  = 17.1 Hz, 1H), 5.45 (d,  $J$  = 10.4 Hz, 1H), 5.18 - 5.11 (m, 1H), 3.01 (dd,  $J$  = 12.9, 5.4 Hz, 1H), 2.58 (dd,  $J$  = 12.9, 9.2 Hz, 1H);

**Chiral HPLC:** Daicel Chiral pak IC column (1% IPA in hexanes, 1.0 mL/min),  $t_r$  = 28.2 min (major),  $t_r$  = 34.6 min (minor);

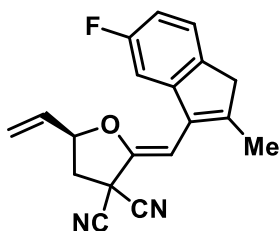

**20** prepared according to **General Procedure** from corresponding carboxylic ester (74.4 mg, 0.2 mmol, 1.0 equiv.), vinylcyclopropane (47.2 mg, 0.4 mmol, 2.0 equiv.), **Ir-1** (2.2 mg, 0.002 mmol, 1.0 mol%) and DIPEA (25.8 mg, 0.2 mmol, 1.0 equiv.) in DMA (2.0 mL). The reaction mixture was allowed to stir at room temperature for 4 hours. After purification by silica gel column chromatography (PE/EA = 10/1,  $R_f$  = 0.3), the desired product was obtained in 71% yield (43.5 mg) and 97% ee as an off-white solid. Spectroscopic data for **20** match those previously reported in the literature.<sup>3</sup>

**<sup>1</sup>H NMR** (CDCl<sub>3</sub>, 400 MHz)  $\delta$  7.30 - 7.26 (m, 1H), 7.01 (dd,  $J$  = 9.5, 2.3 Hz, 1H), 6.87 - 6.77 (m, 1H), 5.97 - 5.87 (m, 1H), 5.83 (s, 1H), 5.50 (d,  $J$  = 17.1 Hz, 1H), 5.41 (d,  $J$  = 10.4 Hz, 1H), 5.11 - 5.05 (m, 1H), 3.35 (s, 2H), 3.05 (dd,  $J$  = 12.9, 5.4 Hz, 1H), 2.62 (dd,  $J$  = 12.9, 9.3 Hz, 1H), 2.13 (s, 3H);

**Chiral HPLC:** Daicel Chiral pak IC column (1% IPA in hexanes, 1.0 mL/min),  $t_r$  = 20.1 min (major),  $t_r$  = 23.1 min (minor);

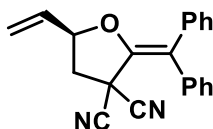

**21** prepared according to **General Procedure** from corresponding carboxylic ester (75.6 mg, 0.2 mmol, 1.0 equiv.), vinylcyclopropane (47.2 mg, 0.4 mmol, 2.0 equiv.), **Ir-1** (2.2 mg, 0.002 mmol, 1.0 mol%) and DIPEA (25.8 mg, 0.2 mmol, 1.0 equiv.) in DMA (2.0 mL). The reaction mixture was allowed to stir at room temperature for 4 hours. After purification by silica gel column chromatography (PE/EA = 10/1,  $R_f$  = 0.3), the desired product was obtained in 90% yield (56.2 mg) and >99% ee as an off-white solid. Spectroscopic data for **21** match those previously reported in the literature.<sup>3</sup>

<sup>1</sup>H NMR (CDCl<sub>3</sub>, 400 MHz)  $\delta$  7.55 - 7.36 (m, 7H), 7.30 (t,  $J$  = 7.4 Hz, 2H), 7.26 - 7.21 (m, 1H), 6.06 - 5.93 (m, 1H), 5.55 (d,  $J$  = 17.1 Hz, 1H), 5.45 (d,  $J$  = 10.4 Hz, 1H), 5.12 - 4.99 (m, 1H), 3.07 (dd,  $J$  = 12.8, 5.1 Hz, 1H), 2.67 (dd,  $J$  = 12.8, 9.7 Hz, 1H);

**Chiral HPLC:** Daicel Chiral pak ID column (1% IPA in hexanes, 1.0 mL/min),  $t_r$  = 14.8 min (major),  $t_r$  = 18.0 min (minor);

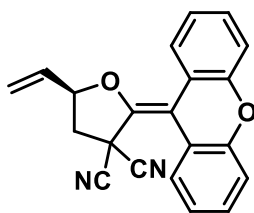

**22** prepared according to **General Procedure** from corresponding carboxylic ester (78.4 mg, 0.2 mmol, 1.0 equiv.), vinylcyclopropane (47.2 mg, 0.4 mmol, 2.0 equiv.), **Ir-1** (2.2 mg, 0.002 mmol, 1.0 mol%) and DIPEA (25.8 mg, 0.2 mmol, 1.0 equiv.) in DMA (2.0 mL). The reaction mixture was allowed to stir at room temperature for 4 hours. After purification by silica gel column chromatography (PE/EA = 8/1,  $R_f$  = 0.3), the desired product was obtained in 51% yield (33.3 mg) and 99% ee as an off-white solid. Spectroscopic data for **22** match those previously reported in the literature.<sup>3</sup>

<sup>1</sup>H NMR (CDCl<sub>3</sub>, 400 MHz)  $\delta$  7.94 (dd,  $J$  = 7.9, 1.5 Hz, 1H), 7.68 (dd,  $J$  = 7.7, 1.4 Hz, 1H), 7.41 - 7.36 (m, 1H), 7.33 - 7.26 (m, 2H), 7.25 - 7.13 (m, 3H), 5.96 - 5.86 (m, 1H), 5.55 (d,  $J$  = 17.1 Hz, 1H), 5.41 (d,  $J$  = 10.4 Hz, 1H), 5.18 (dt,  $J$  = 9.2, 6.0 Hz, 1H), 3.12 (dd,  $J$  = 12.9, 5.5 Hz, 1H), 2.60 (dd,  $J$  = 12.9, 9.2 Hz, 1H);

**Chiral HPLC:** Daicel Chiral pak IC column (1% IPA in hexanes, 1.0 mL/min),  $t_r$  = 18.2 min (major),  $t_r$  = 20.6 min (minor);

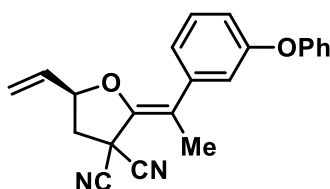

**23** prepared according to **General Procedure** from corresponding carboxylic ester (78.8 mg, 0.2 mmol, 1.0 equiv.), vinylcyclopropane (47.2 mg, 0.4 mmol, 2.0 equiv.), **Ir-1** (2.2 mg, 0.002 mmol, 1.0 mol%) and DIPEA (25.8 mg, 0.2 mmol, 1.0 equiv.) in DMA (2.0 mL). The reaction mixture was allowed to stir at room temperature for 4 hours. After purification by silica gel column chromatography (PE/EA = 10/1,  $R_f$  = 0.3), the desired product was obtained in 39% yield (26.7 mg), 98% ee and 9:1 Z/E as an off-white solid. Spectroscopic data for **23** match those previously reported in the literature.<sup>3</sup>

**<sup>1</sup>H NMR** (CDCl<sub>3</sub>, 400 MHz)  $\delta$  7.40 - 7.32 (m, 3H), 7.27 - 7.20 (m, 2H), 7.17 - 7.10 (m, 1H), 7.08 - 7.02 (m, 2H), 6.98 - 6.92 (m, 1H), 5.91 - 5.81 (m, 1H), 5.39 (dd,  $J$  = 17.3, 13.9 Hz, 2H), 4.90 - 4.82 (m, 1H), 3.10 (dd,  $J$  = 13.1, 5.5 Hz, 1H), 2.69 (dd,  $J$  = 13.1, 8.8 Hz, 1H), 2.30 (s, 3H);

**Chiral HPLC**: Daicel Chiral pak IC column (1% IPA in hexanes, 1.0 mL/min),  $t_r$  = 17.3 min (major),  $t_r$  = 20.2 min (minor);

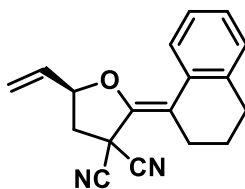

**24** prepared according to **General Procedure** from corresponding carboxylic ester (68.4 mg, 0.2 mmol, 1.0 equiv.), vinylcyclopropane (47.2 mg, 0.4 mmol, 2.0 equiv.), **Ir-1** (2.2 mg, 0.002 mmol, 1.0 mol%) and DIPEA (25.8 mg, 0.2 mmol, 1.0 equiv.) in DMA (2.0 mL). The reaction mixture was allowed to stir at room temperature for 4 hours. After purification by silica gel column chromatography (PE/EA = 10/1,  $R_f$  = 0.3), the desired product was obtained in 87% yield (48.0 mg) and 98% ee as an off-white solid.

**<sup>1</sup>H NMR** (CDCl<sub>3</sub>, 400 MHz)  $\delta$  8.10 - 8.03 (m, 1H), 7.21 - 7.13 (m, 3H), 6.00 - 5.90 (m, 1H), 5.51 (d,  $J$  = 17.2 Hz, 1H), 5.42 (d,  $J$  = 10.5 Hz, 1H), 4.96 - 4.89 (m, 1H), 3.10 (dd,  $J$  = 13.0, 5.4 Hz, 1H), 2.87 (t,  $J$  = 6.3 Hz, 2H), 2.74 - 2.67 (m, 3H), 2.05 - 1.97 (m, 2H);

**<sup>13</sup>C NMR** (CDCl<sub>3</sub>, 101 MHz)  $\delta$  140.1, 138.2, 133.1, 132.3, 129.3, 129.1, 127.6, 125.9, 120.4, 113.8, 113.6, 113.5, 81.0, 44.3, 35.8, 30.4, 28.6, 22.7;

**HRMS (ESI)**: Calcd for C<sub>18</sub>H<sub>17</sub>N<sub>2</sub>O [M+H]<sup>+</sup>: 277.1335, found 277.1333;

**Chiral HPLC:** Daicel Chiral pak IG column (1% IPA in hexanes, 1.0 mL/min),  $t_r$  = 19.0 min (major),  $t_r$  = 16.0 min (minor);

**Optical Rotation:**  $[\alpha]_D^{20} = -46.60$  ( $c = 1.0$ ,  $\text{CH}_2\text{Cl}_2$ ).

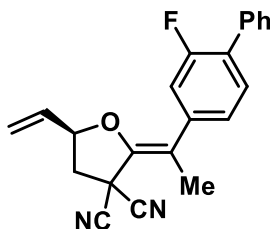

**25** prepared according to **General Procedure** from corresponding carboxylic ester (82.0 mg, 0.2 mmol, 1.0 equiv.), vinylcyclopropane (47.2 mg, 0.4 mmol, 2.0 equiv.), **Ir-1** (2.2 mg, 0.002 mmol, 1.0 mol%) and DIPEA (25.8 mg, 0.2 mmol, 1.0 equiv.) in DMA (2.0 mL). The reaction mixture was allowed to stir at room temperature for 4 hours. After purification by silica gel column chromatography (PE/EA = 10/1,  $R_f$  = 0.3), the desired product was obtained in 51% yield (35.1 mg) and 97% ee as an off-white solid. Spectroscopic data for **25** match those previously reported in the literature.<sup>3</sup>

**<sup>1</sup>H NMR** ( $\text{CDCl}_3$ , 400 MHz)  $\delta$  7.62 - 7.56 (m, 2H), 7.49 - 7.42 (m, 3H), 7.41 - 7.35 (m, 3H), 5.96 - 5.86 (m, 1H), 5.48 (d,  $J$  = 17.2 Hz, 1H), 5.41 (d,  $J$  = 10.5 Hz, 1H), 4.98 - 4.87 (m, 1H), 3.12 (dd,  $J$  = 13.1, 5.5 Hz, 1H), 2.72 (dd,  $J$  = 13.1, 8.7 Hz, 1H), 2.34 (s, 3H);

**Chiral HPLC:** Daicel Chiral pak IC column (1% IPA in hexanes, 1.0 mL/min),  $t_r$  = 18.1 min (major),  $t_r$  = 19.7 min (minor);

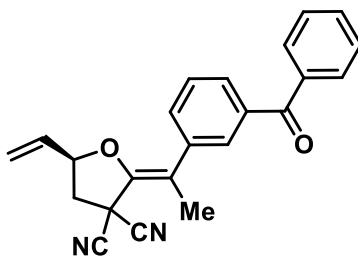

**26** prepared according to **General Procedure** from corresponding carboxylic ester (84.0 mg, 0.2 mmol, 1.0 equiv.), vinylcyclopropane (47.2 mg, 0.4 mmol, 2.0 equiv.), **Ir-1** (2.2 mg, 0.002 mmol, 1.0 mol%) and DIPEA (25.8 mg, 0.2 mmol, 1.0 equiv.) in DMA (2.0 mL). The reaction mixture was allowed to stir at room temperature for 4 hours. After purification by silica gel column chromatography (PE/EA = 8/1,  $R_f$  = 0.3), the desired product was obtained in

83% yield (58.8 mg) and 98% ee as an off-white solid. Spectroscopic data for **26** match those previously reported in the literature.<sup>3</sup>

**<sup>1</sup>H NMR** (CDCl<sub>3</sub>, 400 MHz)  $\delta$  7.95 (s, 1H), 7.89 - 7.80 (m, 2H), 7.75 - 7.68 (m, 2H), 7.63 - 7.57 (m, 1H), 7.52 - 7.45 (m, 3H), 5.96 - 5.81 (m, 1H), 5.39 (dd,  $J$  = 19.6, 13.8 Hz, 2H), 4.90 - 4.83 (m, 1H), 3.10 (dd,  $J$  = 13.1, 5.5 Hz, 1H), 2.69 (dd,  $J$  = 13.1, 8.8 Hz, 1H), 2.32 (s, 3H);

**Chiral HPLC:** Daicel Chiral pak IG column (5% IPA in hexanes, 1.0 mL/min),  $t_r$  = 48.1 min (major),  $t_r$  = 52.8 min (minor);

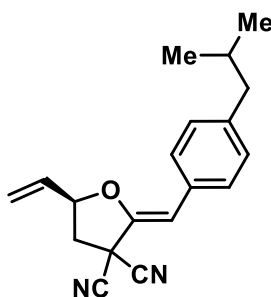

**27** prepared according to **General Procedure** from corresponding carboxylic ester (71.6 mg, 0.2 mmol, 1.0 equiv.), vinylcyclopropane (47.2 mg, 0.4 mmol, 2.0 equiv.), **Ir-1** (2.2 mg, 0.002 mmol, 1.0 mol%) and DIPEA (25.8 mg, 0.2 mmol, 1.0 equiv.) in DMA (2.0 mL). The reaction mixture was allowed to stir at room temperature for 4 hours. After purification by silica gel column chromatography (PE/EA = 10/1,  $R_f$  = 0.3), the desired product was obtained in 87% yield (50.8 mg) and 97% ee as an off-white solid. Spectroscopic data for **27** match those previously reported in the literature.<sup>3</sup>

**<sup>1</sup>H NMR** (CDCl<sub>3</sub>, 400 MHz)  $\delta$  7.50 (d,  $J$  = 8.1 Hz, 2H), 7.13 (d,  $J$  = 8.1 Hz, 2H), 6.01 - 5.91 (m, 1H), 5.86 (s, 1H), 5.57 (d,  $J$  = 17.1 Hz, 1H), 5.45 (d,  $J$  = 10.4 Hz, 1H), 5.18 - 5.11 (m, 1H), 3.00 (dd,  $J$  = 12.9, 5.4 Hz, 1H), 2.57 (dd,  $J$  = 12.9, 9.1 Hz, 1H), 2.47 (d,  $J$  = 7.2 Hz, 2H), 1.91 - 1.80 (m, 1H), 0.90 (d,  $J$  = 6.6 Hz, 6H);

**Chiral HPLC:** Daicel Chiral pak IG column (1% IPA in hexanes, 1.0 mL/min),  $t_r$  = 23.2 min (major),  $t_r$  = 17.0 min (minor);

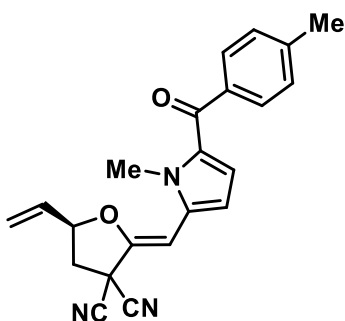

**28** prepared according to **General Procedure** from corresponding carboxylic ester (84.6 mg, 0.2 mmol, 1.0 equiv.), vinylcyclopropane (47.2 mg, 0.4 mmol, 2.0 equiv.), **Ir-1** (2.2 mg, 0.002 mmol, 1.0 mol%) and DIPEA (25.8 mg, 0.2 mmol, 1.0 equiv.) in DMA (2.0 mL). The reaction mixture was allowed to stir at room temperature for 4 hours. After purification by silica gel column chromatography (PE/EA = 5/1,  $R_f$  = 0.3), the desired product was obtained in 40% yield (28.6 mg) and 84% ee as an off-white solid. Spectroscopic data for **28** match those previously reported in the literature.<sup>3</sup>

**<sup>1</sup>H NMR** (CDCl<sub>3</sub>, 400 MHz)  $\delta$  7.71 (d,  $J$  = 7.9 Hz, 2H), 7.24 (s, 2H), 6.72 (d,  $J$  = 4.2 Hz, 1H), 6.66 (d,  $J$  = 4.2 Hz, 1H), 6.01 - 5.91 (m, 2H), 5.58 (d,  $J$  = 17.1 Hz, 1H), 5.47 (d,  $J$  = 10.4 Hz, 1H), 5.23 - 5.16 (m, 1H), 4.03 (s, 3H), 3.07 (dd,  $J$  = 12.9, 5.4 Hz, 1H), 2.63 (dd,  $J$  = 12.9, 9.2 Hz, 1H), 2.43 (s, 3H);

**Chiral HPLC:** Daicel Chiral pak IE column (10% IPA in hexanes, 1.0 mL/min),  $t_r$  = 41.5 min (major),  $t_r$  = 35.6 min (minor);

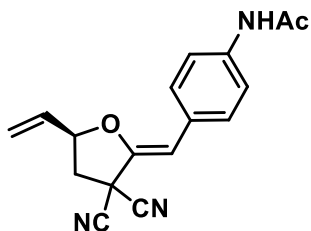

**29** prepared according to **General Procedure** from corresponding carboxylic ester (71.8 mg, 0.2 mmol, 1.0 equiv.), vinylcyclopropane (47.2 mg, 0.4 mmol, 2.0 equiv.), **Ir-1** (2.2 mg, 0.002 mmol, 1.0 mol%) and DIPEA (25.8 mg, 0.2 mmol, 1.0 equiv.) in DMA (2.0 mL). The reaction mixture was allowed to stir at room temperature for 4 hours. After purification by silica gel column chromatography (PE/EA = 5/1,  $R_f$  = 0.3), the desired product was obtained in 63% yield (36.9 mg) and 97% ee as an off-white solid. Spectroscopic data for **29** match those previously reported in the literature.<sup>3</sup>

**<sup>1</sup>H NMR** (CDCl<sub>3</sub>, 400 MHz) δ 7.59 - 7.47 (m, 4H), 7.26 (s, 1H), 6.01 - 5.91 (m, 1H), 5.82 (s, 1H), 5.56 (d, *J* = 17.1 Hz, 1H), 5.45 (d, *J* = 10.4 Hz, 1H), 5.19 - 5.12 (m, 1H), 3.01 (dd, *J* = 12.9, 5.4 Hz, 1H), 2.57 (dd, *J* = 12.9, 9.1 Hz, 1H), 2.18 (s, 3H)

**Chiral HPLC:** Daicel Chiral pak IE column (10% IPA in hexanes, 1.0 mL/min), *t<sub>r</sub>* = 17.1 min (major), *t<sub>r</sub>* = 14.5 min (minor);

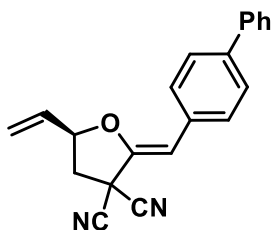

**30** prepared according to **General Procedure** from corresponding carboxylic ester (75.6 mg, 0.2 mmol, 1.0 equiv.), vinylcyclopropane (47.2 mg, 0.4 mmol, 2.0 equiv.), **Ir-1** (2.2 mg, 0.002 mmol, 1.0 mol%) and DIPEA (25.8 mg, 0.2 mmol, 1.0 equiv.) in DMA (2.0 mL). The reaction mixture was allowed to stir at room temperature for 4 hours. After purification by silica gel column chromatography (PE/EA = 10/1, *R<sub>f</sub>* = 0.3), the desired product was obtained in 90% yield (56.2 mg) and 97% ee as an off-white solid. Spectroscopic data for **30** match those previously reported in the literature.<sup>3</sup>

**<sup>1</sup>H NMR** (CDCl<sub>3</sub>, 400 MHz) δ 7.67 (d, *J* = 8.4 Hz, 2H), 7.64 - 7.58 (m, 4H), 7.45 (t, *J* = 7.6 Hz, 2H), 7.36 (t, *J* = 7.3 Hz, 1H), 6.05 - 5.91 (m, 2H), 5.59 (d, *J* = 17.1 Hz, 1H), 5.47 (d, *J* = 10.4 Hz, 1H), 5.26 - 5.14 (m, 1H), 3.03 (dd, *J* = 12.9, 5.4 Hz, 1H), 2.60 (dd, *J* = 12.9, 9.1 Hz, 1H);

**Chiral HPLC:** Daicel Chiral pak IC column (1% IPA in hexanes, 1.0 mL/min), *t<sub>r</sub>* = 32.8 min (major), *t<sub>r</sub>* = 39.2 min (minor);

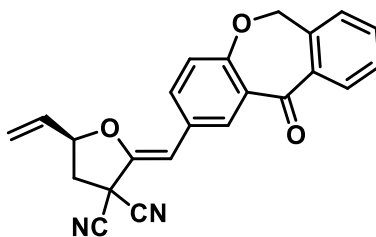

**31** prepared according to **General Procedure** from corresponding carboxylic ester (86.8 mg, 0.2 mmol, 1.0 equiv.), vinylcyclopropane (47.2 mg, 0.4 mmol, 2.0 equiv.), **Ir-1** (2.2 mg, 0.002 mmol, 1.0 mol%) and DIPEA (25.8 mg, 0.2 mmol, 1.0 equiv.) in DMA (2.0 mL). The reaction mixture was allowed to stir at room temperature for 4 hours. After purification by

silica gel column chromatography (PE/EA = 5/1,  $R_f$  = 0.3), the desired product was obtained in 83% yield (61.1 mg) and 98% ee as an off-white solid. Spectroscopic data for **31** match those previously reported in the literature.<sup>3</sup>

**<sup>1</sup>H NMR** (CDCl<sub>3</sub>, 400 MHz)  $\delta$  8.41 (d,  $J$  = 2.3 Hz, 1H), 7.90 (dd,  $J$  = 7.7, 0.9 Hz, 1H), 7.78 (dd,  $J$  = 8.6, 2.3 Hz, 1H), 7.61 - 7.55 (m, 1H), 7.51 - 7.46 (m, 1H), 7.38 (d,  $J$  = 7.2 Hz, 1H), 7.04 (d,  $J$  = 8.6 Hz, 1H), 6.04 - 5.94 (m, 1H), 5.91 (s, 1H), 5.60 (d,  $J$  = 17.1 Hz, 1H), 5.47 (d,  $J$  = 10.4 Hz, 1H), 5.23 - 5.16 (m, 3H), 3.03 (dd,  $J$  = 12.9, 5.4 Hz, 1H), 2.59 (dd,  $J$  = 12.9, 9.2 Hz, 1H);

**Chiral HPLC:** Daicel Chiral pak IC column (10% IPA in hexanes, 1.0 mL/min),  $t_r$  = 48.7 min (major),  $t_r$  = 45.4 min (minor);

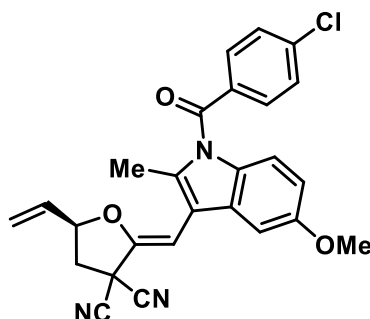

**32** prepared according to **General Procedure** from corresponding carboxylic ester (104.6 mg, 0.2 mmol, 1.0 equiv.), vinylcyclopropane (47.2 mg, 0.4 mmol, 2.0 equiv.), **Ir-1** (2.2 mg, 0.002 mmol, 1.0 mol%) and DIPEA (25.8 mg, 0.2 mmol, 1.0 equiv.) in DMA (2.0 mL). The reaction mixture was allowed to stir at room temperature for 4 hours. After purification by silica gel column chromatography (PE/EA = 5/1,  $R_f$  = 0.3), the desired product was obtained in 87% yield (79.5 mg) and 98% ee as an off-white solid. Spectroscopic data for **32** match those previously reported in the literature.<sup>3</sup>

**<sup>1</sup>H NMR** (CDCl<sub>3</sub>, 400 MHz)  $\delta$  7.67 (d,  $J$  = 8.4 Hz, 2H), 7.47 (d,  $J$  = 8.4 Hz, 2H), 7.09 (d,  $J$  = 2.4 Hz, 1H), 6.92 (d,  $J$  = 9.0 Hz, 1H), 6.70 (dd,  $J$  = 9.0, 2.5 Hz, 1H), 6.02 - 5.88 (m, 2H), 5.53 (d,  $J$  = 17.1 Hz, 1H), 5.43 (d,  $J$  = 10.4 Hz, 1H), 5.16 - 5.06 (m, 1H), 3.83 (s, 3H), 3.08 (dd,  $J$  = 12.9, 5.3 Hz, 1H), 2.66 (dd,  $J$  = 12.9, 9.3 Hz, 1H), 2.34 (s, 3H);

**Chiral HPLC:** Daicel Chiral pak IA column (10% IPA in hexanes, 1.0 mL/min),  $t_r$  = 24.1 min (major),  $t_r$  = 20.3 min (minor);

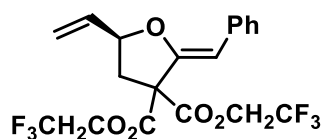

**33** prepared according to **General Procedure** from corresponding carboxylic ester (60.4 mg, 0.2 mmol, 1.0 equiv.), vinylcyclopropane (128.0 mg, 0.4 mmol, 2.0 equiv.), **Ir-1** (2.2 mg, 0.002 mmol, 1.0 mol%) and DIPEA (25.8 mg, 0.2 mmol, 1.0 equiv.) in DMA (2.0 mL). The reaction mixture was allowed to stir at room temperature for 4 hours. After purification by silica gel column chromatography (PE/EA = 10/1,  $R_f$  = 0.3), the desired product was obtained in 93% yield (81.5 mg) and 95% ee as an off-white solid. Spectroscopic data for **33** match those previously reported in the literature.<sup>3</sup>

<sup>1</sup>H NMR (CDCl<sub>3</sub>, 400 MHz)  $\delta$  7.60 (d,  $J$  = 7.7 Hz, 2H), 7.31 (t,  $J$  = 7.6 Hz, 2H), 7.18 (t,  $J$  = 7.3 Hz, 1H), 6.02 - 5.90 (m, 1H), 5.70 (s, 1H), 5.46 (d,  $J$  = 17.1 Hz, 1H), 5.32 (d,  $J$  = 10.4 Hz, 1H), 4.95 (dd,  $J$  = 14.8, 6.5 Hz, 1H), 4.68 - 4.54 (m, 4H), 2.94 (dd,  $J$  = 13.1, 5.9 Hz, 1H), 2.52 (dd,  $J$  = 12.9, 9.3 Hz, 1H);

**Chiral HPLC:** Daicel Chiral pak IA column (1% IPA in hexanes, 1.0 mL/min),  $t_r$  = 8.7 min (major),  $t_r$  = 7.9 min (minor);

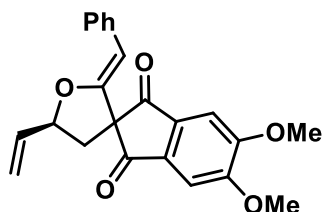

**34** prepared according to **General Procedure** from corresponding carboxylic ester (60.4 mg, 0.2 mmol, 1.0 equiv.), vinylcyclopropane (103.2 mg, 0.4 mmol, 2.0 equiv.), **Ir-1** (2.2 mg, 0.002 mmol, 1.0 mol%) and DIPEA (25.8 mg, 0.2 mmol, 1.0 equiv.) in DMA (2.0 mL). The reaction mixture was allowed to stir at room temperature for 4 hours. After purification by silica gel column chromatography (PE/EA = 10/1,  $R_f$  = 0.3), the desired product was obtained in 93% yield (70.0 mg) and 95% ee as an off-white solid.

<sup>1</sup>H NMR (CDCl<sub>3</sub>, 400 MHz)  $\delta$  7.43 (dd,  $J$  = 9.9, 5.1 Hz, 4H), 7.20 (t,  $J$  = 7.7 Hz, 2H), 7.07 (t,  $J$  = 7.4 Hz, 1H), 6.19 - 6.07 (m, 1H), 5.51 (d,  $J$  = 17.1 Hz, 1H), 5.41 - 5.31 (m, 2H), 4.62 (s, 1H), 4.07 (d,  $J$  = 5.6 Hz, 6H), 2.52 - 2.37 (m, 2H);

<sup>13</sup>C NMR (CDCl<sub>3</sub>, 101 MHz)  $\delta$  196.9, 196.59, 156.69, 156.5, 155.6, 138.2, 137.3, 136.4, 135.6, 128.2, 127.9, 125.8, 125.8, 118.6, 104.5, 104.2, 100.5, 84.4, 64.0, 57.0, 37.0;

**HRMS (ESI):** Calcd for C<sub>23</sub>H<sub>21</sub>O<sub>5</sub> [M+H]<sup>+</sup>: 377.1384, found 377.1385;

**Chiral HPLC:** Daicel Chiral pak IC column (10% IPA in hexanes, 1.0 mL/min),  $t_r$  = 12.9 min (major),  $t_r$  = 14.9 min (minor);

**Optical Rotation:**  $[\alpha]_D^{20} = -66.70$  ( $c = 1.0$ ,  $\text{CH}_2\text{Cl}_2$ ).

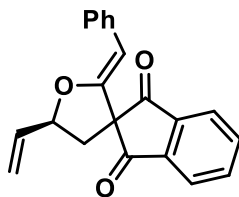

**35** prepared according to **General Procedure** from corresponding carboxylic ester (60.4 mg, 0.2 mmol, 1.0 equiv.), vinylcyclopropane (79.2 mg, 0.4 mmol, 2.0 equiv.), **Ir-1** (2.2 mg, 0.002 mmol, 1.0 mol%) and DIPEA (25.8 mg, 0.2 mmol, 1.0 equiv.) in DMA (2.0 mL). The reaction mixture was allowed to stir at room temperature for 4 hours. After purification by silica gel column chromatography (PE/EA = 10/1,  $R_f = 0.3$ ), the desired product was obtained in 93% yield (58.8 mg) and 97% ee as an off-white solid. Spectroscopic data for **35** match those previously reported in the literature.<sup>3</sup>

**<sup>1</sup>H NMR** ( $\text{CDCl}_3$ , 400 MHz)  $\delta$  8.17 - 8.07 (m, 2H), 7.99 - 7.92 (m, 2H), 7.44 - 7.37 (m, 2H), 7.20 (t,  $J = 7.7$  Hz, 2H), 7.07 (dd,  $J = 10.5, 4.2$  Hz, 1H), 6.19 - 6.08 (m, 1H), 5.52 (d,  $J = 17.1$  Hz, 1H), 5.42 - 5.34 (m, 2H), 4.57 (s, 1H), 2.54 (dd,  $J = 12.6, 6.2$  Hz, 1H), 2.45 (dd,  $J = 12.6, 9.4$  Hz, 1H);

**Chiral HPLC:** Daicel Chiral pak IC column (1% IPA in hexanes, 1.0 mL/min),  $t_r = 19.7$  min (major),  $t_r = 22.5$  min (minor);

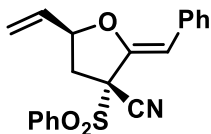

**36** prepared according to **General Procedure** from corresponding carboxylic ester (60.4 mg, 0.2 mmol, 1.0 equiv.), vinylcyclopropane (93.2 mg, 0.4 mmol, 2.0 equiv.), **Ir-1** (2.2 mg, 0.002 mmol, 1.0 mol%) and DIPEA (25.8 mg, 0.2 mmol, 1.0 equiv.) in DMA (2.0 mL). The reaction mixture was allowed to stir at room temperature for 4 hours. After purification by silica gel column chromatography (PE/EA = 10/1,  $R_f = 0.3$ ), the desired product was obtained in 73% yield (51.3 mg) and 97% ee as an off-white solid. Spectroscopic data for **36** match those previously reported in the literature.<sup>3</sup>

**<sup>1</sup>H NMR** ( $\text{CDCl}_3$ , 400 MHz)  $\delta$  8.02 (d,  $J = 7.5$  Hz, 2H), 7.86 - 7.80 (m, 1H), 7.63 (t,  $J = 7.8$  Hz, 2H), 7.42 - 7.40 (m, 1H), 7.30 (t,  $J = 7.6$  Hz, 3H), 7.21 (t,  $J = 7.3$  Hz, 1H), 5.98 - 5.90 (m, 1H), 5.52

(d,  $J = 17.1$  Hz, 1H), 5.38 (d,  $J = 10.3$  Hz, 1H), 5.34 - 5.29 (m, 1H), 4.92 (s, 1H), 3.36 (dd,  $J = 14.4$ , 6.0 Hz, 1H), 2.58 (dd,  $J = 14.3$ , 10.2 Hz, 1H);

**Chiral HPLC:** Daicel Chiral pak IA column (1% IPA in hexanes, 1.0 mL/min),  $t_r = 18.3$  min (major),  $t_r = 16.7$  min (minor);

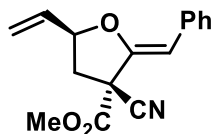

**37** prepared according to **General Procedure** from corresponding carboxylic ester (60.4 mg, 0.2 mmol, 1.0 equiv.), vinylcyclopropane (60.4 mg, 0.4 mmol, 2.0 equiv.), **Ir-1** (2.2 mg, 0.002 mmol, 1.0 mol%) and DIPEA (25.8 mg, 0.2 mmol, 1.0 equiv.) in DMA (2.0 mL). The reaction mixture was allowed to stir at room temperature for 4 hours. After purification by silica gel column chromatography (PE/EA = 10/1,  $R_f = 0.3$ ), the desired product was obtained in 73% yield (39.3 mg), 93% ee and 7:3 dr as an off-white solid. Spectroscopic data for **37** match those previously reported in the literature.<sup>3</sup>

**<sup>1</sup>H NMR** ( $\text{CDCl}_3$ , 400 MHz, 7:3 dr)  $\delta$  7.62 - 7.54 (m, 2H), 7.37 - 7.29 (m, 2H), 7.20 (t,  $J = 7.4$  Hz, 1H), 6.08 - 5.92 (m, 1H), 5.76 (s, 0.3H), 5.62 (s, 0.7H), 5.55 - 5.48 (m, 1H), 5.42 - 5.35 (m, 1H), 5.22 - 5.15 (m, 0.3H), 5.10 - 5.03 (m, 0.7H), 3.94 (s, 2.1H), 3.90 (s, 0.9H), 2.99 (dd,  $J = 12.9$ , 5.7 Hz, 0.3H), 2.80 - 2.73 (m, 1.4H), 2.37 (dd,  $J = 12.8$ , 9.6 Hz, 0.3H);

**Chiral HPLC:** Daicel Chiral pak IC column (1% IPA in hexanes, 1.0 mL/min),  $t_r = 20.7$  min (major),  $t_r = 18.1$  min (minor);

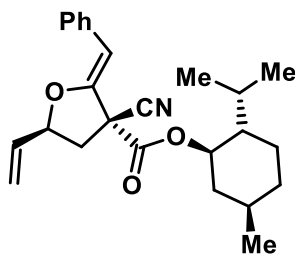

**38** prepared according to **General Procedure** from corresponding carboxylic ester (60.4 mg, 0.2 mmol, 1.0 equiv.), vinylcyclopropane (110.0 mg, 0.4 mmol, 2.0 equiv.), **Ir-1** (2.2 mg, 0.002 mmol, 1.0 mol%) and DIPEA (25.8 mg, 0.2 mmol, 1.0 equiv.) in DMA (2.0 mL). The reaction mixture was allowed to stir at room temperature for 4 hours. After purification by silica gel column chromatography (PE/EA = 10/1,  $R_f = 0.3$ ), the desired product was obtained in 56%

yield (44.0 mg) and 2:1 dr as an off-white solid. Spectroscopic data for **38** match those previously reported in the literature.<sup>3</sup>

<sup>1</sup>H NMR (CDCl<sub>3</sub>, 400 MHz)  $\delta$  7.54 (d,  $J$  = 7.4 Hz, 2H), 7.31 (t,  $J$  = 7.7 Hz, 2H), 7.19 (t,  $J$  = 7.4 Hz, 1H), 6.07 - 5.96 (m, 1H), 5.64 (s, 1H), 5.51 (d,  $J$  = 17.1 Hz, 1H), 5.38 (d,  $J$  = 10.4 Hz, 1H), 5.06 (dd,  $J$  = 15.3, 7.0 Hz, 1H), 4.83 (td,  $J$  = 10.9, 4.4 Hz, 1H), 2.78 - 2.70 (m, 2H), 2.09 - 2.04 (m, 1H), 2.00 - 1.92 (m, 1H), 1.77 - 1.70 (m, 2H), 1.62 - 1.56 (m, 1H), 1.53 - 1.47 (m, 1H), 1.28 - 1.25 (m, 1H), 1.16 - 1.06 (m, 2H), 0.93 (d,  $J$  = 6.5 Hz, 3H), 0.88 (d,  $J$  = 7.0 Hz, 3H), 0.76 (d,  $J$  = 7.0 Hz, 3H);

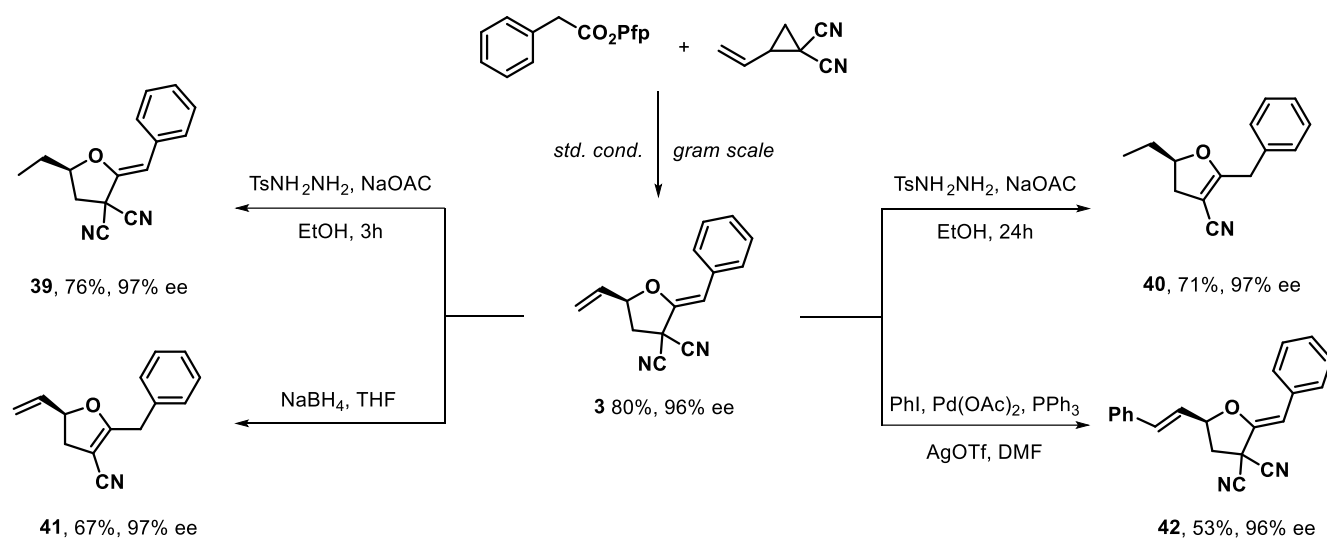

**Fig. S1.** Scale-up and synthetic applications.

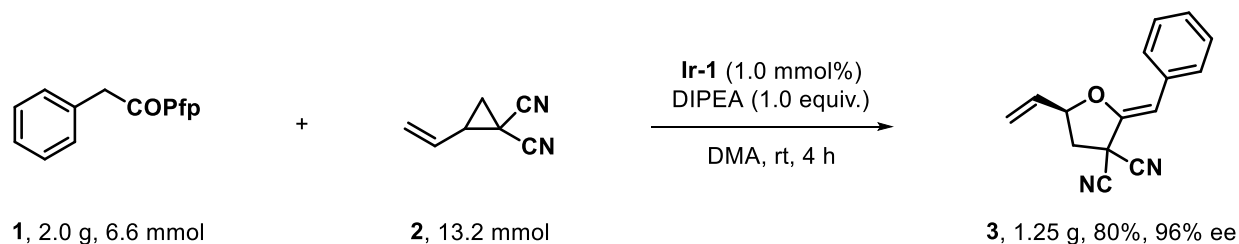

**3** prepared according to **General Procedure** from corresponding carboxylic ester (2.0 g, 6.6 mmol, 1.0 equiv.), vinylcyclopropane (1.56 g, 13.2 mmol, 2.0 equiv.), **Ir-1** (73.9 mg, 0.066 mmol, 1.0 mol%) and DIPEA (0.85 g, 6.6 mmol, 1.0 equiv.) in DMA (20 mL). The reaction mixture was allowed to stir at room temperature for 4 hours. After purification by silica gel column chromatography (PE/EA = 10/1,  $R_f$  = 0.3), the desired product was obtained in 80% yield (1.25 g) and 96% ee as an off-white solid.

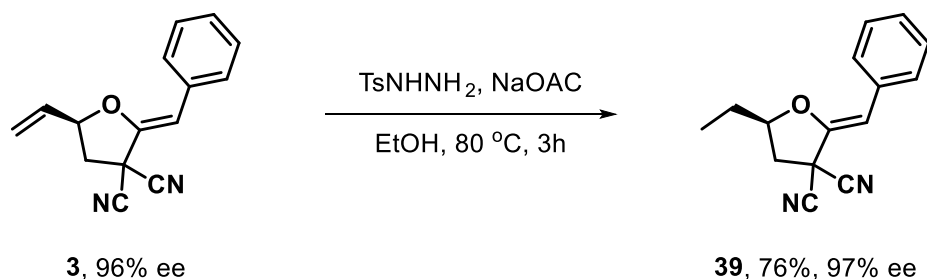

**3** (47.2 mg, 96% ee, 0.20 mmol, 1.0 equiv.), TsNHNH<sub>2</sub> (186.2 mg, 1.00 mmol, 5.0 equiv.) and NaOAc (82.0 mg, 1.00 mmol, 5.0 equiv.) were added to a 2-dram vial charged with a stir bar, followed by the addition of EtOH (2.0 mL). The resulting mixture was stirred at 80 °C under reflux for 3 hours. Upon completion of the reaction, H<sub>2</sub>O (10 mL) was added and the aqueous phase was extracted with ethyl acetate (3 × 20 mL). The combined organic phase was washed with brine (3 × 10 mL) and H<sub>2</sub>O (3 × 10 mL), dried over anhydrous Na<sub>2</sub>SO<sub>4</sub> and concentrated in vacuum. The residue was purified by silica gel column chromatography (PE/EA = 10/1, R<sub>f</sub> = 0.3) to give **39** in 76% yield (36.2 mg) and 97% ee as a colourless oil.

**<sup>1</sup>H NMR** (CDCl<sub>3</sub>, 400 MHz) δ 7.61 - 7.55 (m, 2H), 7.35 (t, *J* = 7.6 Hz, 2H), 7.26 - 7.22 (m, 1H), 5.83 (s, 1H), 4.71 - 4.63 (m, 1H), 2.95 (dd, *J* = 12.8, 5.0 Hz, 1H), 2.44 (dd, *J* = 12.8, 9.8 Hz, 1H), 1.99 - 1.81 (m, 2H), 1.13 (t, *J* = 7.5 Hz, 3H);

**<sup>13</sup>C NMR** (CDCl<sub>3</sub>, 101 MHz) δ 170.3, 133.6, 128.7, 128.5, 127.6, 113.7, 113.6, 104.3, 84.0, 42.2, 27.4, 10.0;

**HRMS (ESI):** Calcd for C<sub>15</sub>H<sub>15</sub>N<sub>2</sub>O [M+H]<sup>+</sup>: 239.1179, found 239.1178;

**Chiral HPLC:** Daicel Chiral pak IC column (1% IPA in hexanes, 1.0 mL/min), t<sub>r</sub> = 15.1 min (major), t<sub>r</sub> = 19.6 min (minor);

**Optical Rotation:** [α]<sub>D</sub><sup>20</sup> = -33.56 (c = 1.0, CH<sub>2</sub>Cl<sub>2</sub>).

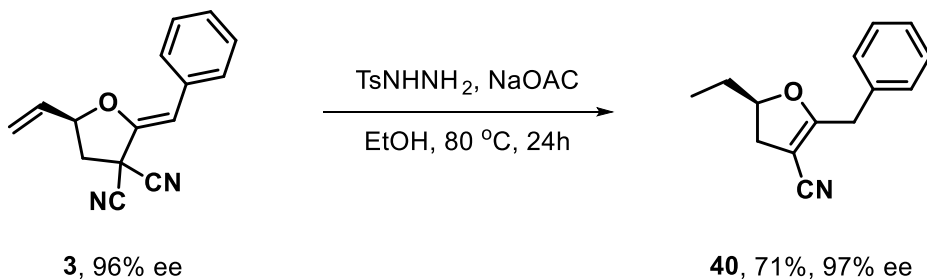

**3** (47.2 mg, 96% ee, 0.20 mmol, 1.0 equiv.), TsNHNH<sub>2</sub> (186.2 mg, 1.00 mmol, 5.0 equiv.) and NaOAc (82.0 mg, 1.00 mmol, 5.0 equiv.) were added to a 2-dram vial charged with a stir bar, followed by the addition of EtOH (2.0 mL). The resulting mixture was stirred at 80 °C under reflux for 24 hours. Upon completion of the reaction, H<sub>2</sub>O (10 mL) was added and the

aqueous phase was extracted with ethyl acetate (3 × 20 mL). The combined organic phase was washed with brine (3 × 10 mL) and H<sub>2</sub>O (3 × 10 mL), dried over anhydrous Na<sub>2</sub>SO<sub>4</sub> and concentrated in vacuum. The residue was purified by silica gel column chromatography (PE/EA = 10/1, R<sub>f</sub> = 0.3) to give **40** in 71% yield (30.3 mg) and 97% ee as a colourless oil.

**<sup>1</sup>H NMR** (CDCl<sub>3</sub>, 400 MHz) δ 7.35 - 7.26 (m, 5H), 4.71 - 4.62 (m, 1H), 3.73 - 3.62 (m, 2H), 2.95 (dd, *J* = 13.8, 10.1 Hz, 1H), 2.52 (dd, *J* = 13.9, 7.5 Hz, 1H), 1.72 - 1.59 (m, 2H), 0.89 (t, *J* = 7.4 Hz, 3H);

**<sup>13</sup>C NMR** (CDCl<sub>3</sub>, 101 MHz) δ 135.3, 129.0, 128.8, 127.3, 117.2, 85.8, 81.5, 35.1, 34.4, 28.7, 9.0;

**HRMS (ESI):** Calcd for C<sub>14</sub>H<sub>16</sub>NO [M+H]<sup>+</sup>: 214.1226, found 214.1225;

**Chiral HPLC:** Daicel Chiral pak IC column (1% IPA in hexanes, 1.0 mL/min), *t<sub>r</sub>* = 20.5 min (major), *t<sub>r</sub>* = 21.8 min (minor);

**Optical Rotation:** [α]<sub>D</sub><sup>20</sup> = + 26.34 (*c* = 1.0, CH<sub>2</sub>Cl<sub>2</sub>)

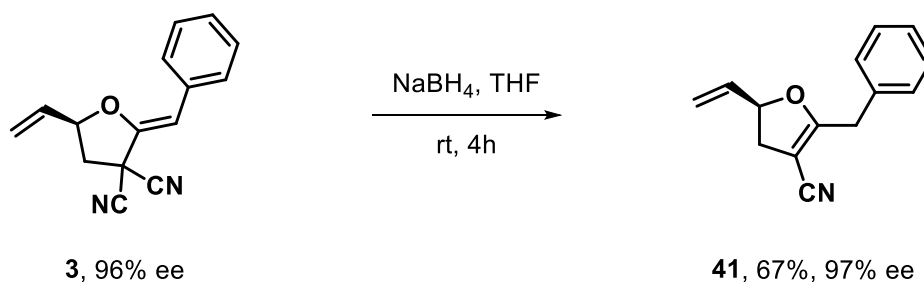

To a stirring solution of **3** (47.2 mg, 96% ee, 0.20 mmol, 1.0 equiv.) in THF (2.0 mL) was slowly added NaBH<sub>4</sub> (7.6 mg, 0.20 mmol, 1.0 equiv.) at 0 °C. The resulting mixture was stirred at room temperature for 4 hours. Upon completion of the reaction, H<sub>2</sub>O (10 mL) was added and the aqueous phase was extracted with ethyl acetate (3 × 20 mL). The combined organic phase was washed with brine (3 × 10 mL) and H<sub>2</sub>O (3 × 10 mL), dried over anhydrous Na<sub>2</sub>SO<sub>4</sub> and concentrated in vacuum. The residue was purified by silica gel column chromatography (PE/EA = 10/1, R<sub>f</sub> = 0.3) to give **41** in 67% yield (28.3 mg) and 97% ee as a colourless oil.

**<sup>1</sup>H NMR** (CDCl<sub>3</sub>, 400 MHz) δ 7.37 - 7.26 (m, 5H), 5.90 - 5.79 (m, 1H), 5.24 - 5.10 (m, 3H), 3.72 - 3.64 (m, 2H), 3.07 (dd, *J* = 14.0, 10.4 Hz, 1H), 2.66 (dd, *J* = 14.0, 7.7 Hz, 1H);

**<sup>13</sup>C NMR** (CDCl<sub>3</sub>, 101 MHz) δ 172.1, 135.7, 135.1, 129.0, 128.9, 127.4, 117.7, 84.4, 81.7, 36.0, 34.4;

**HRMS (ESI):** Calcd for C<sub>14</sub>H<sub>14</sub>NO [M+H]<sup>+</sup>: 212.1070, found 212.1071;

**Chiral HPLC:** Daicel Chiral pak IG column (5% IPA in hexanes, 1.0 mL/min),  $t_r$  = 9.4 min (major),  $t_r$  = 8.7 min (minor);

**Optical Rotation:**  $[\alpha]_D^{20} = -55.34$  ( $c = 1.0$ ,  $\text{CH}_2\text{Cl}_2$ ).

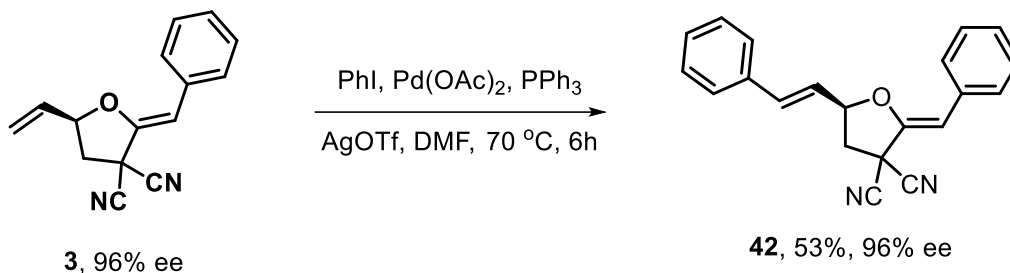

In an atmosphere-controlled glovebox **3** (70.8 mg, 96% ee, 0.3 mmol, 1.0 equiv.), PhI (183.5 mg, 0.9 mmol, 3.0 equiv.),  $\text{Pd}(\text{OAc})_2$  (6.7 mg, 0.03 mmol, 10 mol%),  $\text{PPh}_3$  (15.7 mg, 0.06 mmol, 20 mol%) and AgOTf (154.1 mg, 0.6 mmol, 2.0 equiv.) were added to a 2-dram vial charged with a stir bar, followed by the addition of anhydrous DMF (3.0 mL). The vial was sealed with a PTFE-lined cap and removed from the glovebox. The reaction was stirred at 70 °C for 6 hours. Then the mixture was quenched with  $\text{H}_2\text{O}$  (10 mL) and extracted with EtOAc ( $3 \times 20$  mL). The combined organic layers were washed sequentially with  $\text{H}_2\text{O}$  ( $3 \times 10$  mL) and saturated brine ( $3 \times 10$  mL), dried over anhydrous  $\text{Na}_2\text{SO}_4$ , filtered, and concentrated *in vacuo*. The residue was purified by silica gel column chromatography (PE/EA = 10/1,  $R_f$  = 0.3) to give **42** in 53% yield (49.6 mg) and 96% ee as an off-white solid.

**$^1\text{H}$  NMR** ( $\text{CDCl}_3$ , 400 MHz)  $\delta$  7.61 (d,  $J$  = 7.5 Hz, 2H), 7.47 - 7.42 (m, 2H), 7.40 - 7.31 (m, 5H), 7.27 - 7.26 (m, 1H), 6.85 (d,  $J$  = 15.8 Hz, 1H), 6.25 (dd,  $J$  = 15.8, 7.6 Hz, 1H), 5.90 (s, 1H), 5.37 - 5.30 (m, 1H), 3.08 (dd,  $J$  = 12.9, 5.2 Hz, 1H), 2.67 (dd,  $J$  = 12.9, 9.5 Hz, 1H);

**$^{13}\text{C}$  NMR** ( $\text{CDCl}_3$ , 101 MHz)  $\delta$  146.1, 136.5, 135.1, 133.4, 129.2, 129.0, 128.7, 128.7, 127.7, 127.2, 123.3, 113.5, 104.8, 83.2, 43.0, 38.4;

**HRMS (ESI):** Calcd for  $\text{C}_{21}\text{H}_{17}\text{N}_2\text{O}$   $[\text{M}+\text{H}]^+$ : 313.1335, found 313.1336;

**Chiral HPLC:** Daicel Chiral pak IA column (5% IPA in hexanes, 1.0 mL/min),  $t_r$  = 10.2 min (major),  $t_r$  = 9.2 min (minor);

**Optical Rotation:**  $[\alpha]_D^{20} = -66.77$  ( $c = 1.0$ ,  $\text{CH}_2\text{Cl}_2$ ).

## IV. Additional Studies

**Table S1.** Screening of ligands

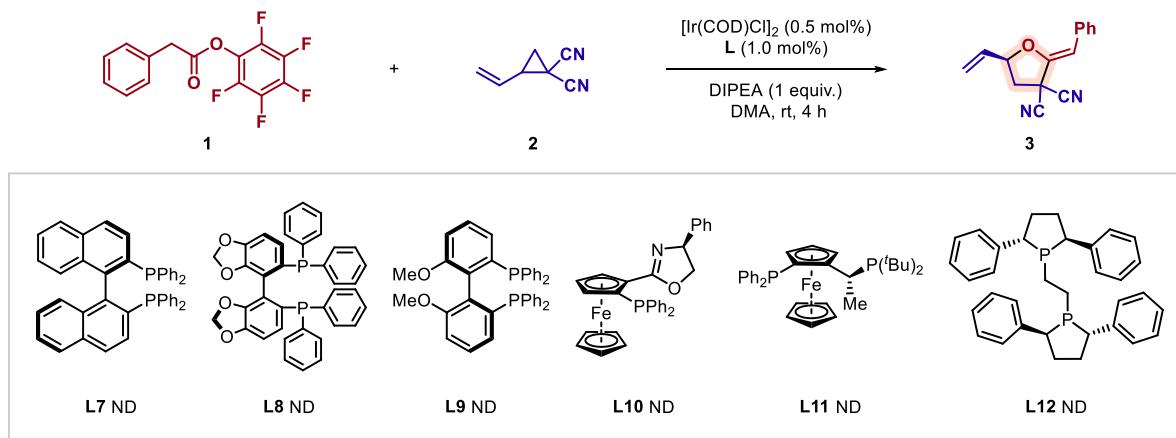

Reaction conditions: **1** (0.2 mmol, 1.0 equiv.), **2** (0.4 mmol, 2.0 equiv.),  $[\text{Ir}(\text{COD})\text{Cl}]_2$  (0.5 mol%), **L** (1.0 mol%), DIPEA (0.2 mmol, 1.0 equiv.), DMA (2.0 mL), room temperature, 4 h. Isolated yield. The enantiomeric excess (ee) was determined by HPLC analysis.

**Table S2.** Solvent effect in the (3+2) cycloaddition of **1** and **2**

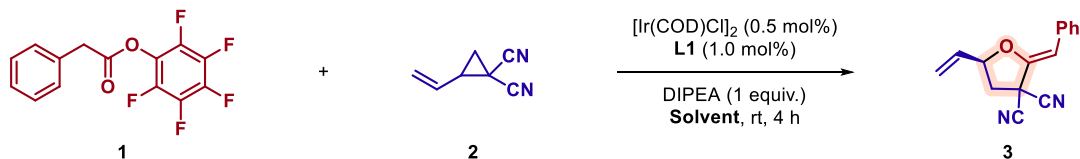

| Entry | Solvent           | yield (%) <sup>a</sup> | ee (%) <sup>b</sup> |
|-------|-------------------|------------------------|---------------------|
| 1     | none              | 80                     | 96                  |
| 2     | DMSO              | 61                     | 91                  |
| 3     | MeCN              | 53                     | 96                  |
| 4     | DCM               | ND                     | /                   |
| 5     | PhMe              | ND                     | /                   |
| 6     | 1,4-dioxane       | ND                     | /                   |
| 7     | Et <sub>2</sub> O | ND                     | /                   |

Reaction conditions: **1** (0.2 mmol, 1.0 equiv.), **2** (0.4 mmol, 2.0 equiv.),  $[\text{Ir}(\text{COD})\text{Cl}]_2$  (0.5 mol%), **L1** (1.0 mol%), DIPEA (0.2 mmol, 1.0 equiv.), **Solvent** (2.0 mL), room temperature, 4 h. <sup>a</sup> Isolated yield. <sup>b</sup> The enantiomeric excess (ee) was determined by HPLC analysis.

**Table S3.** Effect of base in the (3+2) cycloaddition of **1** and **2**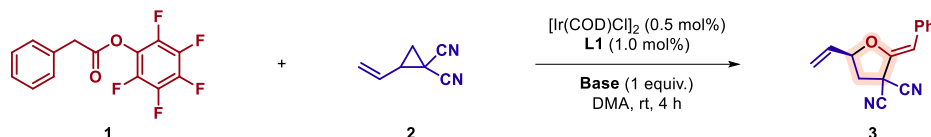

| Entry | Base                            | yield (%) <sup>a</sup> | ee (%) <sup>b</sup> |
|-------|---------------------------------|------------------------|---------------------|
| 1     | none                            | 80                     | 96                  |
| 2     | DBU                             | 55                     | 96                  |
| 3     | Pyridine                        | 21                     | 96                  |
| 4     | K <sub>3</sub> PO <sub>4</sub>  | ND                     | /                   |
| 5     | <sup>t</sup> BuOK               | ND                     | /                   |
| 6     | Cs <sub>2</sub> CO <sub>3</sub> | ND                     | /                   |
| 7     | KOH                             | ND                     | /                   |
| 8     | Na <sub>2</sub> CO <sub>3</sub> | ND                     | /                   |

Reaction conditions: **1** (0.2 mmol, 1.0 equiv.), **2** (0.4 mmol, 2.0 equiv.), [Ir(COD)Cl]<sub>2</sub> (0.5 mol%), **L1** (1.0 mol%), **Base** (0.2 mmol, 1.0 equiv.), DMA (2.0 mL), room temperature, 4 h. <sup>a</sup> Isolated yield. <sup>b</sup> The enantiomeric excess (ee) was determined by HPLC analysis.

**Table S4.** Effect of iridium precursors in the (3+2) cycloaddition of **1** and **2**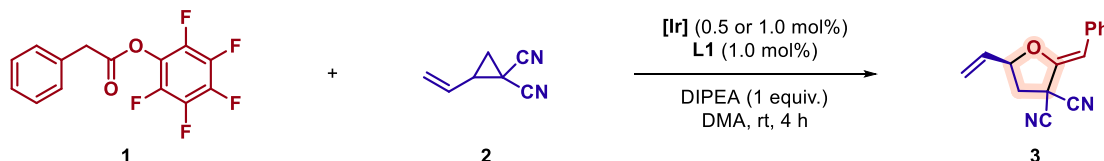

| Entry | [Ir]                                  | yield (%) <sup>a</sup> | ee (%) <sup>b</sup> |
|-------|---------------------------------------|------------------------|---------------------|
| 1     | [Ir(COD)Cl] <sub>2</sub>              | 80                     | 96                  |
| 2     | Ir(COD) <sub>2</sub> BF <sub>4</sub>  | 72                     | 96                  |
| 3     | [Ir(COD)OMe] <sub>2</sub>             | 0                      | -                   |
| 4     | Ir(COD) <sub>2</sub> BAr <sub>4</sub> | 0                      | -                   |

Reaction conditions: **1** (0.2 mmol, 1.0 equiv.), **2** (0.4 mmol, 2.0 equiv.), [**Ir**] (0.5 or 1.0 mol%), **L1** (1.0 mol%), DIPEA (0.2 mmol, 1.0 equiv.), DMA (2.0 mL), room temperature, 4 h. <sup>a</sup> Isolated yield. <sup>b</sup> The enantiomeric excess (ee) was determined by HPLC analysis.

**Table S5.** Effect of chiral isothioureia organocatalyst in the (3+2) cycloaddition

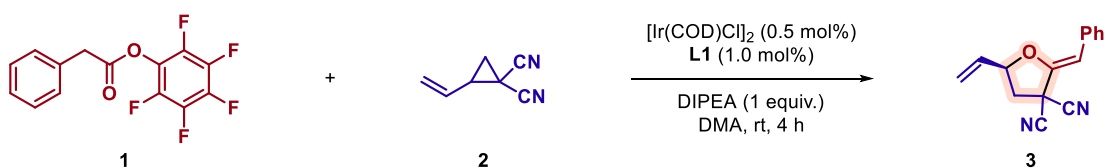

| Entry | Variation                                           | yield (%) <sup>a</sup> | ee (%) <sup>b</sup> |
|-------|-----------------------------------------------------|------------------------|---------------------|
| 1     | none                                                | 80                     | 96                  |
| 2     | add 10 mol% ( <b>S</b> )-BTM                        | 76                     | 96                  |
| 3     | 10 mol% ( <b>S</b> )-BTM instead of 1 equiv. DIPEA  | 10                     | 96                  |
| 4     | 1 equiv. ( <b>S</b> )-BTM instead of 1 equiv. DIPEA | 10                     | 96                  |

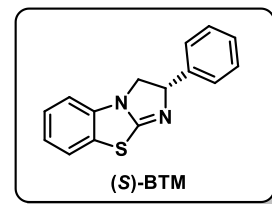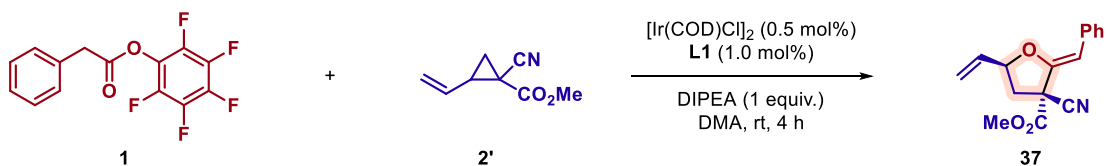

| Entry | Variation                                           | yield (%) <sup>a</sup> | ee (%) <sup>b</sup> | dr  |
|-------|-----------------------------------------------------|------------------------|---------------------|-----|
| 1     | none                                                | 73                     | 93                  | 2:1 |
| 2     | add 10 mmol% ( <b>S</b> )-BTM                       | 70                     | 93                  | 2:1 |
| 3     | add 10 mmol% ( <b>R</b> )-BTM                       | 70                     | 93                  | 2:1 |
| 4     | 10 mmol% ( <b>S</b> )-BTM instead of 1 equiv. DIPEA | 0                      | -                   | -   |
| 5     | 10 mmol% ( <b>R</b> )-BTM instead of 1 equiv. DIPEA | 0                      | -                   | -   |
| 6     | 1 equiv. ( <b>S</b> )-BTM instead of 1 equiv. DIPEA | 0                      | -                   | -   |
| 7     | 1 equiv. ( <b>R</b> )-BTM instead of 1 equiv. DIPEA | 0                      | -                   | -   |

Reaction conditions: **1** (0.2 mmol, 1.0 equiv.), **2** (0.4 mmol, 2.0 equiv.),  $[\text{Ir}(\text{COD})\text{Cl}]_2$  (0.5 mol%), **L1** (1.0 mol%), DIPEA (0.2 mmol, 1.0 equiv.), DMA (2.0 mL), room temperature, 4 h. <sup>a</sup> Isolated yield. <sup>b</sup> The enantiomeric excess (ee) was determined by HPLC analysis.

**Table S6.** Unsuccessful examples

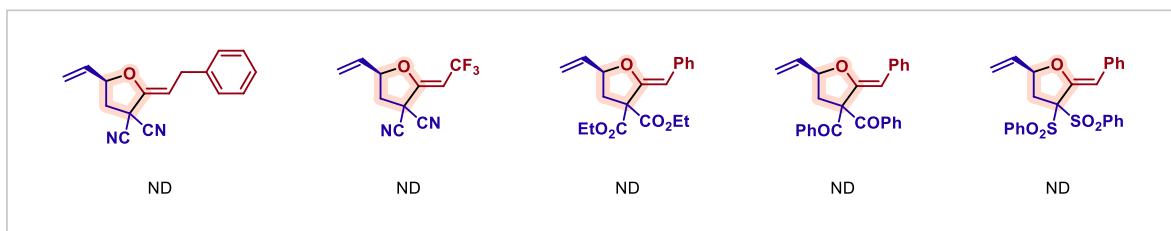

Reaction conditions: **1** (0.2 mmol, 1.0 equiv.), **2** (0.4 mmol, 2.0 equiv.), **Ir-1** (1.0 mol%), DIPEA (0.2 mmol, 1.0 equiv.), DMA (2.0 mL), room temperature, 4 h.

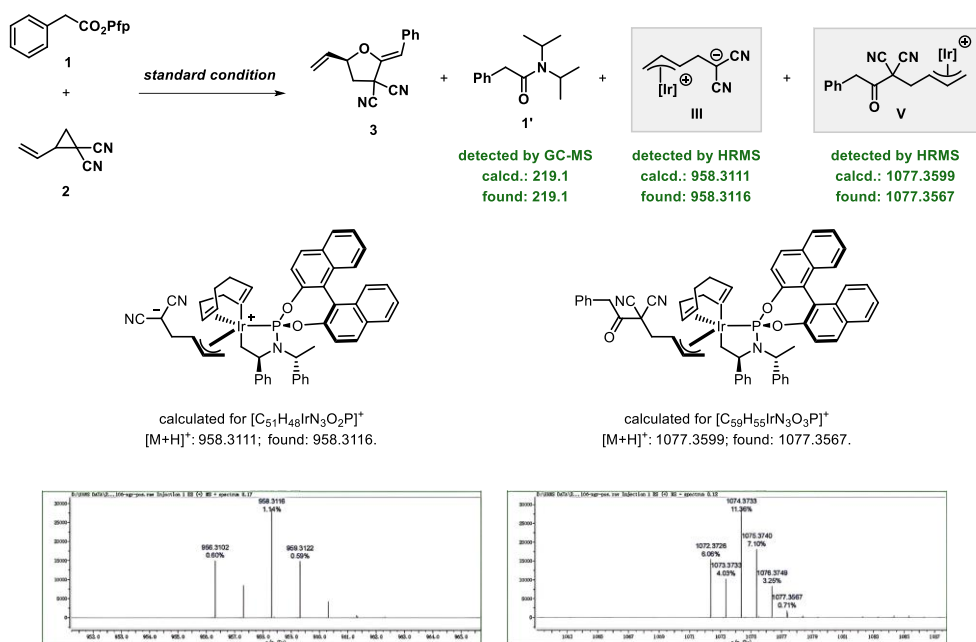

**Fig. S2** Verification of intermediates.

In a  $N_2$ -filled glovebox, an oven-dried vial (1 dram) equipped with a magnet stir bar was charged with carboxylic ester (0.1 mmol, 1.0 equiv.), vinylcyclopropane (0.2 mmol, 2.0 equiv.), **Ir-1** (0.001 mmol, 1.0 mmol%), DIPEA (0.1 mmol, 1.0 equiv.) and dry DMA (0.1 M). The reaction mixture was stirred at room temperature for 10 min. The reaction system was subjected to HRMS and GC-MS analysis *in situ*.

## V. HPLC Chromatograms

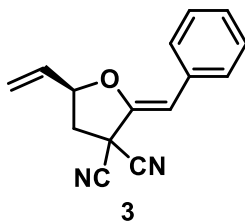

**Chiral HPLC:** 96% ee, Daicel Chiral pak IC column (1% IPA in hexanes, 1.0 mL/min),  $t_r$  = 16.8 min (major),  $t_r$  = 21.1 min (minor);

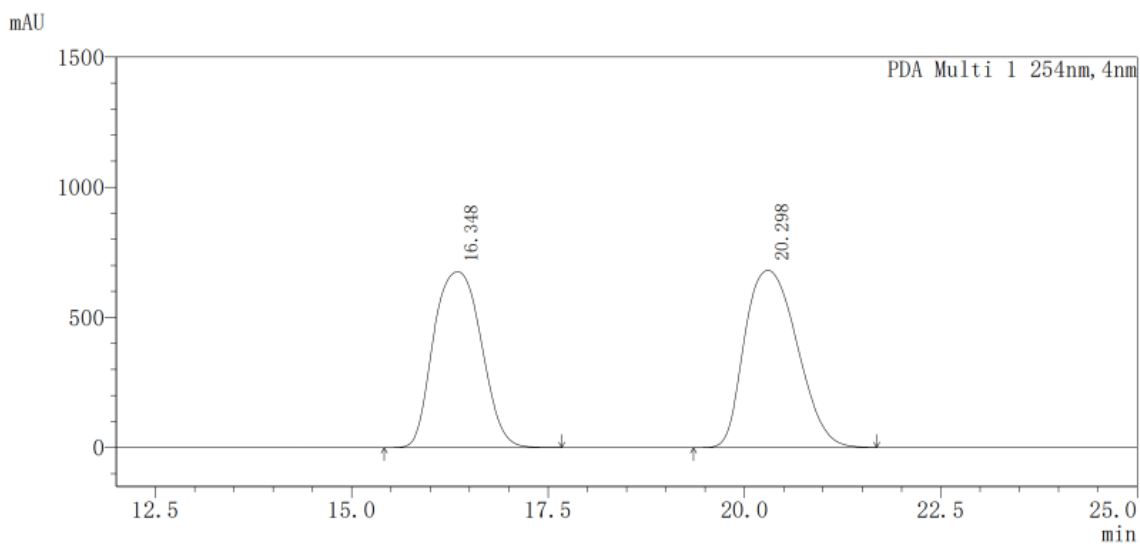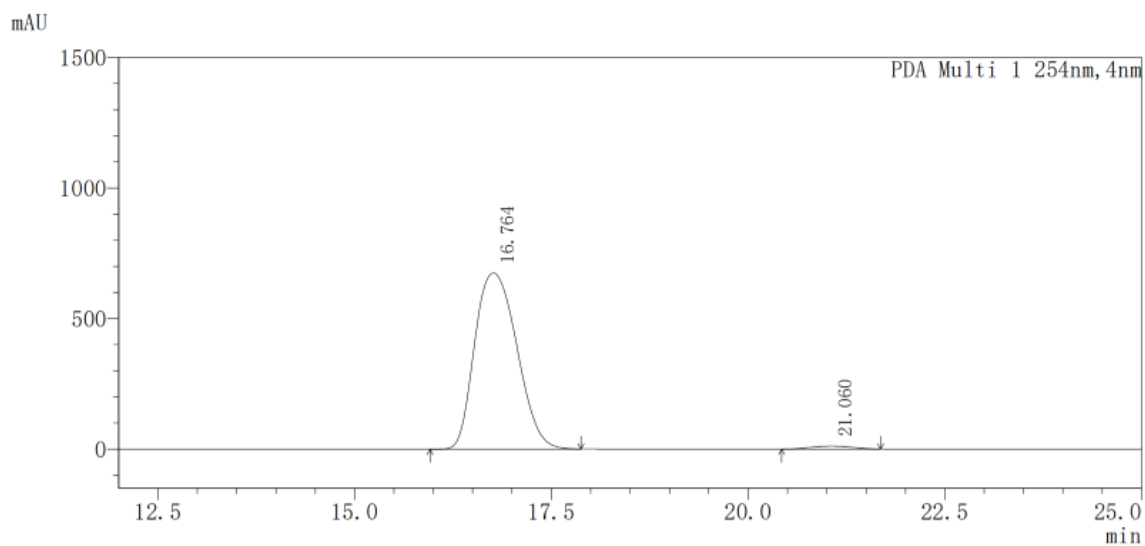

PDA Ch1 254nm

| Peak # | Ret. Time | Area     | Height | Area%   | Height% |
|--------|-----------|----------|--------|---------|---------|
| 1      | 16.764    | 25228969 | 675101 | 98.221  | 98.312  |
| 2      | 21.060    | 457038   | 11591  | 1.779   | 1.688   |
| 总计     |           | 25686007 | 686691 | 100.000 | 100.000 |

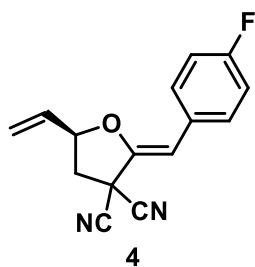

**Chiral HPLC:** 97% ee, Daicel Chiral pak IC column (1% IPA in hexanes, 1.0 mL/min),  $t_r$  = 19.8 min (major),  $t_r$  = 24.7 min (minor);

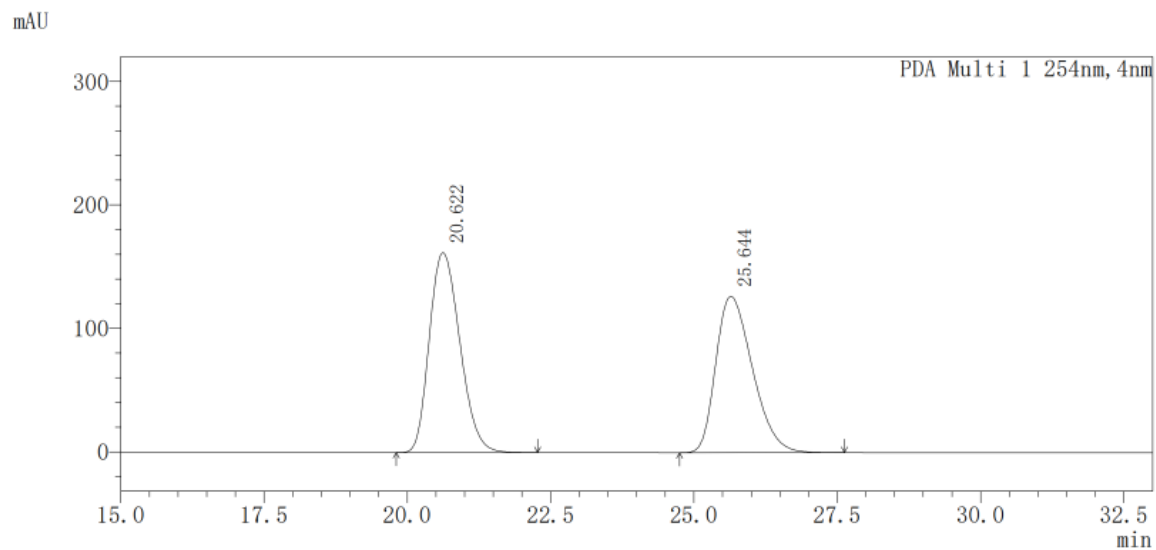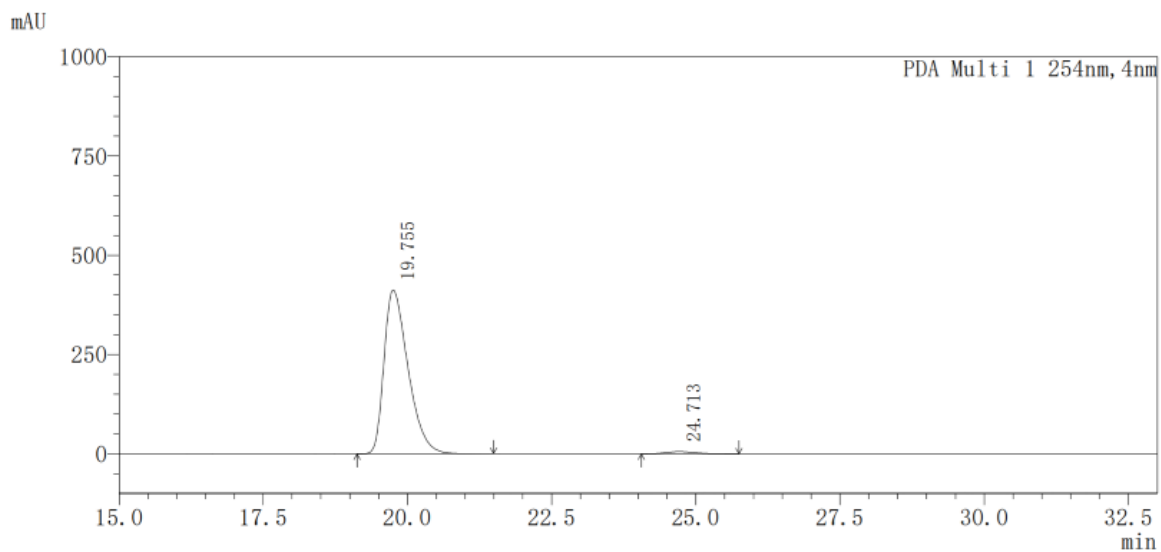

PDA Ch1 254nm

| Peak # | Ret. Time | Area     | Height | Area%   | Height% |
|--------|-----------|----------|--------|---------|---------|
| 1      | 19.755    | 11957047 | 412539 | 98.472  | 98.689  |
| 2      | 24.713    | 185545   | 5481   | 1.528   | 1.311   |
| 总计     |           | 12142592 | 418020 | 100.000 | 100.000 |

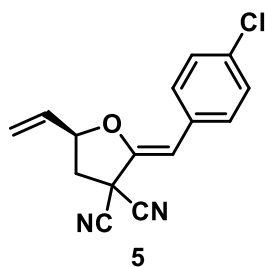

**Chiral HPLC:** 96% ee, Daicel Chiral pak IC column (1% IPA in hexanes, 1.0 mL/min),  $t_r$  = 20.5 min (major),  $t_r$  = 25.4 min (minor);

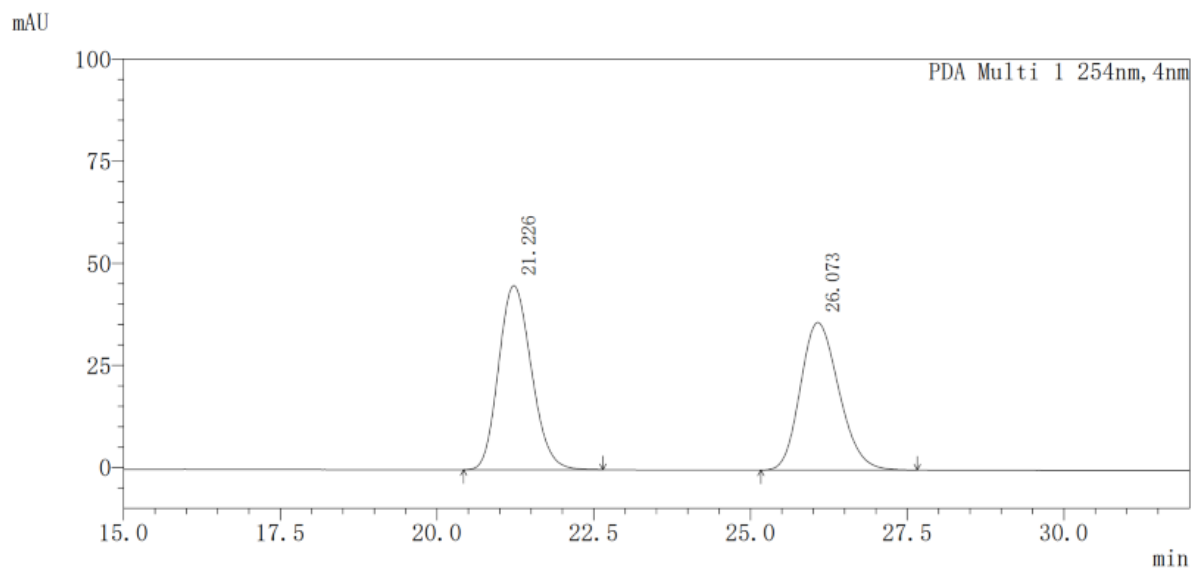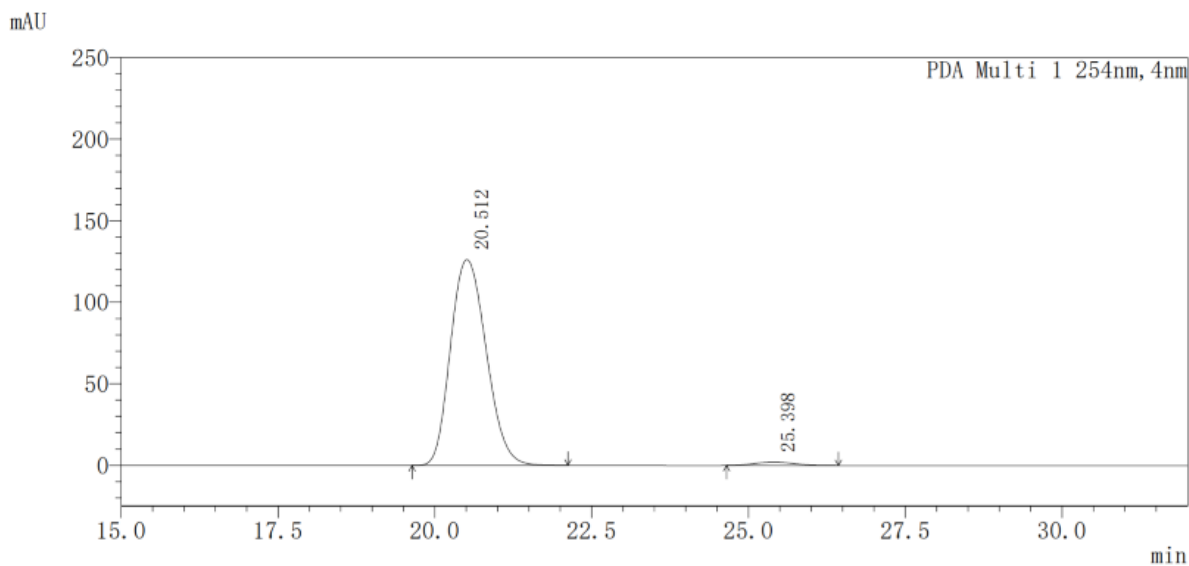

| PDA Ch1 254nm |           |         |        |         |         |
|---------------|-----------|---------|--------|---------|---------|
| Peak #        | Ret. Time | Area    | Height | Area%   | Height% |
| 1             | 20.512    | 5008416 | 126283 | 98.211  | 98.376  |
| 2             | 25.398    | 91207   | 2085   | 1.789   | 1.624   |
| 总计            |           | 5099624 | 128368 | 100.000 | 100.000 |

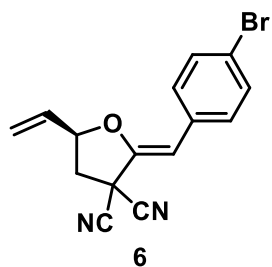

**Chiral HPLC:** 96% ee, Daicel Chiral pak IC column (1% IPA in hexanes, 1.0 mL/min),  $t_r$  = 22.0 min (major),  $t_r$  = 27.1 min (minor);

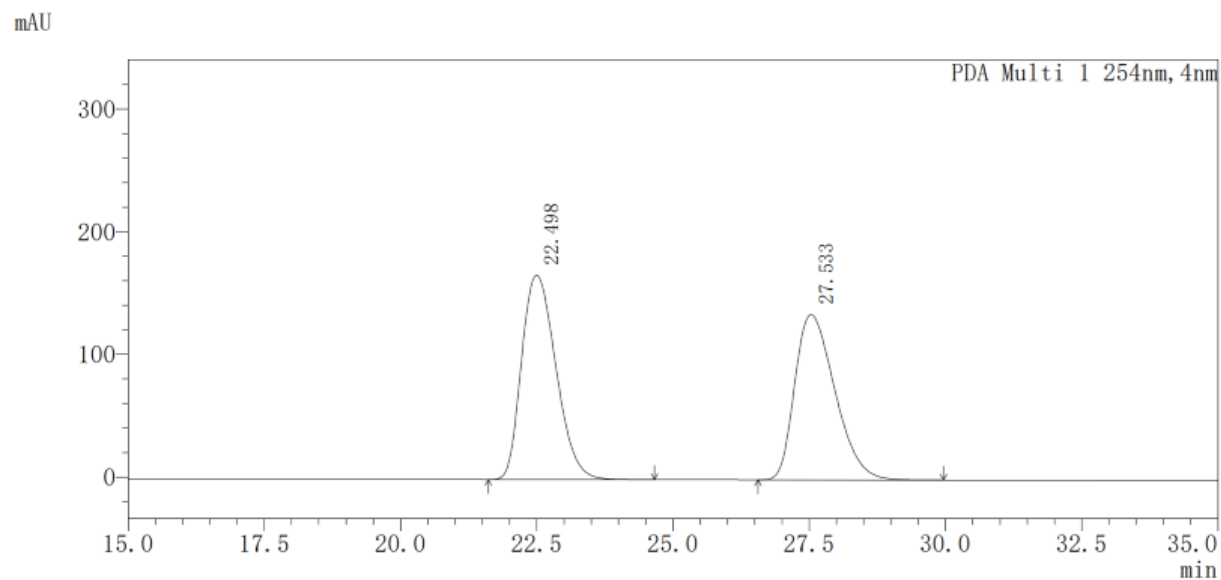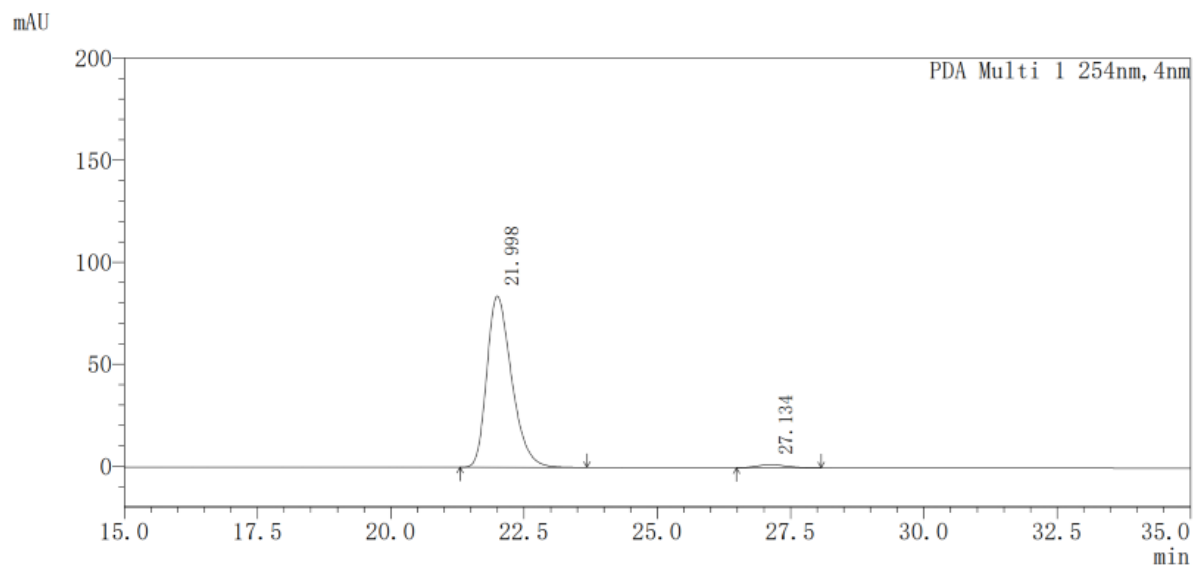

PDA Ch1 254nm

| Peak # | Ret. Time | Area    | Height | Area%   | Height% |
|--------|-----------|---------|--------|---------|---------|
| 1      | 21.998    | 2720835 | 83951  | 97.918  | 98.212  |
| 2      | 27.134    | 57853   | 1528   | 2.082   | 1.788   |
| 总计     |           | 2778688 | 85479  | 100.000 | 100.000 |

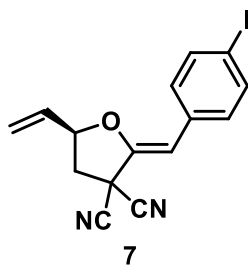

**Chiral HPLC:** 96% ee, Daicel Chiral pak IC column (1% IPA in hexanes, 1.0 mL/min),  $t_r$  = 23.0 min (major),  $t_r$  = 28.5 min (minor);

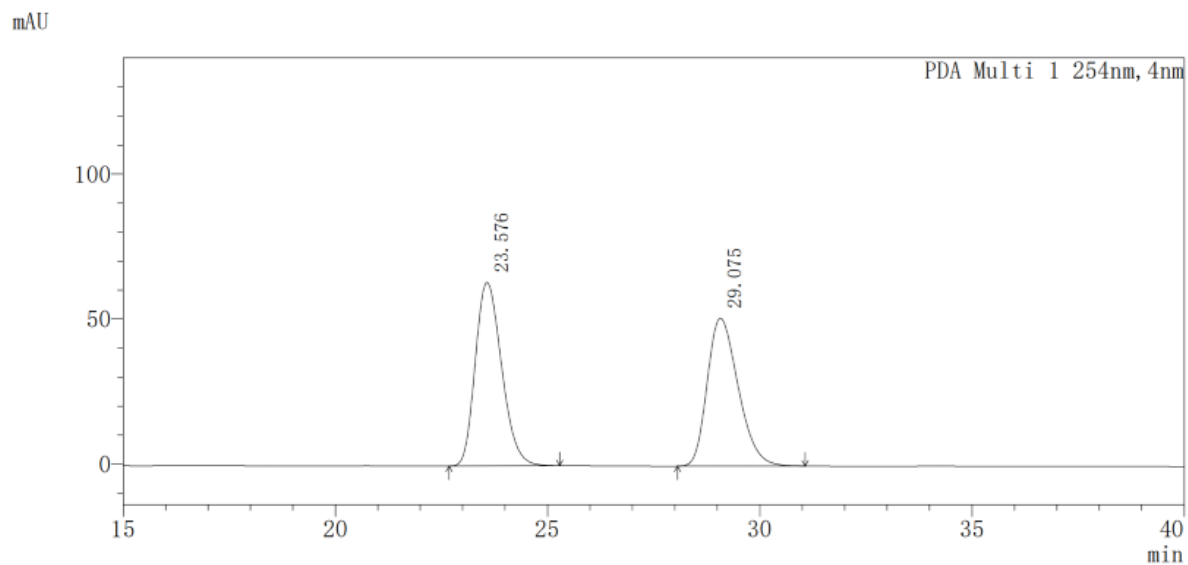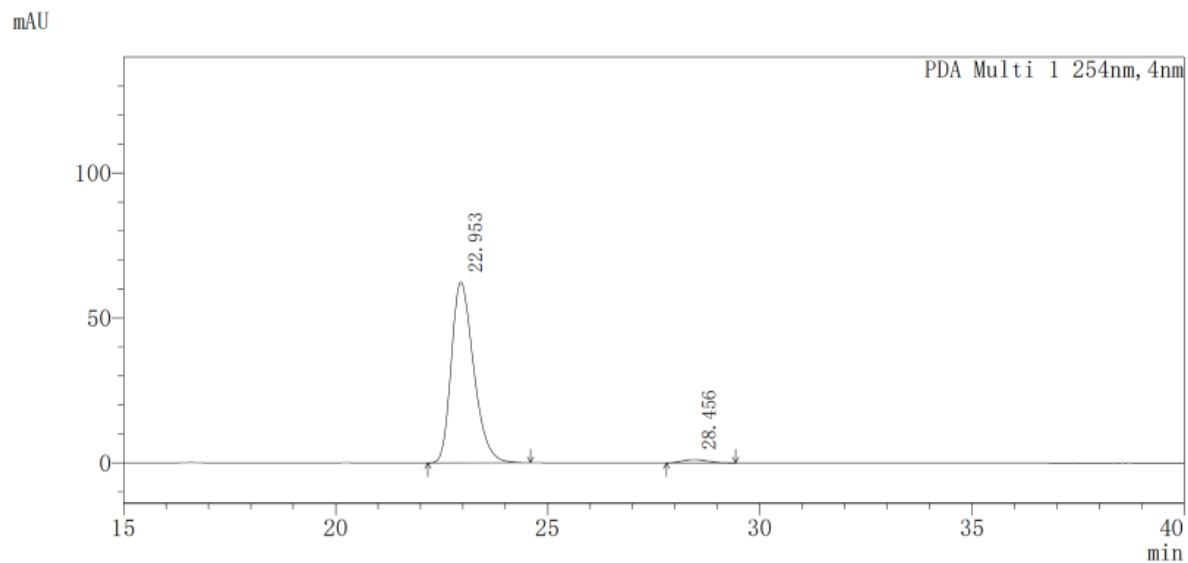

PDA Ch1 254nm

| Peak # | Ret. Time | Area    | Height | Area%   | Height% |
|--------|-----------|---------|--------|---------|---------|
| 1      | 22.953    | 2288588 | 62360  | 98.014  | 98.235  |
| 2      | 28.456    | 46373   | 1121   | 1.986   | 1.765   |
| 总计     |           | 2334962 | 63481  | 100.000 | 100.000 |

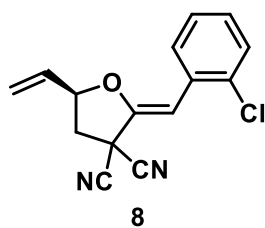

**Chiral HPLC:** 95% ee, Daicel Chiral pak ID column (1% IPA in hexanes, 1.0 mL/min),  $t_r$  = 11.2 min (major),  $t_r$  = 10.1 min (minor);

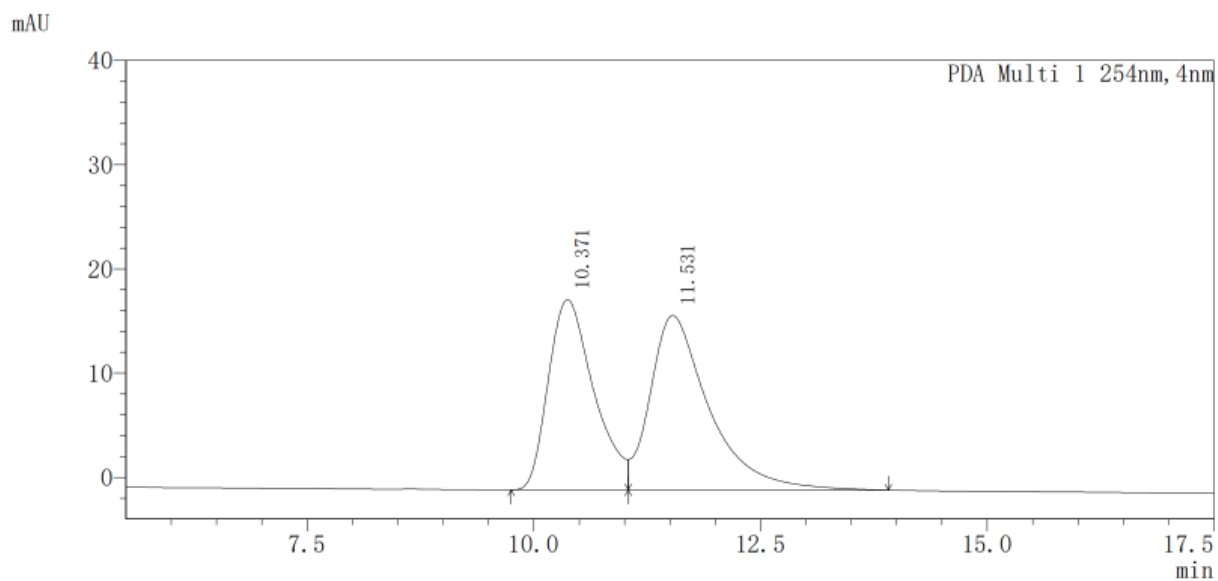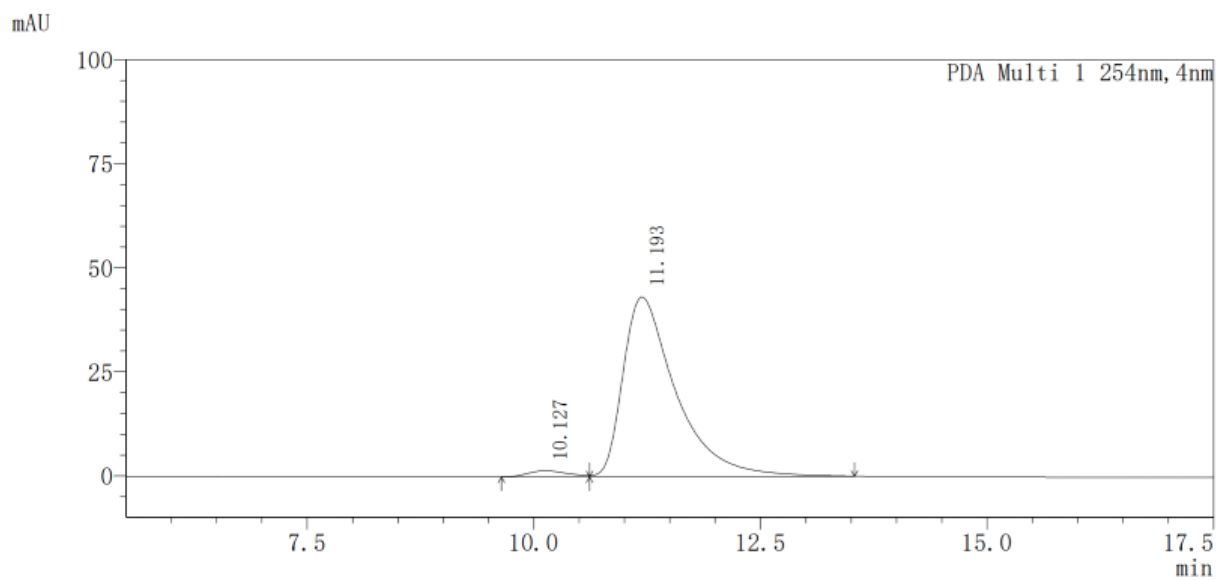

PDA Ch1 254nm

| Peak # | Ret. Time | Area    | Height | Area%   | Height% |
|--------|-----------|---------|--------|---------|---------|
| 1      | 10.127    | 44620   | 1459   | 2.467   | 3.265   |
| 2      | 11.193    | 1764426 | 43219  | 97.533  | 96.735  |
| 总计     |           | 1809047 | 44677  | 100.000 | 100.000 |

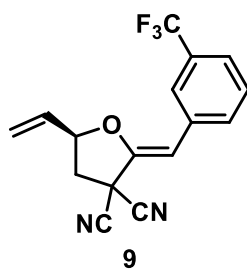

**Chiral HPLC:** 96% ee, Daicel Chiral pak IC column (1% IPA in hexanes, 1.0 mL/min),  $t_r$  = 15.5 min (major),  $t_r$  = 19.0 min (minor);

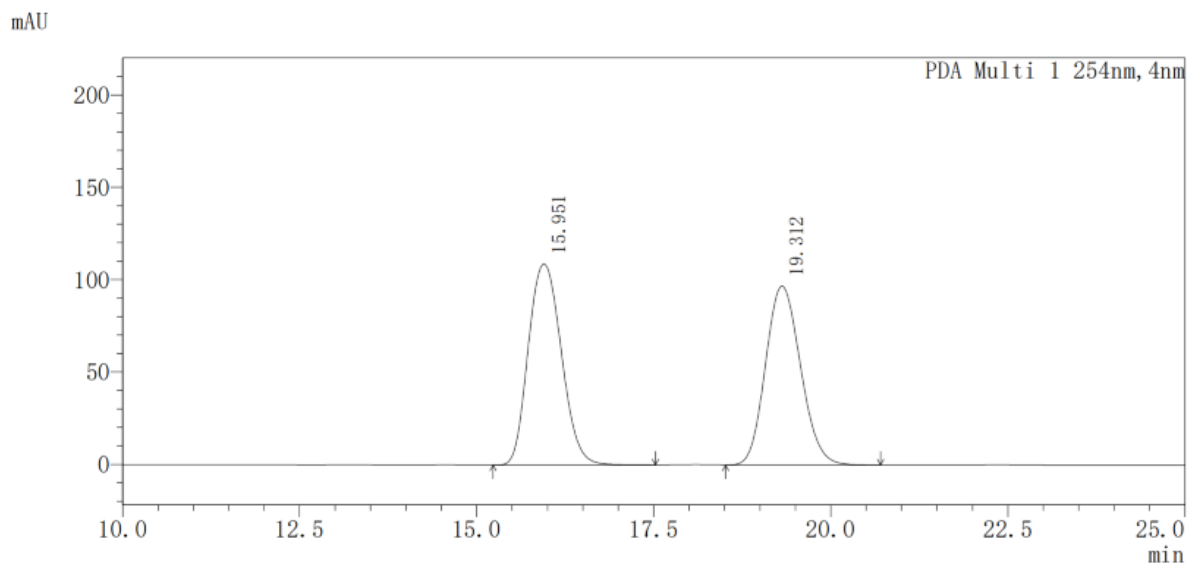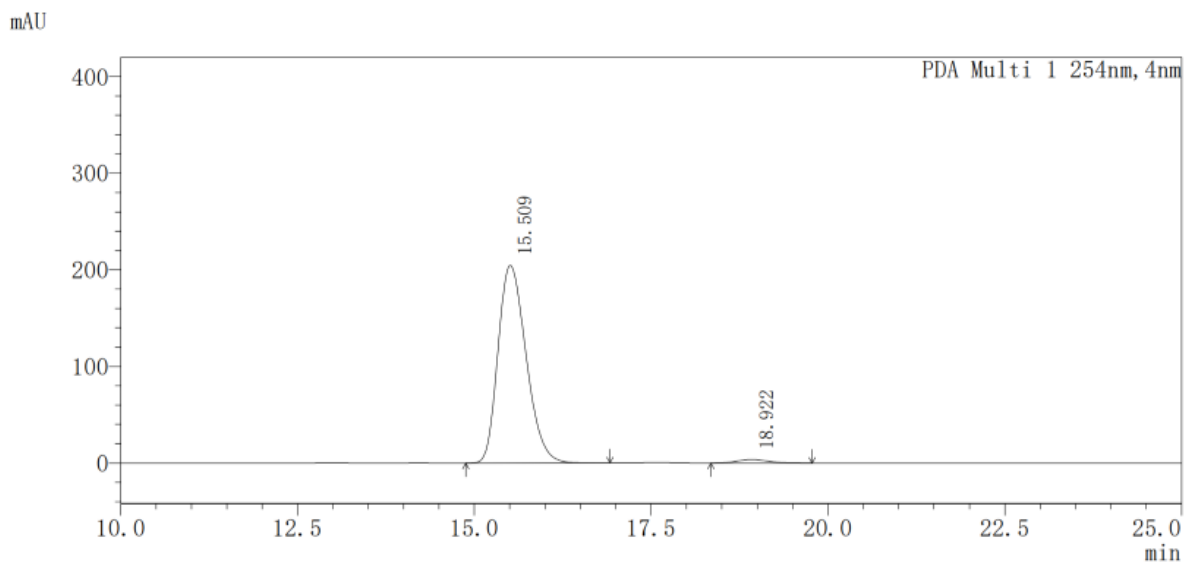

PDA Ch1 254nm

| Peak # | Ret. Time | Area    | Height | Area%   | Height% |
|--------|-----------|---------|--------|---------|---------|
| 1      | 15.509    | 5662662 | 204714 | 98.109  | 98.274  |
| 2      | 18.922    | 109173  | 3596   | 1.891   | 1.726   |
| 总计     |           | 5771834 | 208310 | 100.000 | 100.000 |

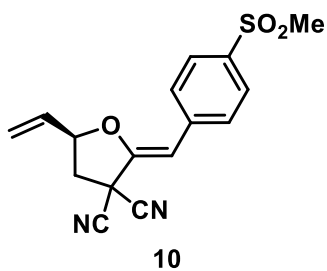

**Chiral HPLC:** 89% ee, Daicel Chiral pak IG column (30% IPA in hexanes, 1.0 mL/min),  $t_r$  = 29.9 min (major),  $t_r$  = 27.1 min (minor);

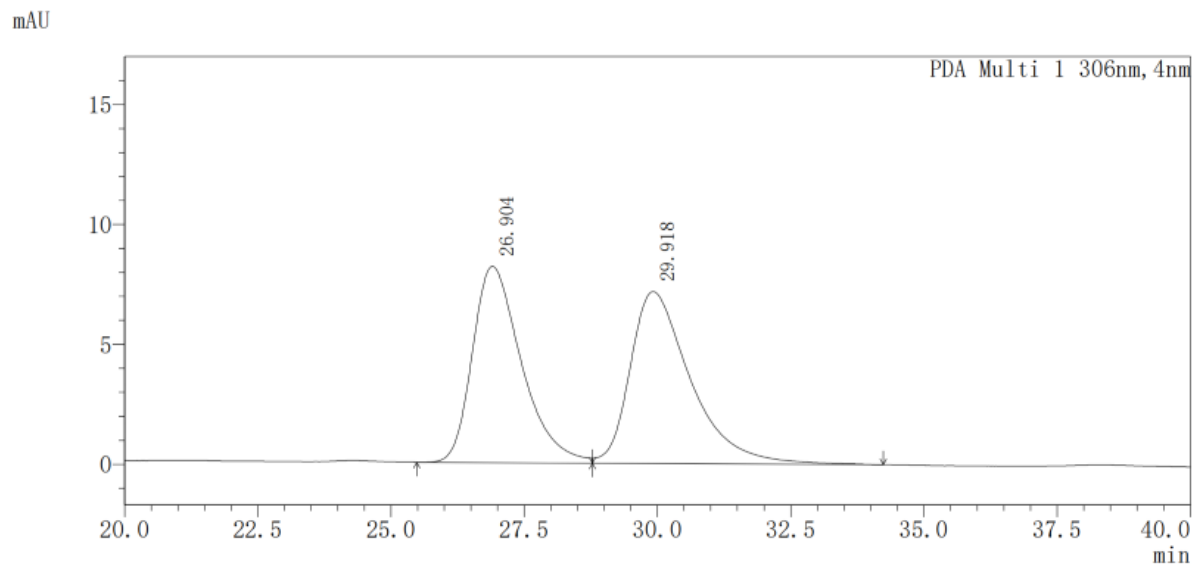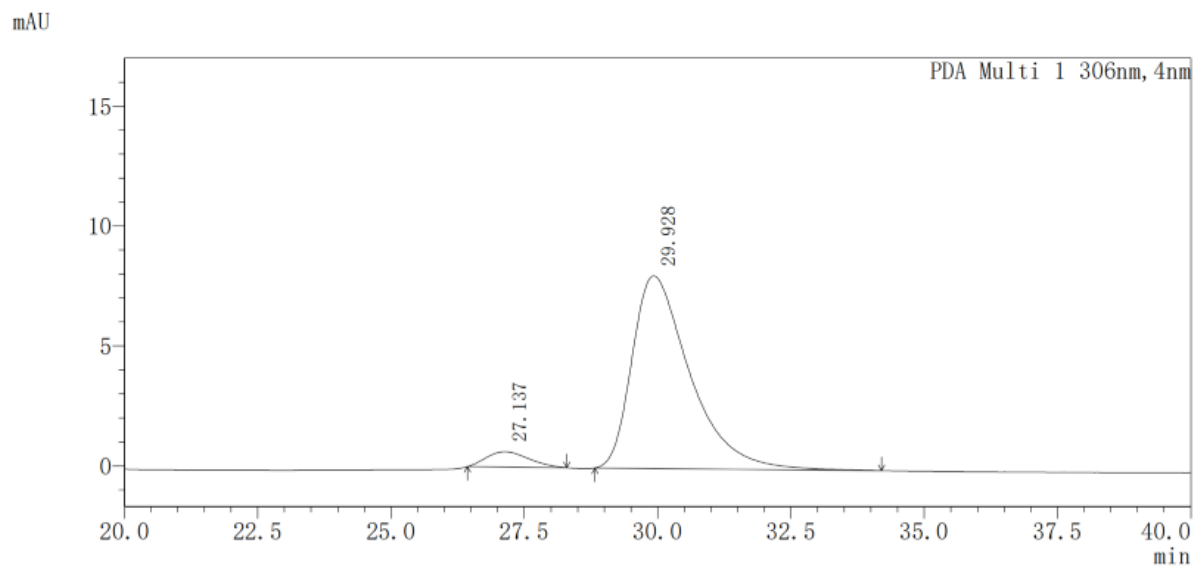

PDA Ch1 306nm

| Peak # | Ret. Time | Area   | Height | Area%   | Height% |
|--------|-----------|--------|--------|---------|---------|
| 1      | 27.137    | 35221  | 636    | 5.474   | 7.343   |
| 2      | 29.928    | 608225 | 8027   | 94.526  | 92.657  |
| 总计     |           | 643445 | 8664   | 100.000 | 100.000 |

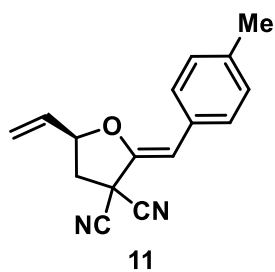

**Chiral HPLC:** 97% ee, Daicel Chiral pak IC column (1% IPA in hexanes, 1.0 mL/min),  $t_r$  = 15.4 min (major),  $t_r$  = 19.3 min (minor);

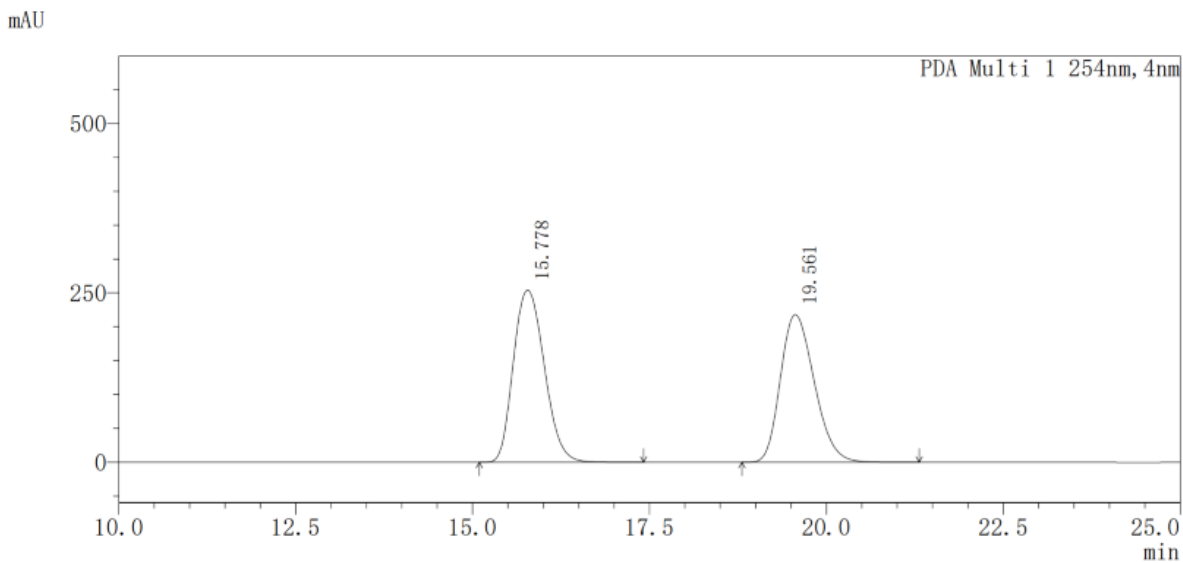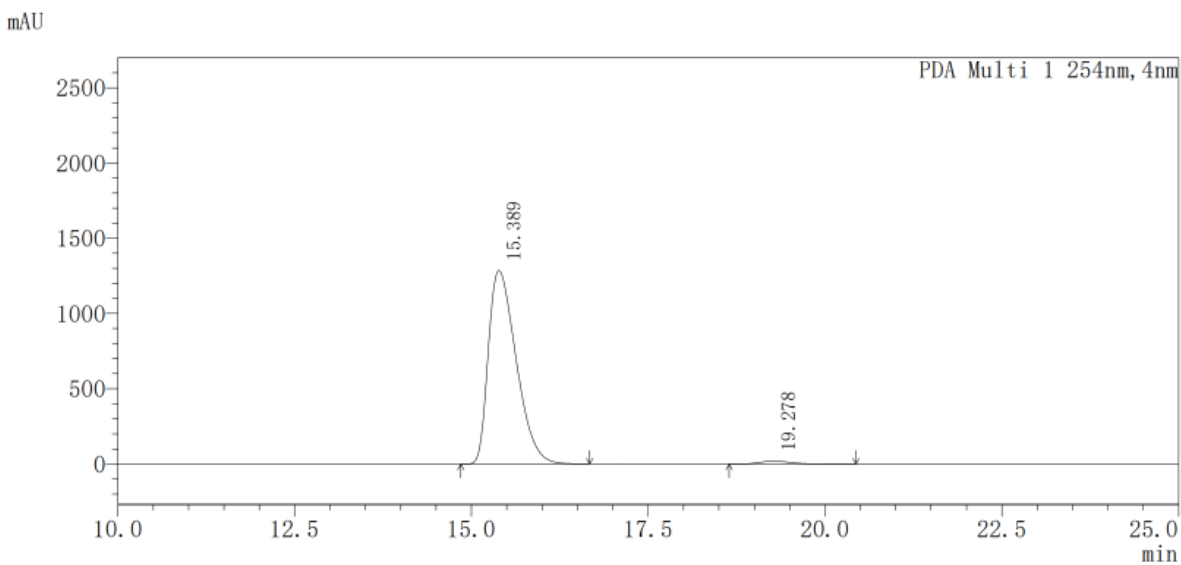

PDA Ch1 254nm

| Peak # | Ret. Time | Area     | Height  | Area%   | Height% |
|--------|-----------|----------|---------|---------|---------|
| 1      | 15.389    | 35212736 | 1284552 | 98.412  | 98.519  |
| 2      | 19.278    | 568254   | 19316   | 1.588   | 1.481   |
| 总计     |           | 35780990 | 1303867 | 100.000 | 100.000 |

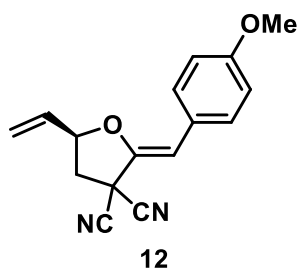

**Chiral HPLC:** 97% ee, Daicel Chiral pak IC column (1% IPA in hexanes, 1.0 mL/min),  $t_r$  = 30.4 min (major),  $t_r$  = 38.4 min (minor);

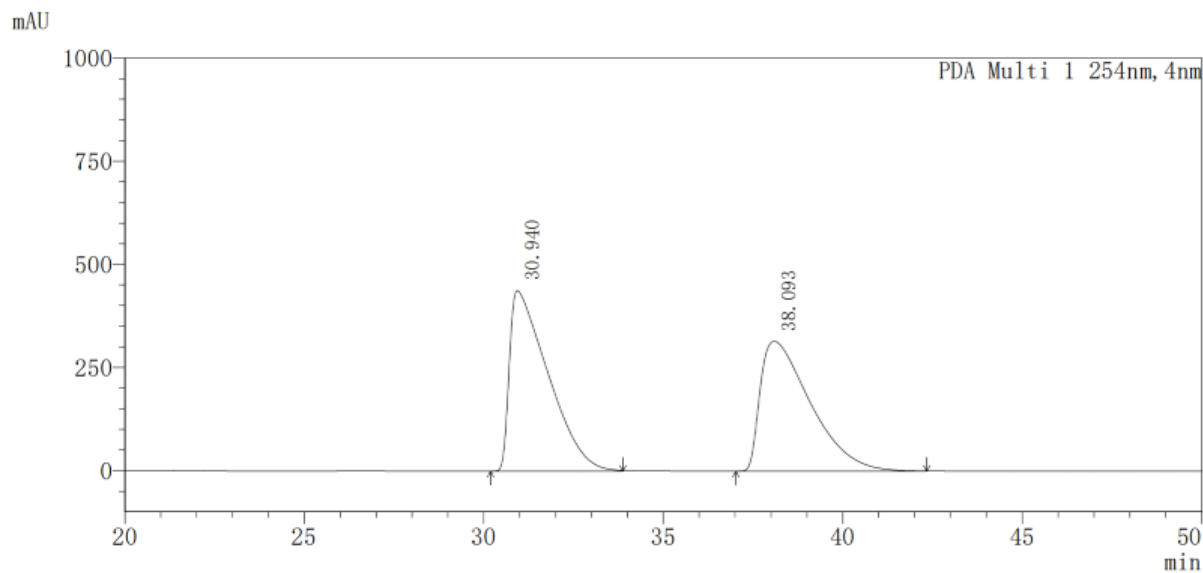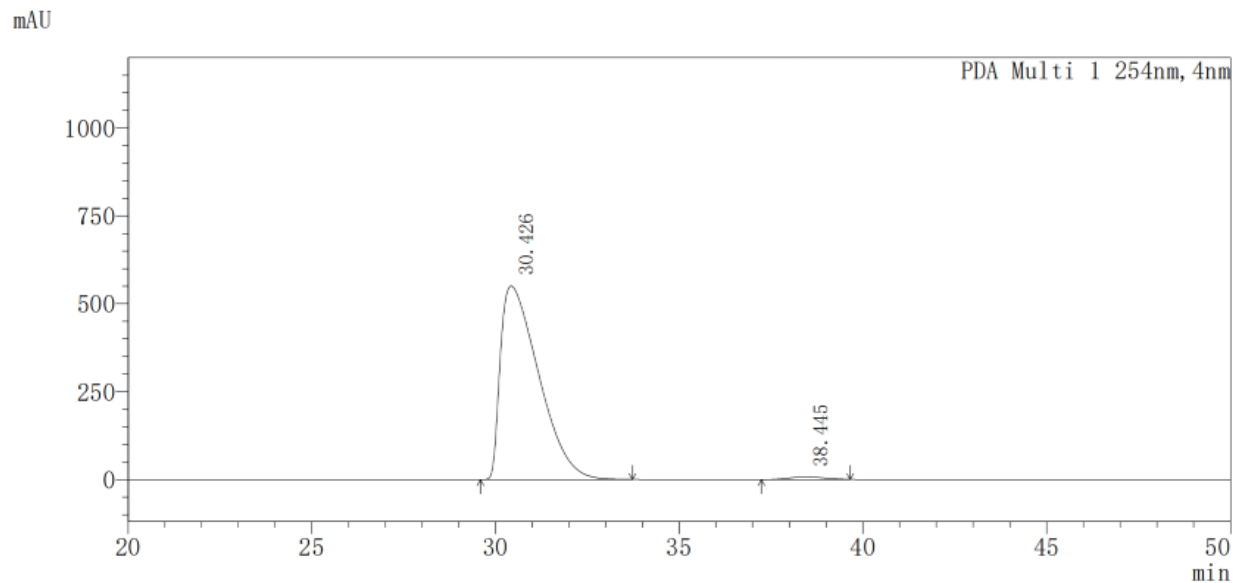

PDA Ch1 254nm

| Peak # | Ret. Time | Area     | Height | Area%   | Height% |
|--------|-----------|----------|--------|---------|---------|
| 1      | 30.426    | 39928367 | 550875 | 98.671  | 98.621  |
| 2      | 38.445    | 537895   | 7701   | 1.329   | 1.379   |
| 总计     |           | 40466262 | 558576 | 100.000 | 100.000 |

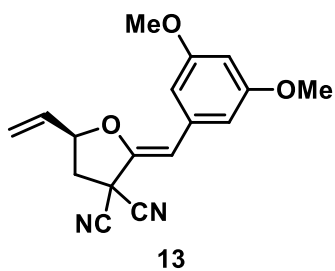

**Chiral HPLC:** 96% ee, Daicel Chiral pak IC column (5% IPA in hexanes, 1.0 mL/min),  $t_r$  = 18.9 min (major),  $t_r$  = 21.4 min (minor);

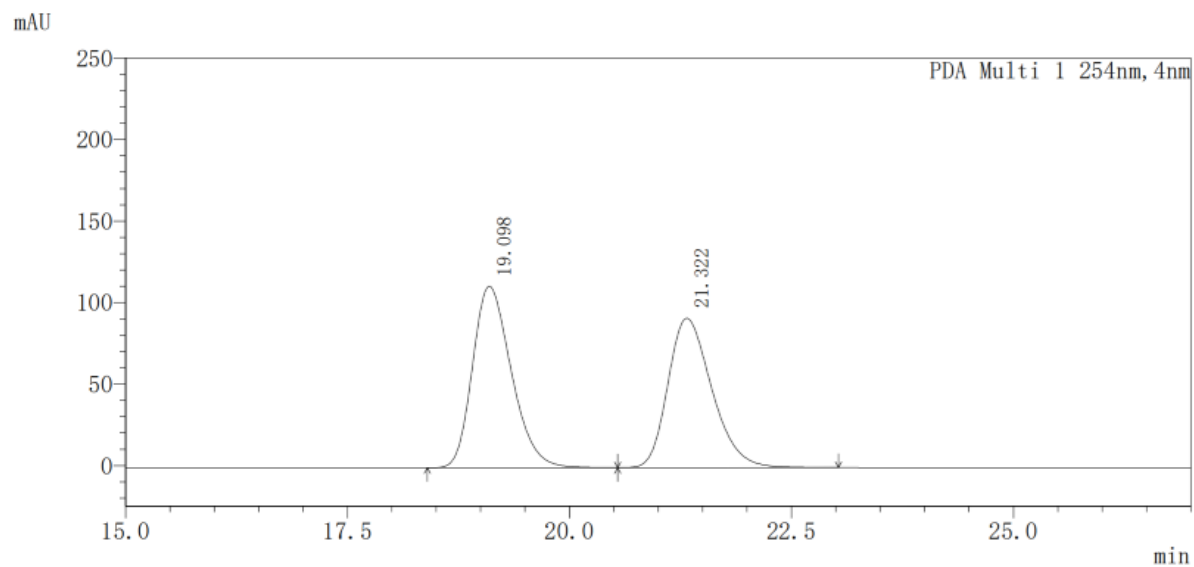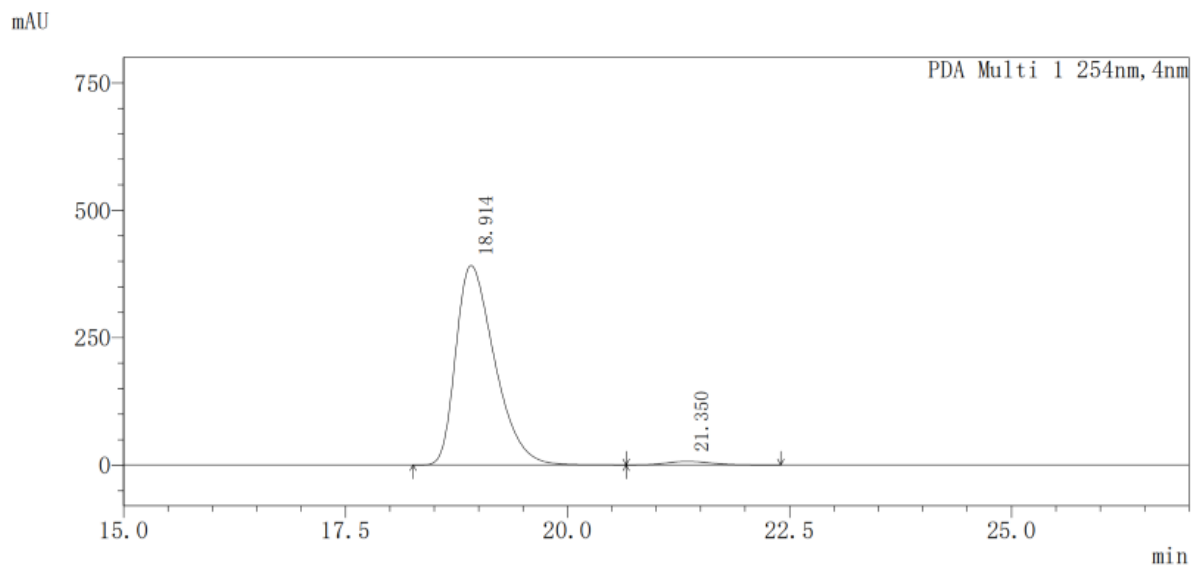

PDA Ch1 254nm

| Peak # | Ret. Time | Area     | Height | Area%   | Height% |
|--------|-----------|----------|--------|---------|---------|
| 1      | 18.914    | 11911909 | 391535 | 97.998  | 98.235  |
| 2      | 21.350    | 243313   | 7036   | 2.002   | 1.765   |
| 总计     |           | 12155222 | 398570 | 100.000 | 100.000 |

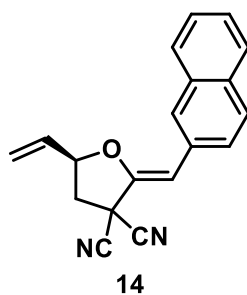

**Chiral HPLC:** 96% ee, Daicel Chiral pak IE column (1% IPA in hexanes, 1.0 mL/min),  $t_r$  = 19.2 min (major),  $t_r$  = 19.1 min (minor);

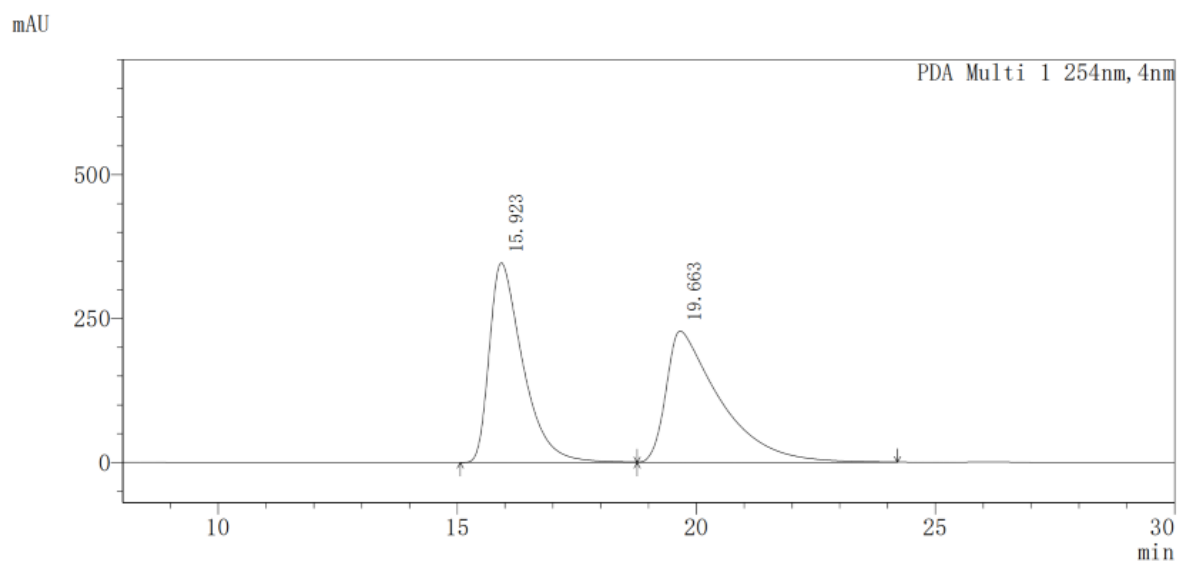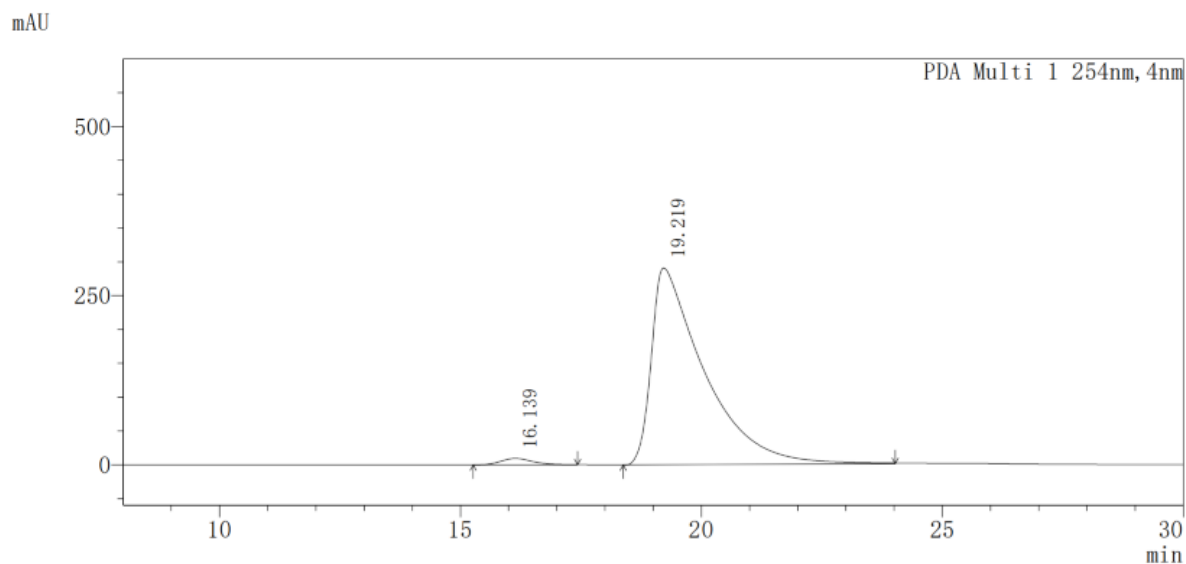

PDA Ch1 254nm

| Peak # | Ret. Time | Area     | Height | Area%   | Height% |
|--------|-----------|----------|--------|---------|---------|
| 1      | 16.139    | 447064   | 9544   | 1.973   | 3.178   |
| 2      | 19.219    | 22211678 | 290813 | 98.027  | 96.822  |
| 总计     |           | 22658742 | 300357 | 100.000 | 100.000 |

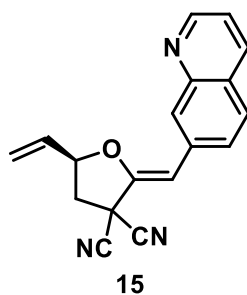

**Chiral HPLC:** 96% ee, Daicel Chiral pak IE column (10% IPA in hexanes, 1.0 mL/min),  $t_r$  = 27.5 min (major),  $t_r$  = 25.6 min (minor);

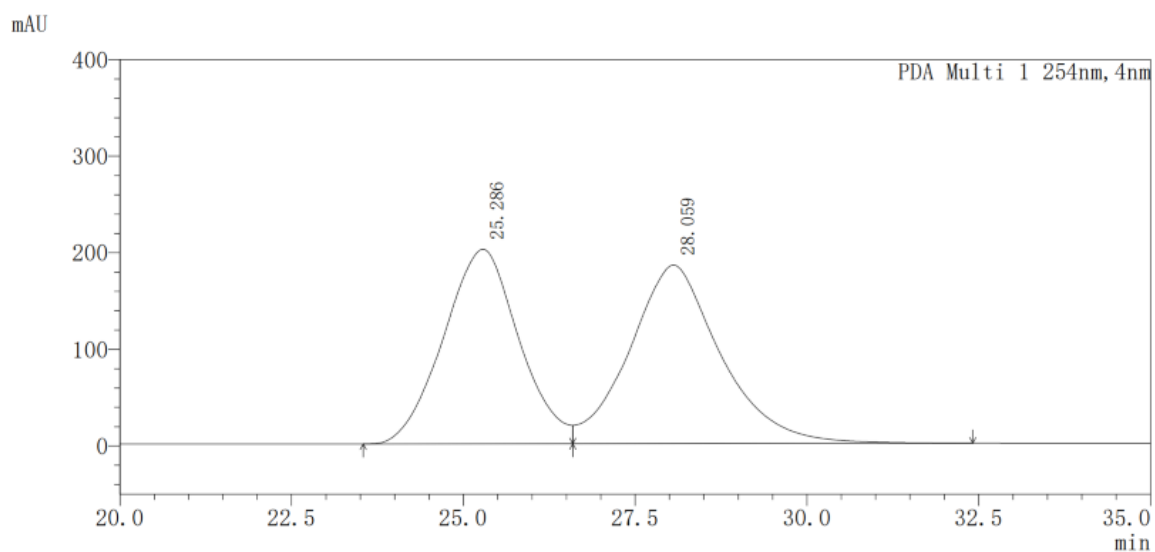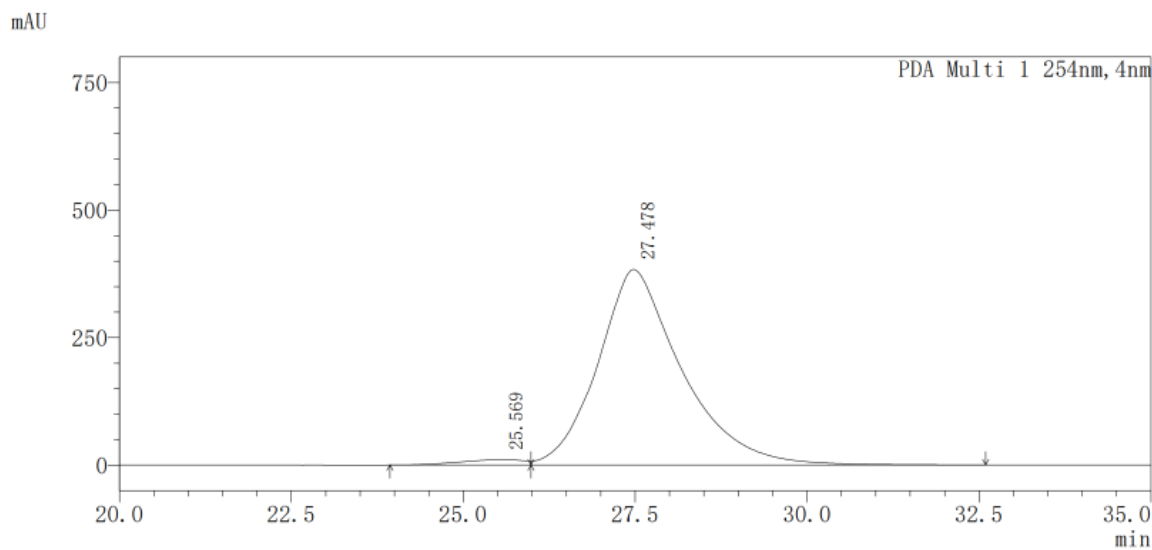

| PDA Ch1 254nm |           |          |        |         |         |
|---------------|-----------|----------|--------|---------|---------|
| Peak #        | Ret. Time | Area     | Height | Area%   | Height% |
| 1             | 25.569    | 678768   | 10491  | 2.047   | 2.665   |
| 2             | 27.478    | 32481909 | 383115 | 97.953  | 97.335  |
| 总计            |           | 33160677 | 393606 | 100.000 | 100.000 |

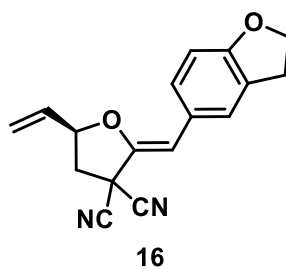

**Chiral HPLC:** 97% ee, Daicel Chiral pak IC column (3% IPA in hexanes, 1.0 mL/min),  $t_r$  = 24.2 min (major),  $t_r$  = 28.7 min (minor);

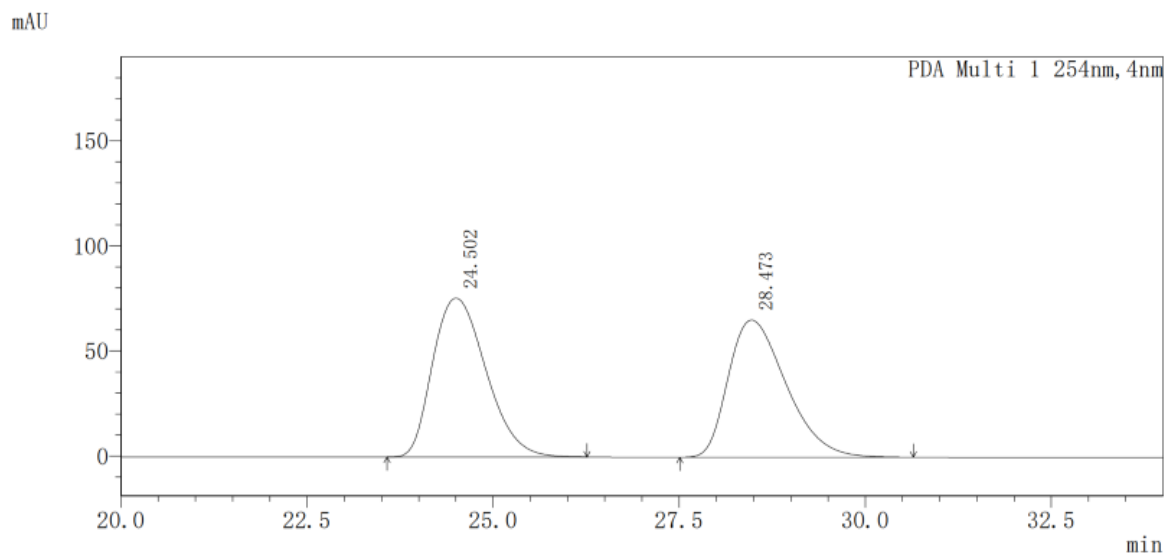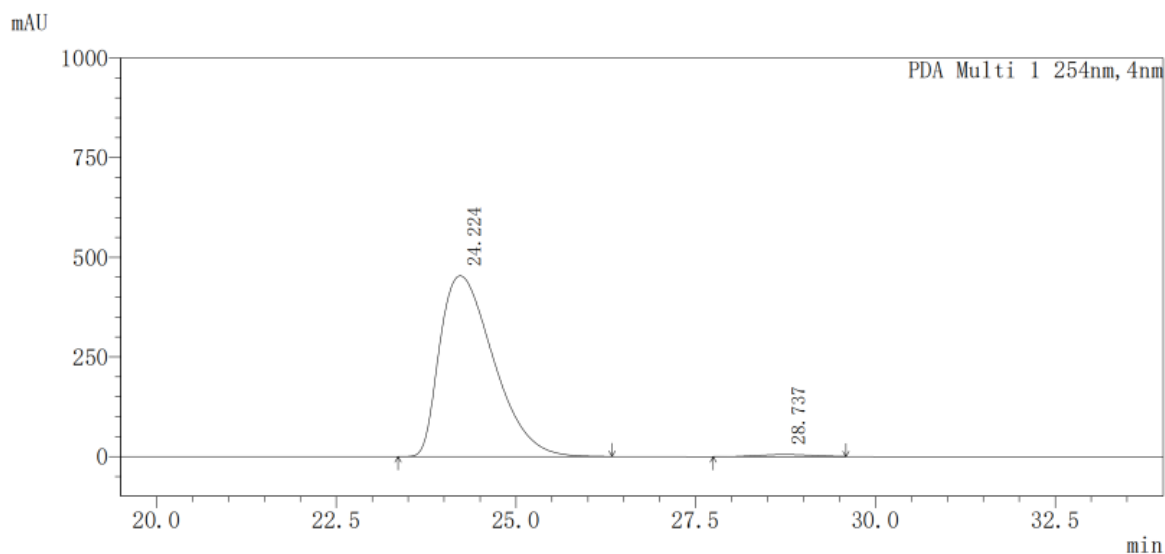

PDA Ch1 254nm

| Peak # | Ret. Time | Area     | Height | Area%   | Height% |
|--------|-----------|----------|--------|---------|---------|
| 1      | 24.224    | 23677591 | 453961 | 98.704  | 98.824  |
| 2      | 28.737    | 310884   | 5400   | 1.296   | 1.176   |
| 总计     |           | 23988475 | 459361 | 100.000 | 100.000 |

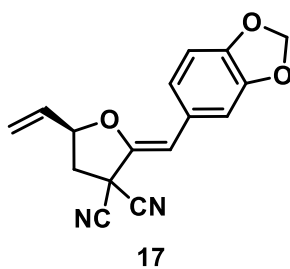

**Chiral HPLC:** 97% ee, Daicel Chiral pak IC column (1% IPA in hexanes, 1.0 mL/min),  $t_r$  = 36.4 min (major),  $t_r$  = 44.3 min (minor);

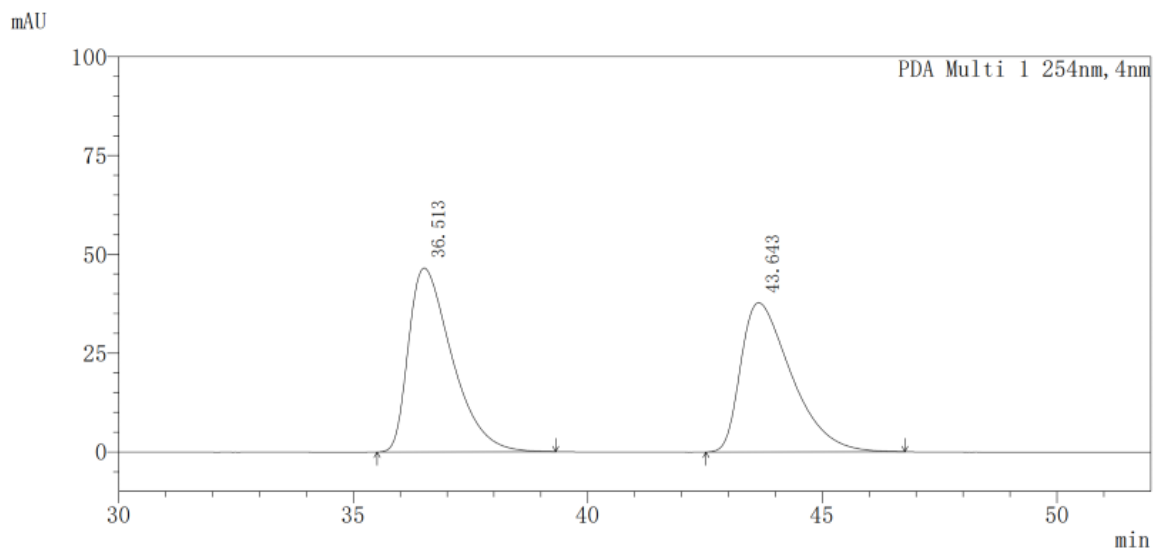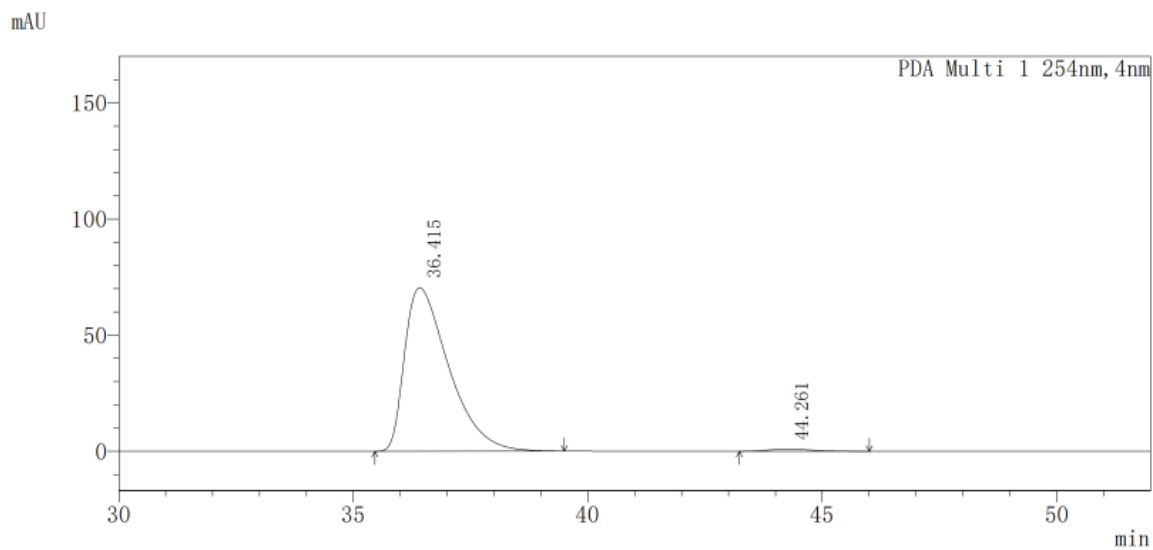

PDA Ch1 254nm

| Peak # | Ret. Time | Area    | Height | Area%   | Height% |
|--------|-----------|---------|--------|---------|---------|
| 1      | 36.415    | 4629526 | 70471  | 98.665  | 98.749  |
| 2      | 44.261    | 62648   | 893    | 1.335   | 1.251   |
| 总计     |           | 4692174 | 71364  | 100.000 | 100.000 |

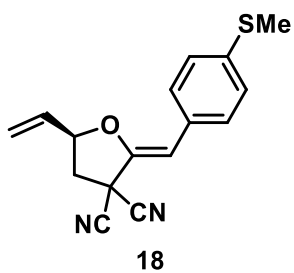

**Chiral HPLC:** 97% ee, Daicel Chiral pak IC column (1% IPA in hexanes, 1.0 mL/min),  $t_r$  = 32.4 min (major),  $t_r$  = 40.3 min (minor);

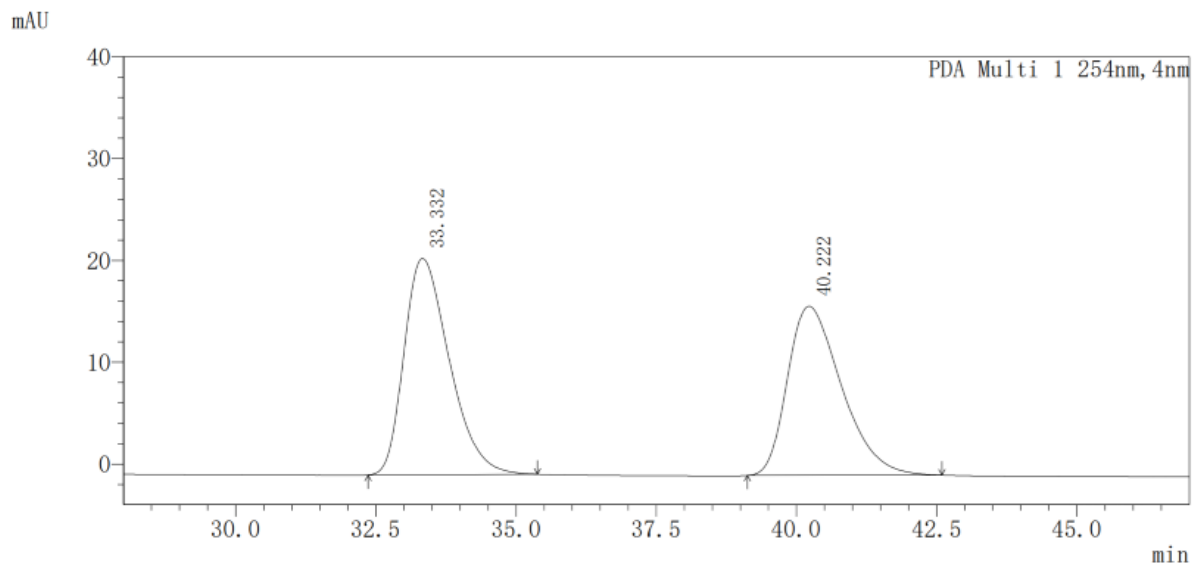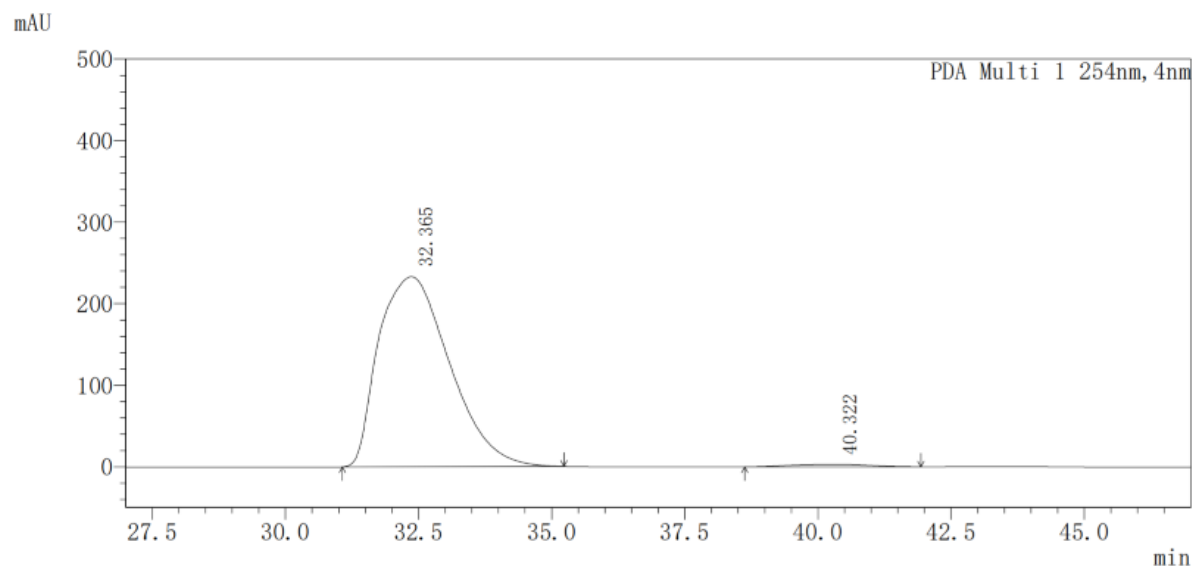

PDA Ch1 254nm

| Peak # | Ret. Time | Area     | Height | Area%   | Height% |
|--------|-----------|----------|--------|---------|---------|
| 1      | 32.365    | 21615328 | 233008 | 98.599  | 98.745  |
| 2      | 40.322    | 307138   | 2961   | 1.401   | 1.255   |
| 总计     |           | 21922466 | 235969 | 100.000 | 100.000 |

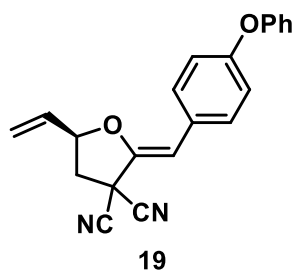

**Chiral HPLC:** 97% ee, Daicel Chiral pak IC column (1% IPA in hexanes, 1.0 mL/min),  $t_r$  = 28.2 min (major),  $t_r$  = 34.6 min (minor);

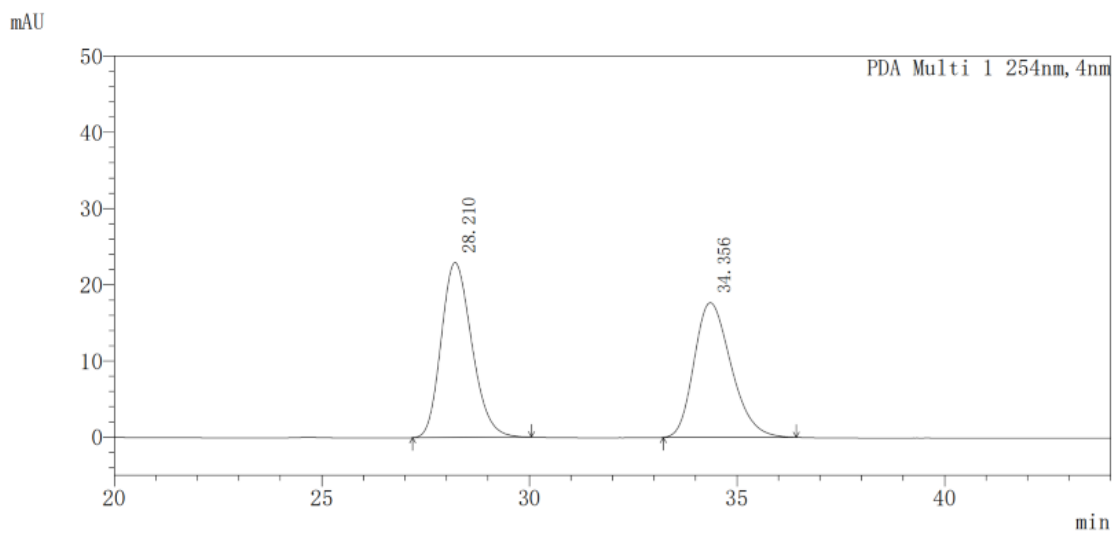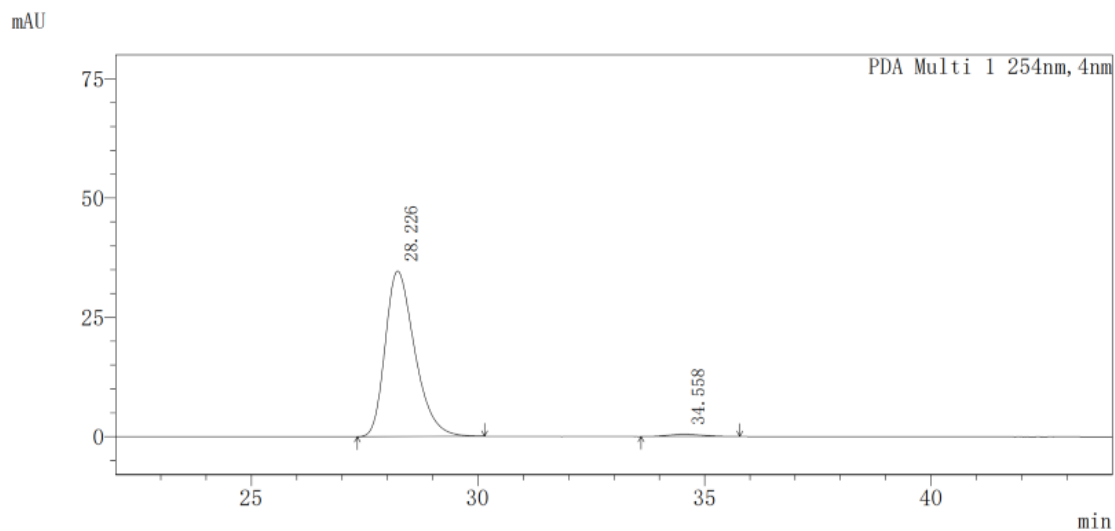

PDA Ch1 254nm

| Peak # | Ret. Time | Area    | Height | Area%   | Height% |
|--------|-----------|---------|--------|---------|---------|
| 1      | 28.226    | 1573483 | 34700  | 98.395  | 98.618  |
| 2      | 34.558    | 25665   | 486    | 1.605   | 1.382   |
| 总计     |           | 1599148 | 35186  | 100.000 | 100.000 |

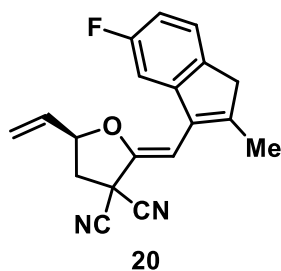

**Chiral HPLC:** 97% ee, Daicel Chiral pak IC column (1% IPA in hexanes, 1.0 mL/min),  $t_r$  = 20.1 min (major),  $t_r$  = 23.1 min (minor);

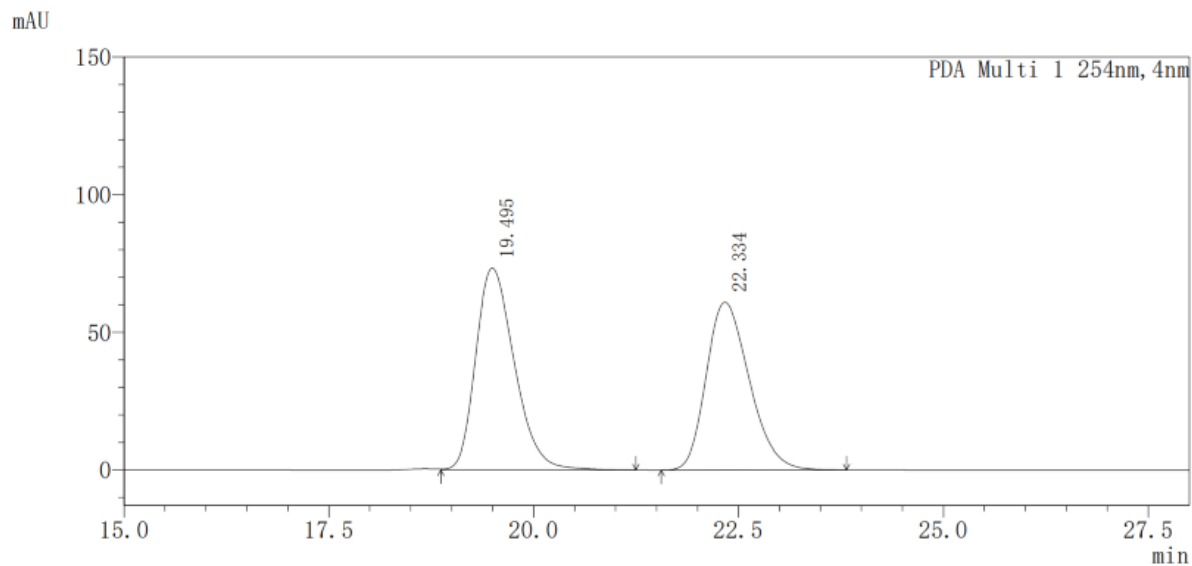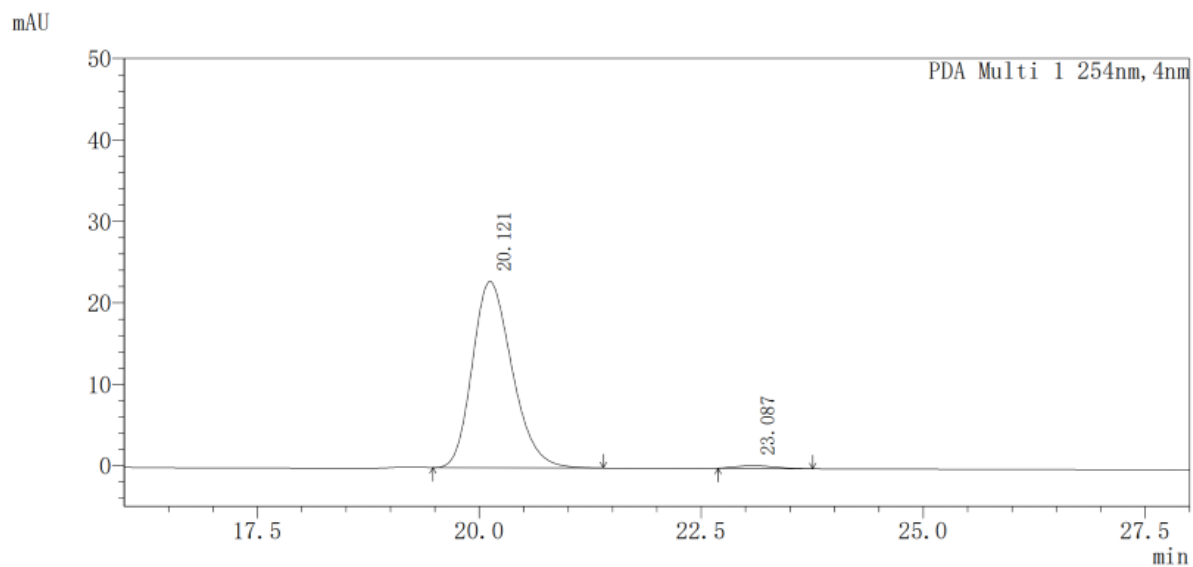

PDA Ch1 254nm

| Peak # | Ret. Time | Area   | Height | Area%   | Height% |
|--------|-----------|--------|--------|---------|---------|
| 1      | 20.121    | 713174 | 22874  | 98.576  | 98.540  |
| 2      | 23.087    | 10301  | 339    | 1.424   | 1.460   |
| 总计     |           | 723475 | 23213  | 100.000 | 100.000 |

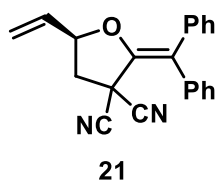

**Chiral HPLC:** >99% ee, Daicel Chiral pak ID column (1% IPA in hexanes, 1.0 mL/min),  $t_r$  = 14.8 min (major),  $t_r$  = 18.0 min (minor);

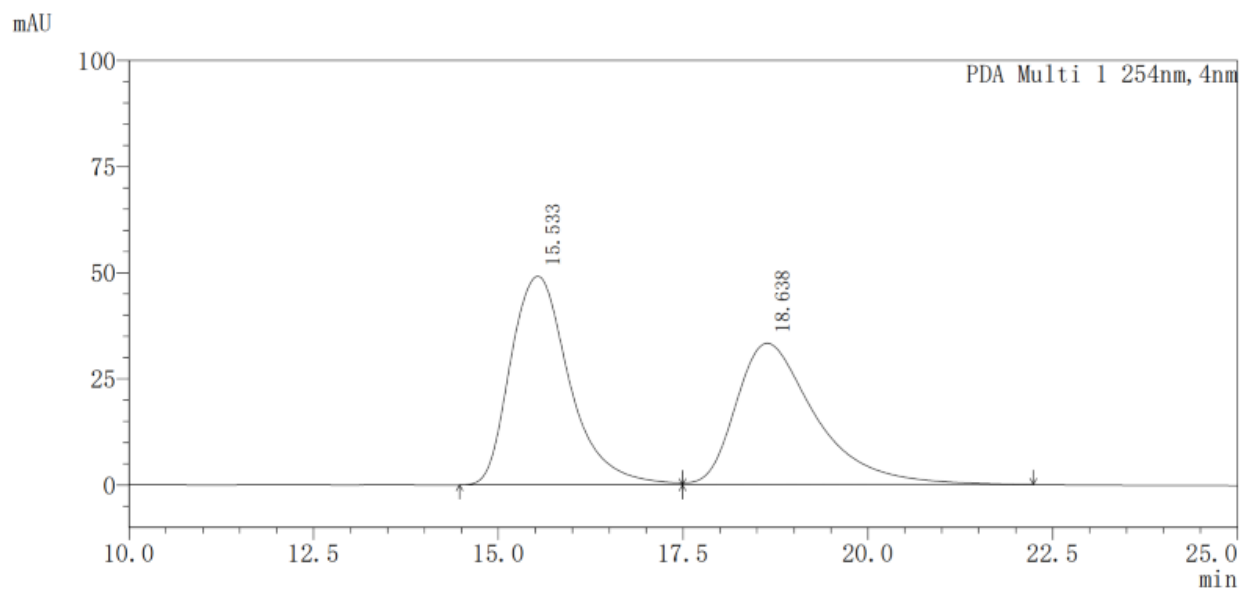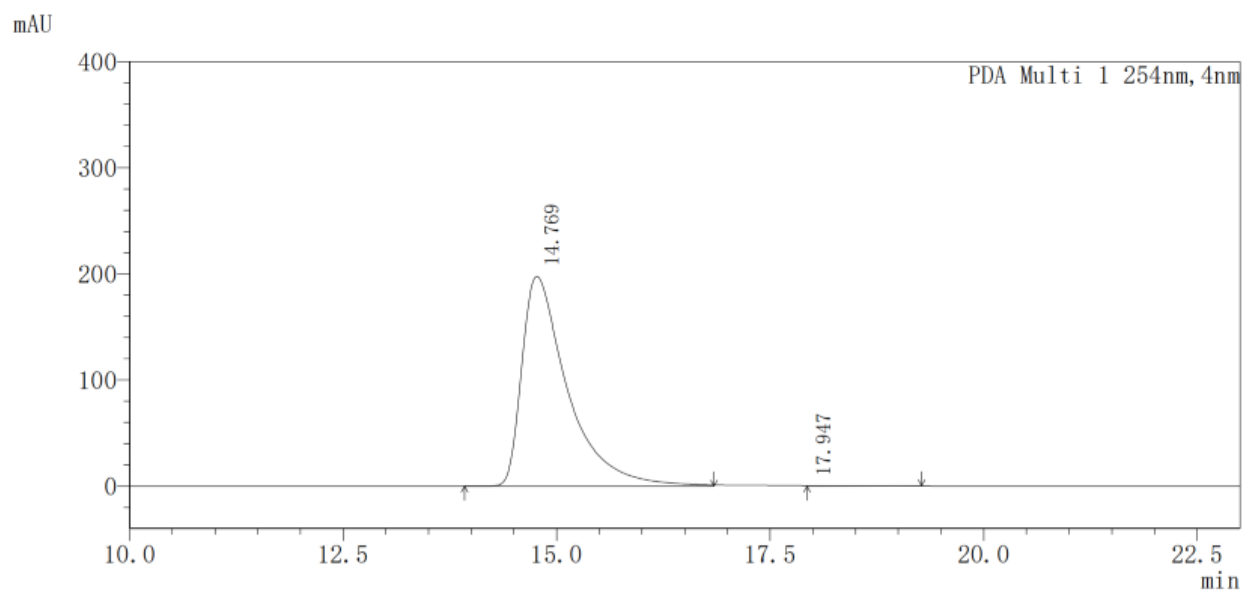

PDA Ch1 254nm

| Peak # | Ret. Time | Area    | Height | Area%   | Height% |
|--------|-----------|---------|--------|---------|---------|
| 1      | 14.769    | 7370568 | 197633 | 99.898  | 99.862  |
| 2      | 17.947    | 7524    | 273    | 0.102   | 0.138   |
| 总计     |           | 7378092 | 197906 | 100.000 | 100.000 |

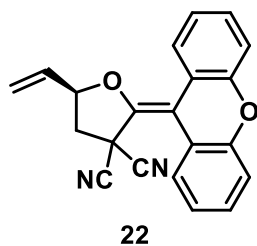

**Chiral HPLC:** 99% ee, Daicel Chiral pak IC column (1% IPA in hexanes, 1.0 mL/min),  $t_r$  = 18.2 min (major),  $t_r$  = 20.6 min (minor);

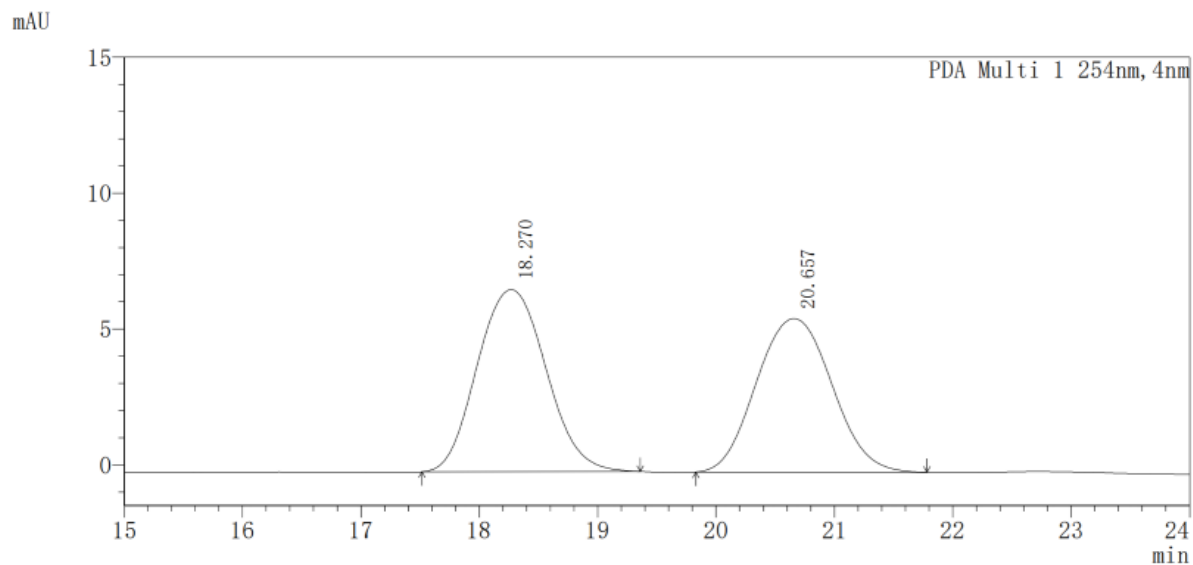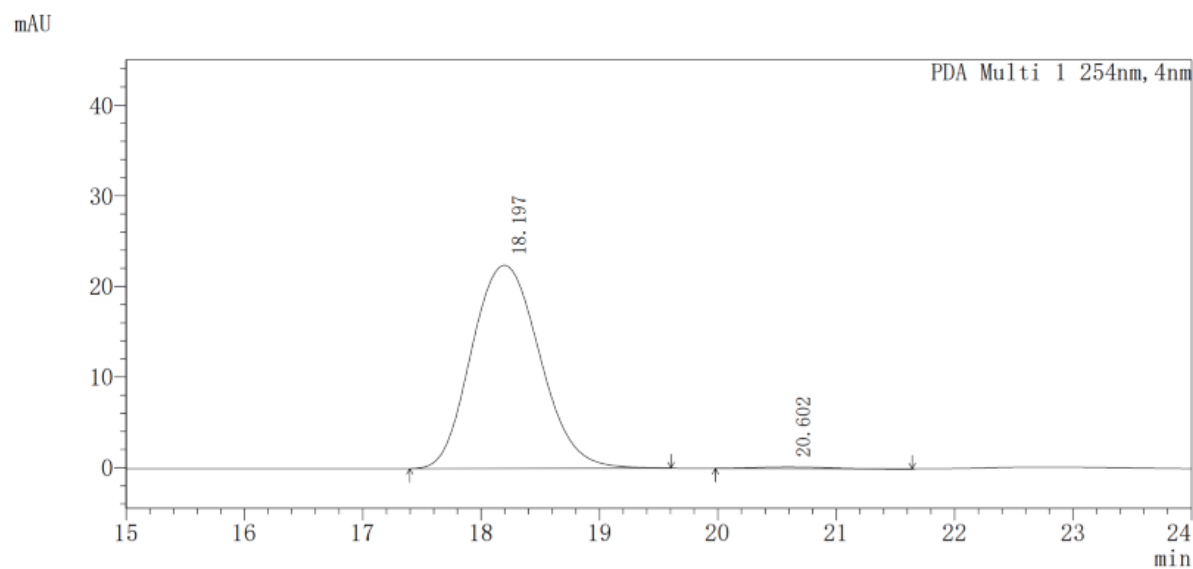

PDA Ch1 254nm

| Peak # | Ret. Time | Area   | Height | Area%   | Height% |
|--------|-----------|--------|--------|---------|---------|
| 1      | 18.197    | 898683 | 22405  | 99.252  | 99.226  |
| 2      | 20.602    | 6769   | 175    | 0.748   | 0.774   |
| 总计     |           | 905452 | 22580  | 100.000 | 100.000 |

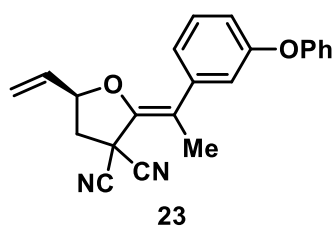

**Chiral HPLC:** 98% ee, Daicel Chiral pak IC column (1% IPA in hexanes, 1.0 mL/min),  $t_r$  = 17.3 min (major),  $t_r$  = 20.2 min (minor);

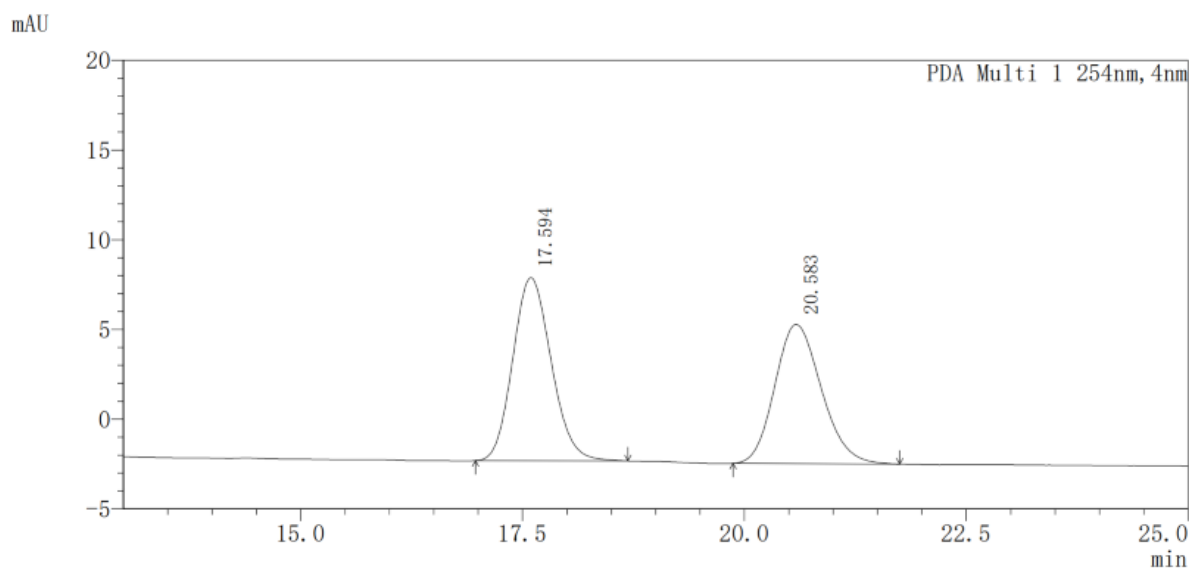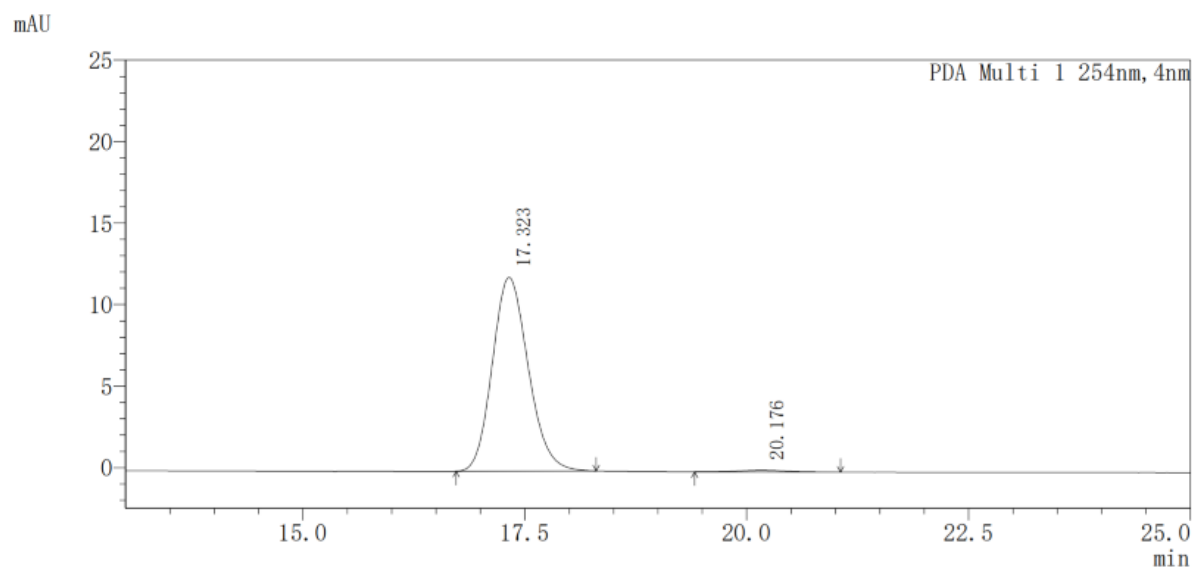

PDA Ch1 254nm

| Peak # | Ret. Time | Area   | Height | Area%   | Height% |
|--------|-----------|--------|--------|---------|---------|
| 1      | 17.323    | 335113 | 11887  | 98.912  | 99.072  |
| 2      | 20.176    | 3685   | 111    | 1.088   | 0.928   |
| 总计     |           | 338798 | 11999  | 100.000 | 100.000 |

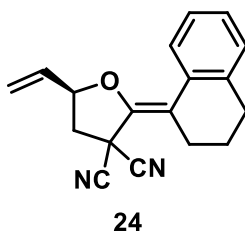

**Chiral HPLC:** 98% ee, Daicel Chiral pak IG column (1% IPA in hexanes, 1.0 mL/min),  $t_r$  = 19.0 min (major),  $t_r$  = 16.0 min (minor);

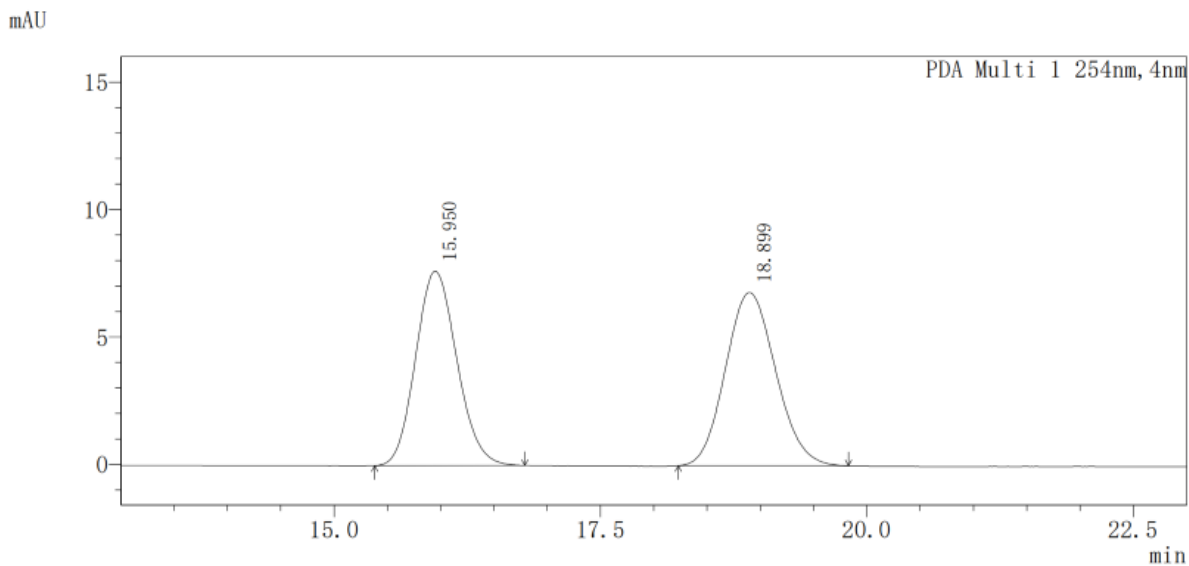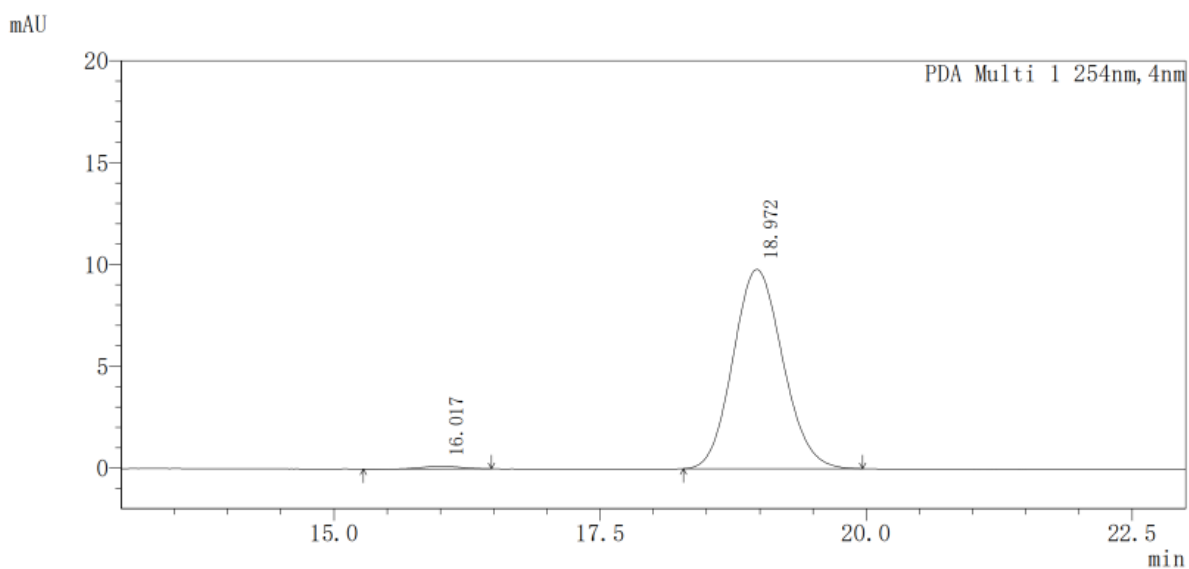

PDA Ch1 254nm

| Peak # | Ret. Time | Area   | Height | Area%   | Height% |
|--------|-----------|--------|--------|---------|---------|
| 1      | 16.017    | 3108   | 128    | 0.967   | 1.290   |
| 2      | 18.972    | 318353 | 9787   | 99.033  | 98.710  |
| 总计     |           | 321461 | 9915   | 100.000 | 100.000 |

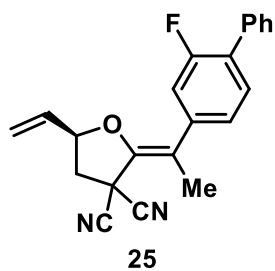

**Chiral HPLC:** 97% ee, Daicel Chiral pak IC column (1% IPA in hexanes, 1.0 mL/min),  $t_r$  = 18.1 min (major),  $t_r$  = 19.7 min (minor);

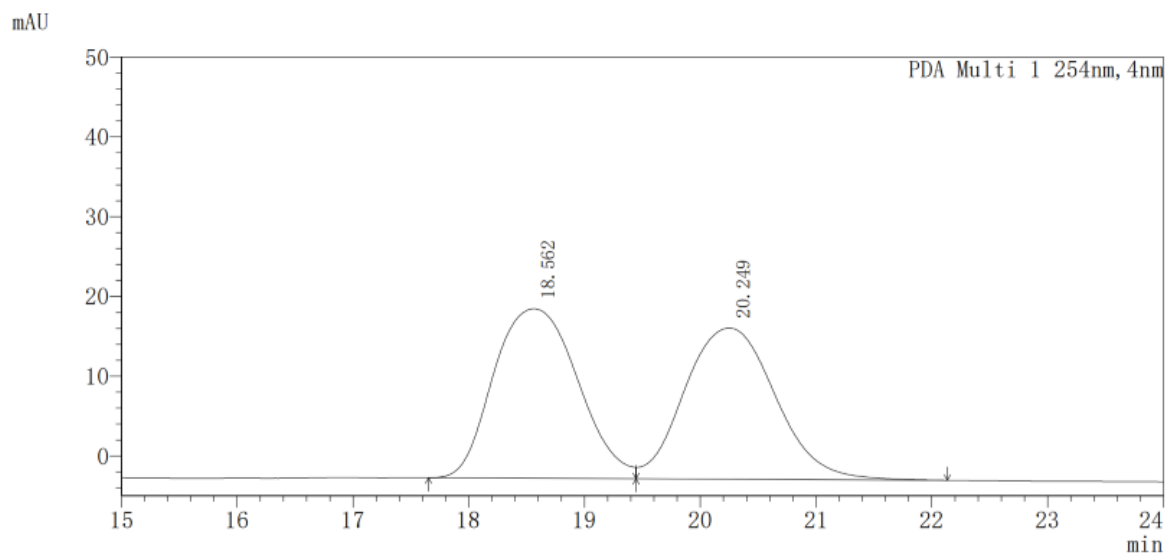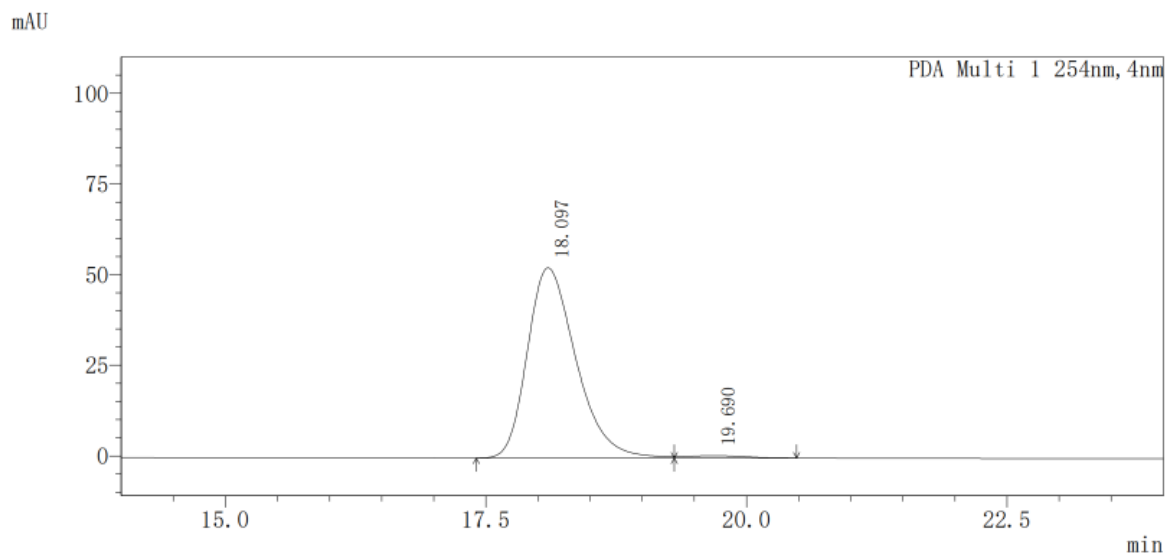

PDA Ch1 254nm

| Peak # | Ret. Time | Area    | Height | Area%   | Height% |
|--------|-----------|---------|--------|---------|---------|
| 1      | 18.097    | 1701568 | 52406  | 98.581  | 98.776  |
| 2      | 19.690    | 24495   | 649    | 1.419   | 1.224   |
| 总计     |           | 1726064 | 53055  | 100.000 | 100.000 |

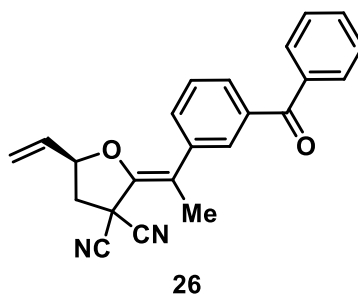

**Chiral HPLC:** 98% ee, Daicel Chiral pak IG column (5% IPA in hexanes, 1.0 mL/min),  $t_r$  = 48.1 min (major),  $t_r$  = 52.8 min (minor);

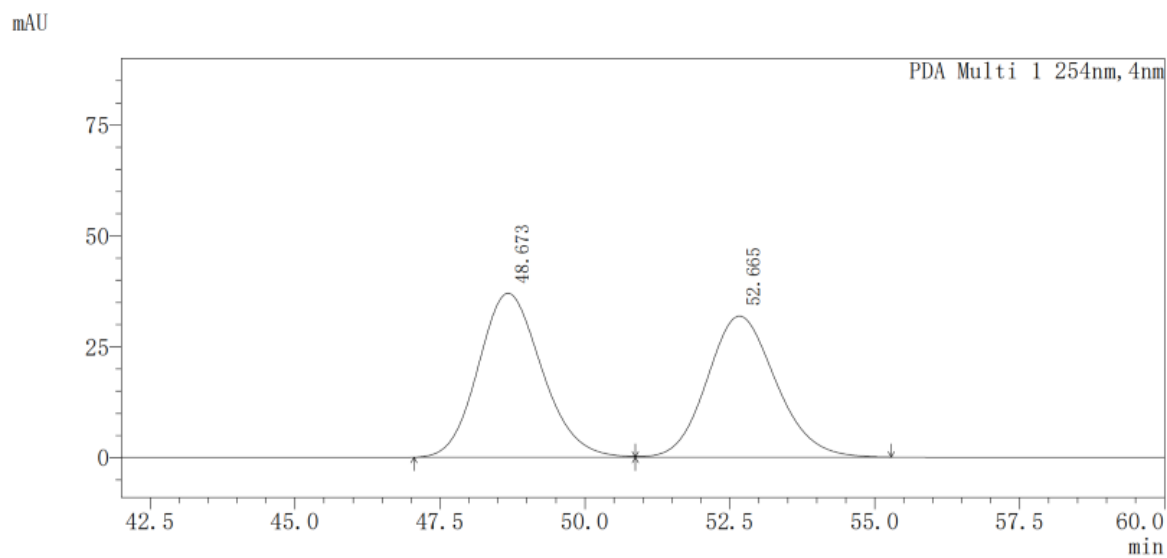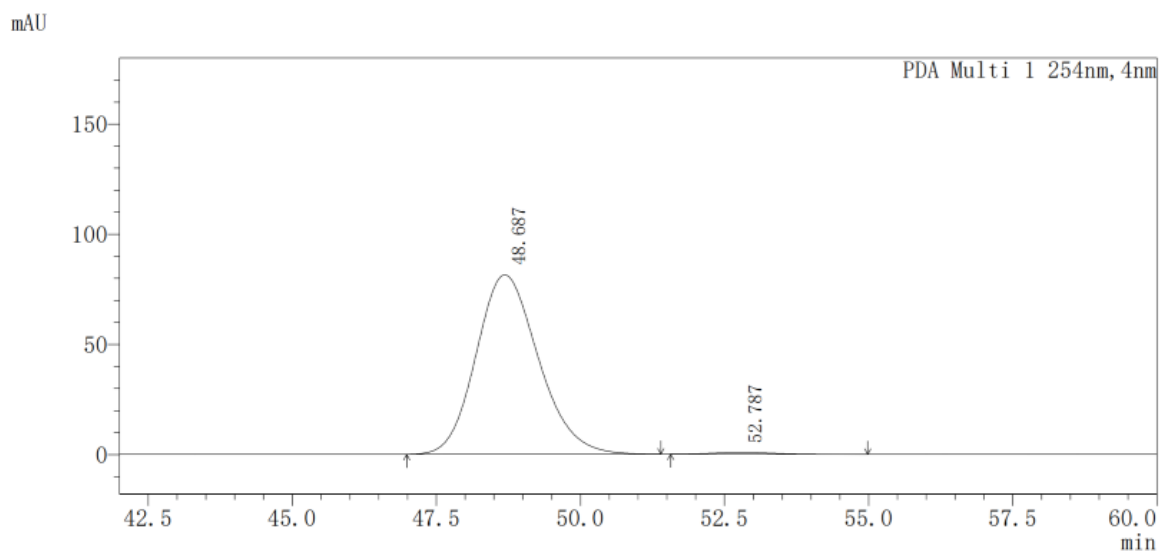

PDA Ch1 254nm

| Peak # | Ret. Time | Area    | Height | Area%   | Height% |
|--------|-----------|---------|--------|---------|---------|
| 1      | 48.687    | 6139658 | 81450  | 99.064  | 99.067  |
| 2      | 52.787    | 58039   | 767    | 0.936   | 0.933   |
| 总计     |           | 6197697 | 82217  | 100.000 | 100.000 |

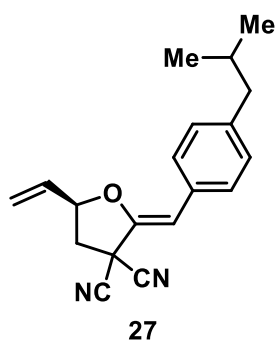

**Chiral HPLC:** 97% ee, Daicel Chiral pak IG column (1% IPA in hexanes, 1.0 mL/min),  $t_r$  = 23.2 min (major),  $t_r$  = 17.0 min (minor);

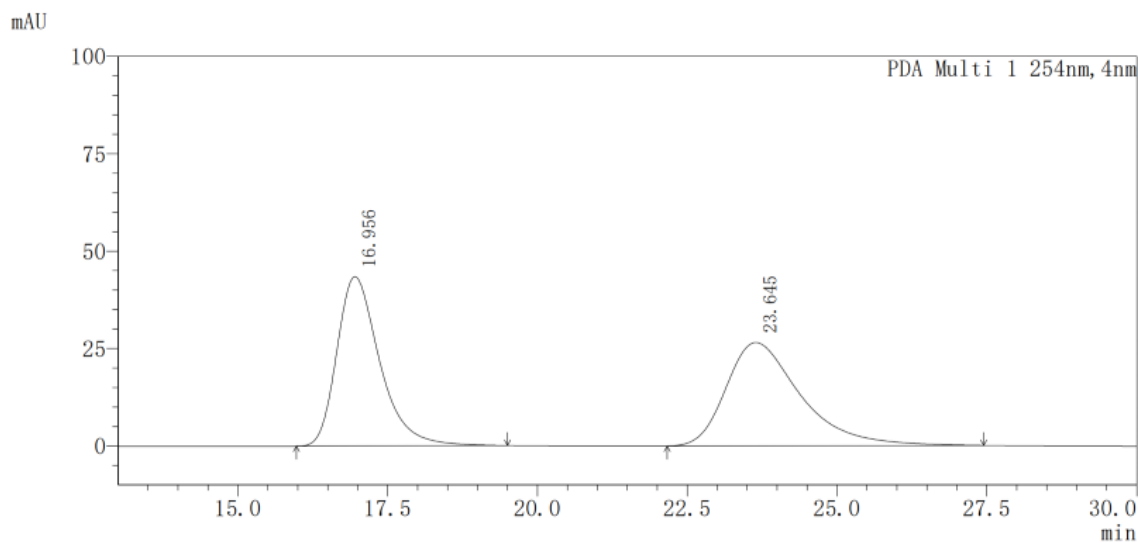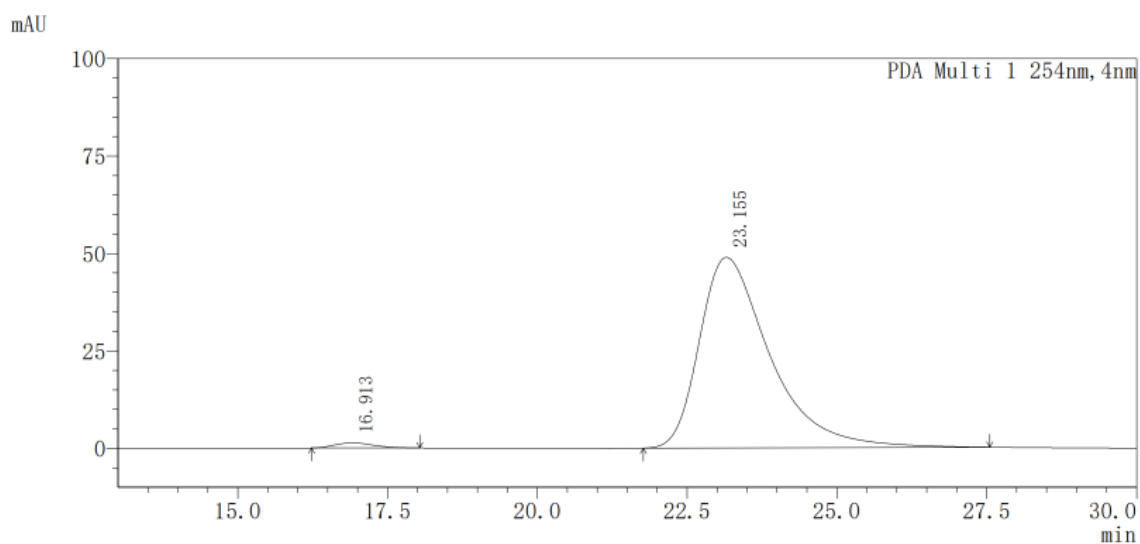

| Peak # | Ret. Time | Area    | Height | Area%   | Height% |
|--------|-----------|---------|--------|---------|---------|
| 1      | 16.913    | 60140   | 1334   | 1.479   | 2.656   |
| 2      | 23.155    | 4005752 | 48905  | 98.521  | 97.344  |
| 总计     |           | 4065892 | 50239  | 100.000 | 100.000 |

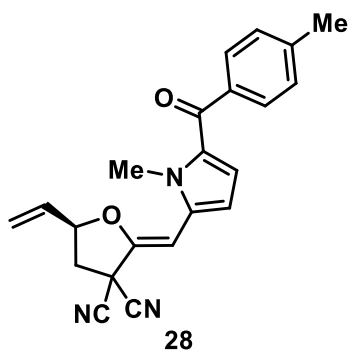

**Chiral HPLC:** 84% ee, Daicel Chiral pak IE column (10% IPA in hexanes, 1.0 mL/min),  $t_r$  = 41.5 min (major),  $t_r$  = 35.6 min (minor);

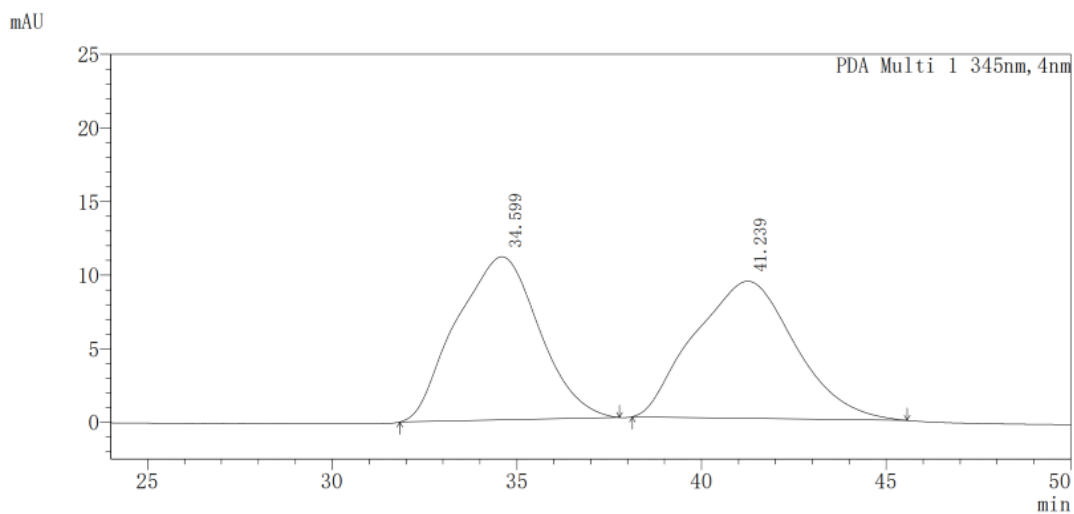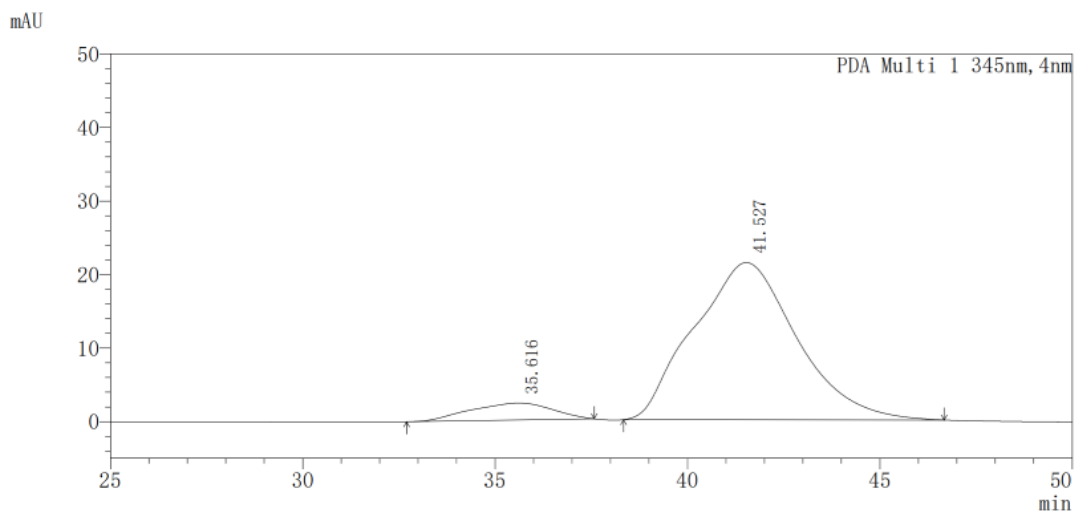

PDA Ch1 345nm

| Peak # | Ret. Time | Area    | Height | Area%   | Height% |
|--------|-----------|---------|--------|---------|---------|
| 1      | 35.616    | 343380  | 2315   | 7.925   | 9.766   |
| 2      | 41.527    | 3989500 | 21389  | 92.075  | 90.234  |
| 总计     |           | 4332881 | 23703  | 100.000 | 100.000 |

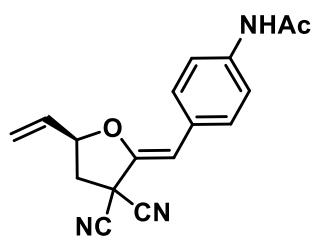

29

**Chiral HPLC:** 97% ee, Daicel Chiral pak IE column (10% IPA in hexanes, 1.0 mL/min),  $t_r$  = 17.1 min (major),  $t_r$  = 14.5 min (minor);

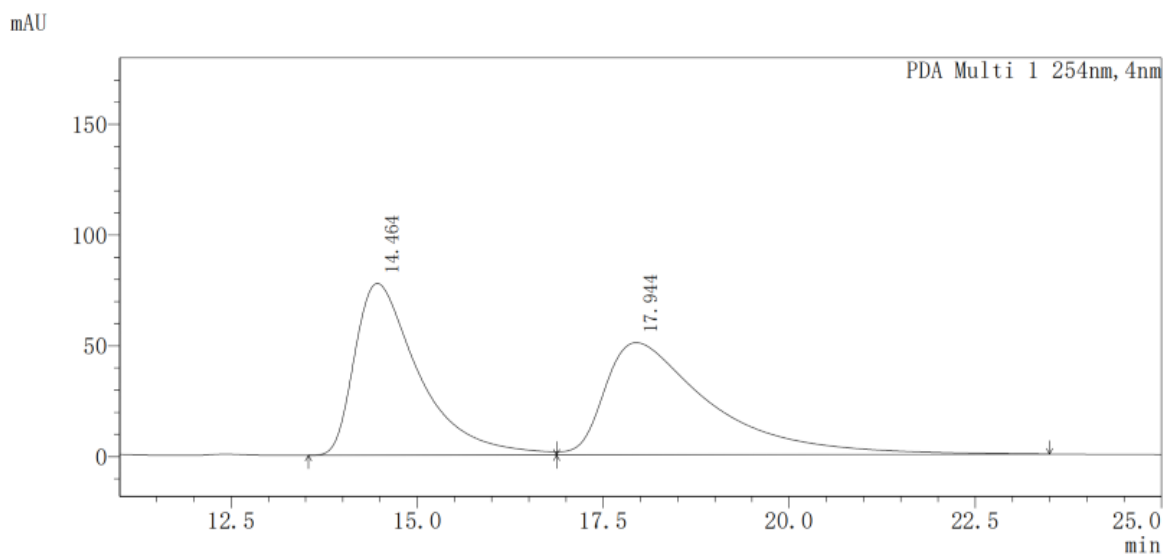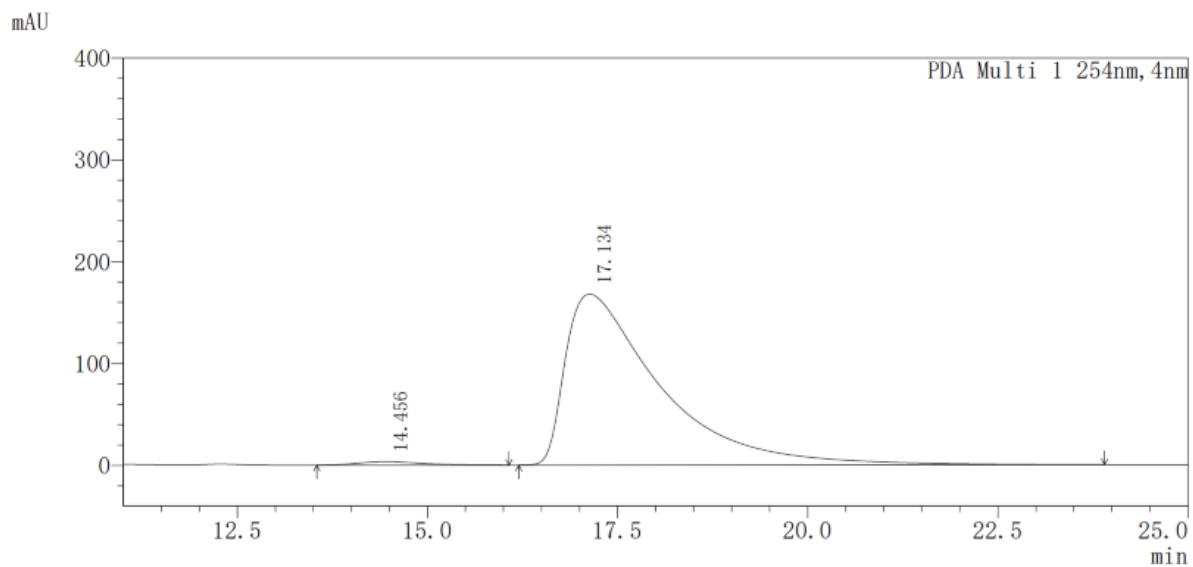

PDA Ch1 254nm

| Peak # | Ret. Time | Area     | Height | Area%   | Height% |
|--------|-----------|----------|--------|---------|---------|
| 1      | 14.456    | 199043   | 3448   | 1.346   | 2.012   |
| 2      | 17.134    | 14585654 | 167904 | 98.654  | 97.988  |
| 总计     |           | 14784697 | 171352 | 100.000 | 100.000 |

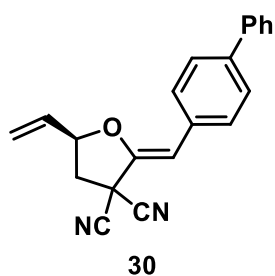

**Chiral HPLC:** 97% ee, Daicel Chiral pak IC column (1% IPA in hexanes, 1.0 mL/min),  $t_r$  = 32.8 min (major),  $t_r$  = 39.2 min (minor);

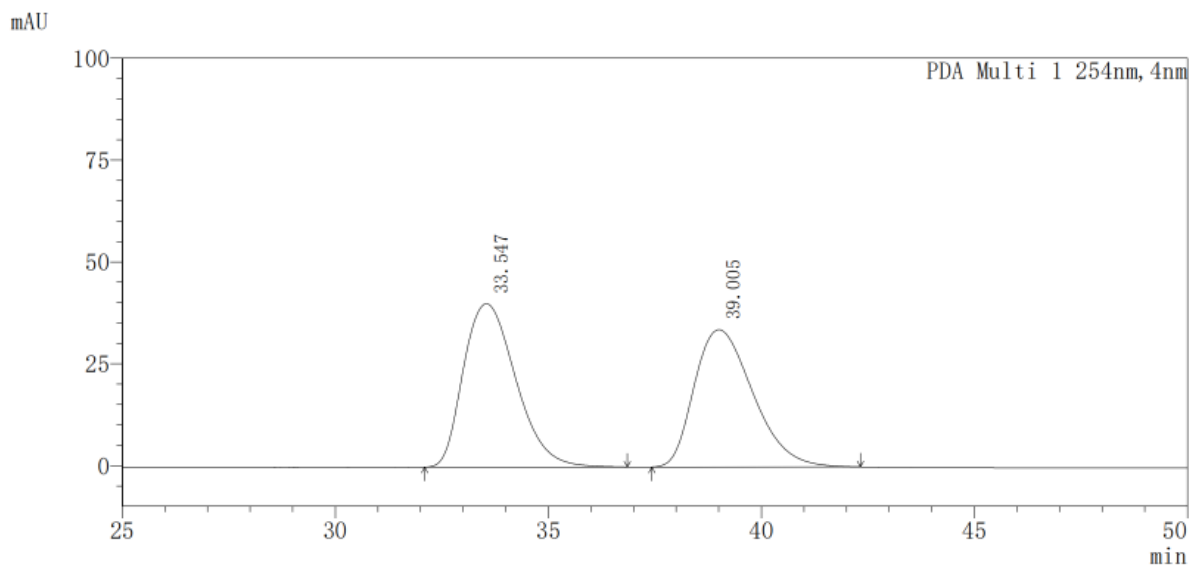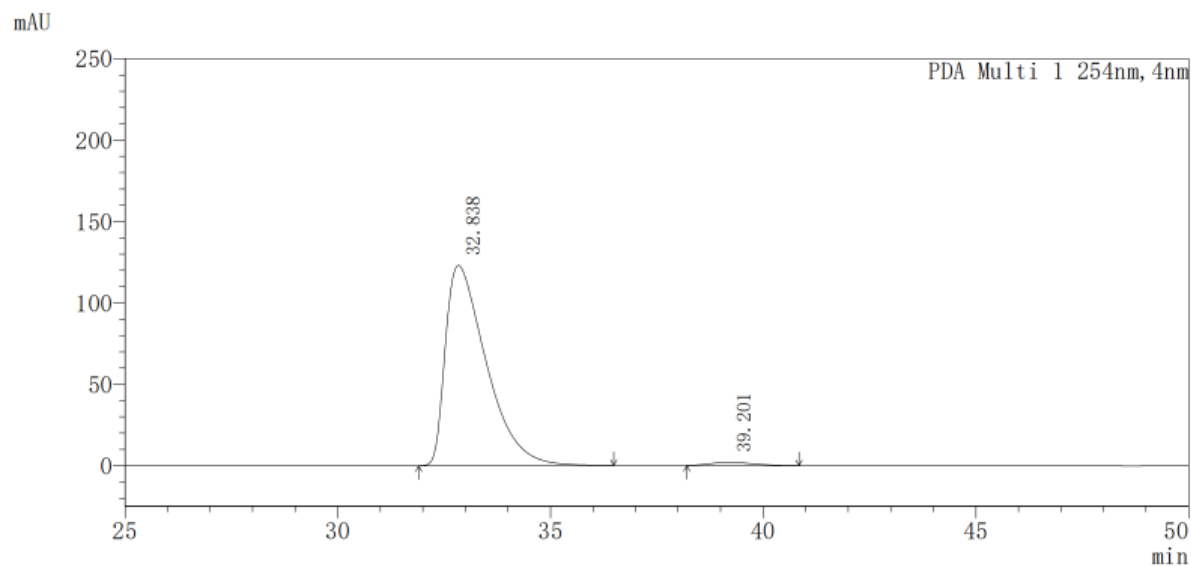

PDA Ch1 254nm

| Peak # | Ret. Time | Area    | Height | Area%   | Height% |
|--------|-----------|---------|--------|---------|---------|
| 1      | 32.838    | 8221303 | 122934 | 98.316  | 98.351  |
| 2      | 39.201    | 140831  | 2061   | 1.684   | 1.649   |
| 总计     |           | 8362134 | 124996 | 100.000 | 100.000 |

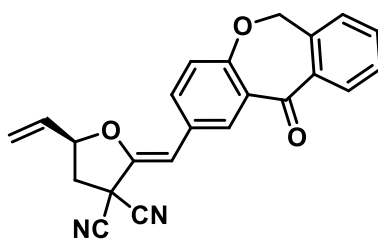

31

**Chiral HPLC:** 98% ee, Daicel Chiral pak IC column (10% IPA in hexanes, 1.0 mL/min),  $t_r$  = 48.7 min (major),  $t_r$  = 45.4 min (minor);

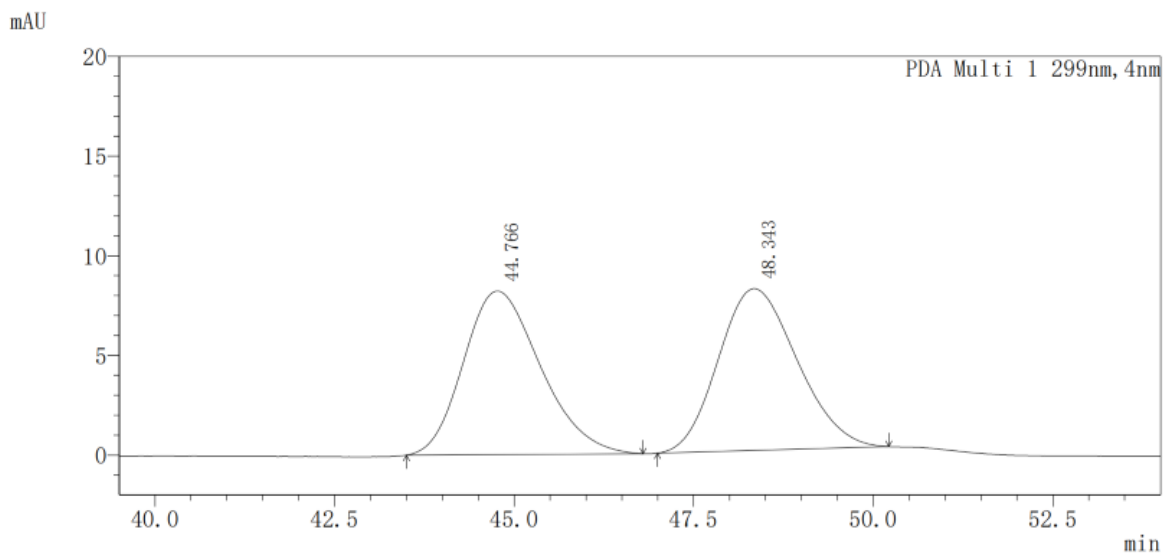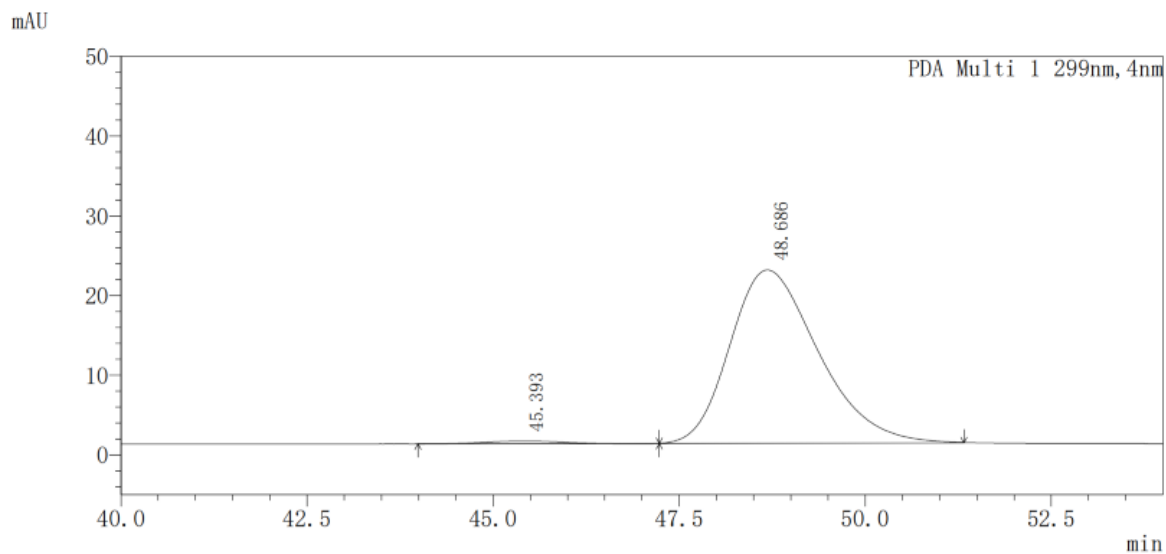

| PDA Ch1 299nm |           |         |        |         |         |
|---------------|-----------|---------|--------|---------|---------|
| Peak #        | Ret. Time | Area    | Height | Area%   | Height% |
| 1             | 45.393    | 21168   | 327    | 1.165   | 1.482   |
| 2             | 48.686    | 1795918 | 21731  | 98.835  | 98.518  |
| 总计            |           | 1817086 | 22058  | 100.000 | 100.000 |

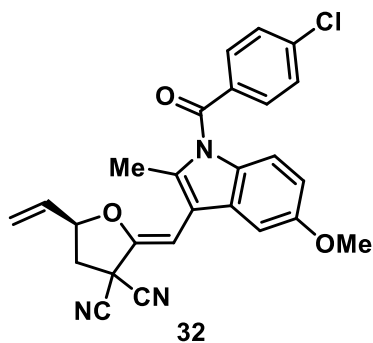

**Chiral HPLC:** 98% ee, Daicel Chiral pak IA column (10% IPA in hexanes, 1.0 mL/min),  $t_r$  = 24.1 min (major),  $t_r$  = 20.3 min (minor);

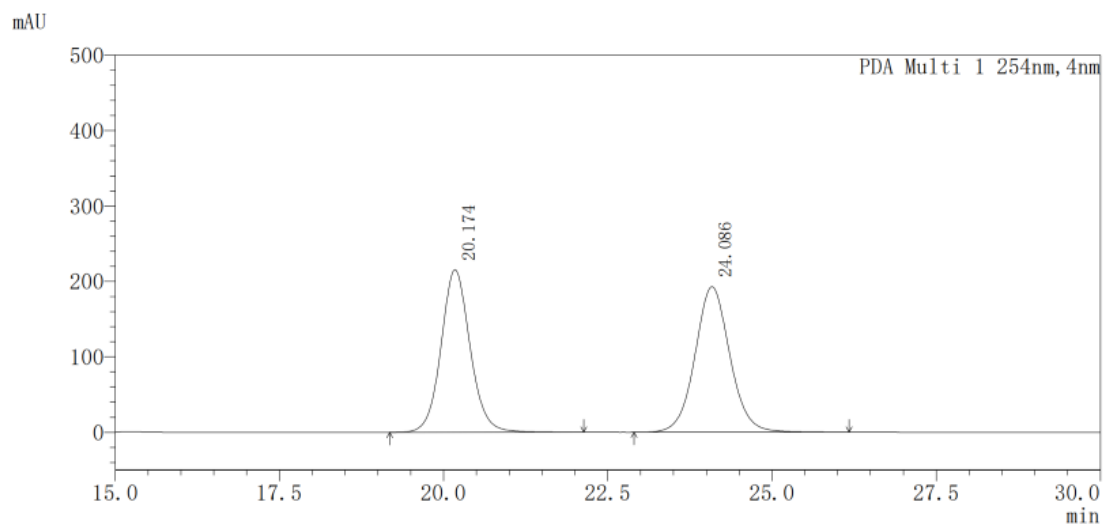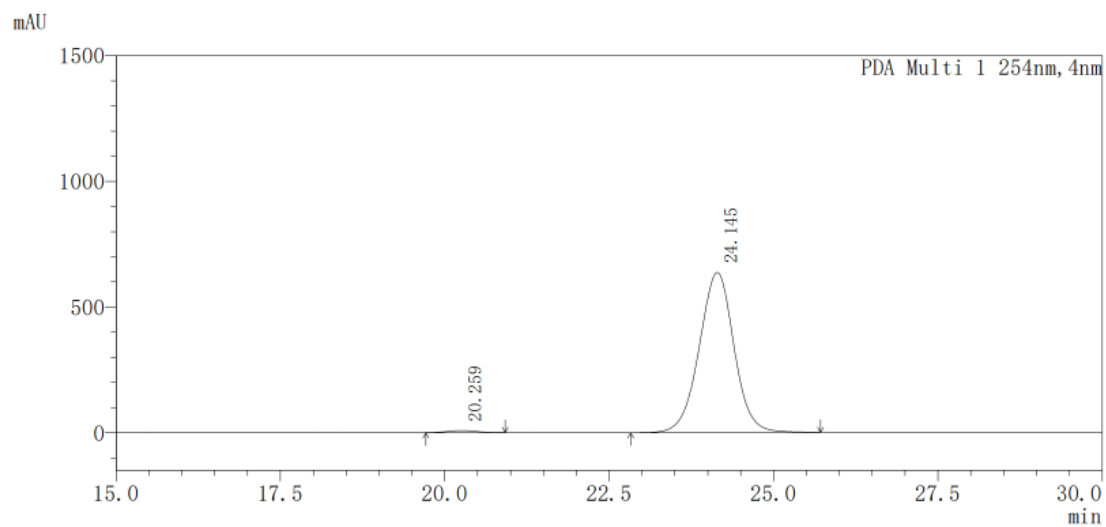

PDA Ch1 254nm

| Peak # | Ret. Time | Area     | Height | Area%   | Height% |
|--------|-----------|----------|--------|---------|---------|
| 1      | 20.259    | 268134   | 8759   | 1.124   | 1.355   |
| 2      | 24.145    | 23588471 | 637576 | 98.876  | 98.645  |
| 总计     |           | 23856605 | 646335 | 100.000 | 100.000 |

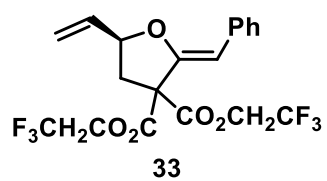

**Chiral HPLC:** 95% ee, Daicel Chiral pak IA column (1% IPA in hexanes, 1.0 mL/min),  $t_r$  = 8.7 min (major),  $t_r$  = 7.9 min (minor);

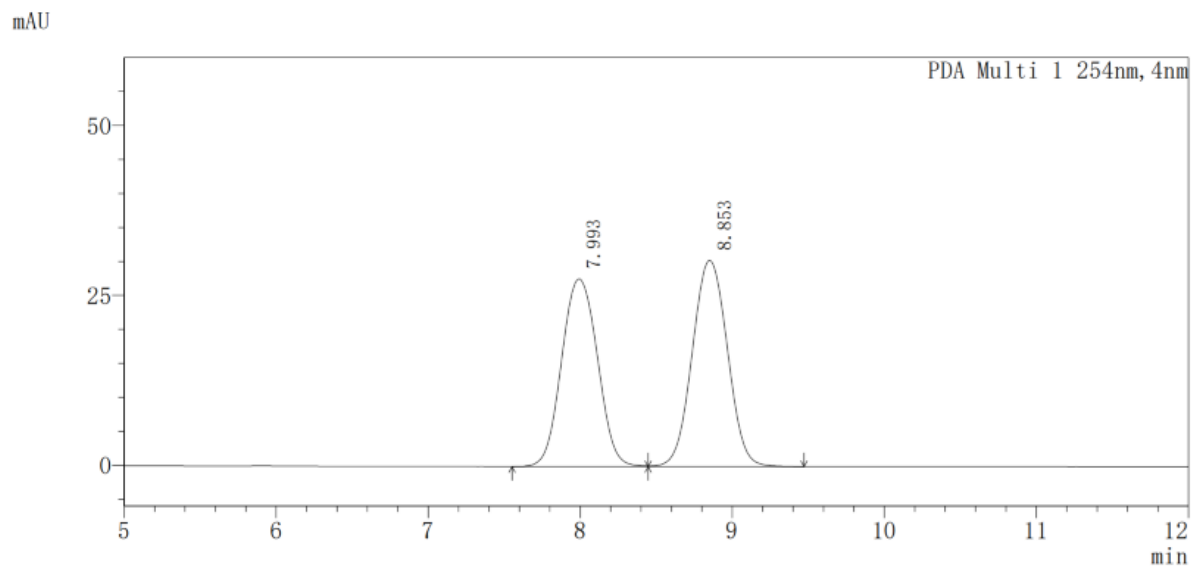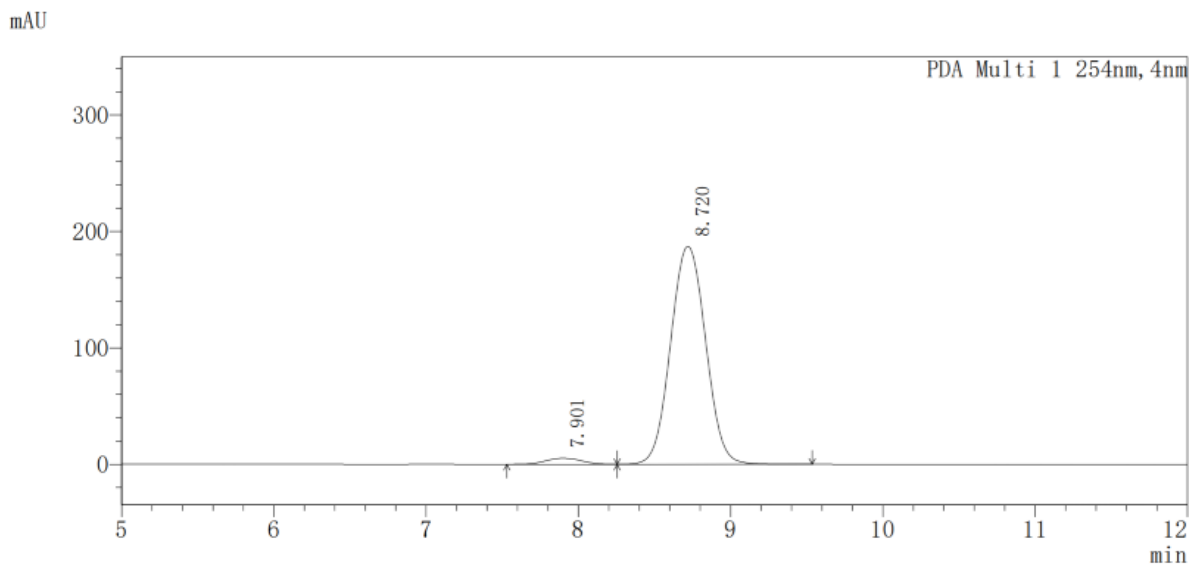

PDA Ch1 254nm

| Peak # | Ret. Time | Area    | Height | Area%   | Height% |
|--------|-----------|---------|--------|---------|---------|
| 1      | 7.901     | 84453   | 5171   | 2.739   | 2.689   |
| 2      | 8.720     | 2998480 | 187157 | 97.261  | 97.311  |
| 总计     |           | 3082932 | 192328 | 100.000 | 100.000 |

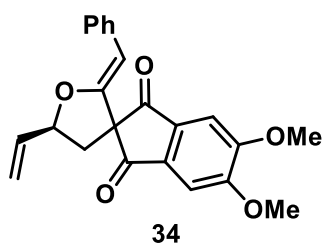

**Chiral HPLC:** 95% ee, Daicel Chiral pak IC column (10% IPA in hexanes, 1.0 mL/min),  $t_r$  = 12.9 min (major),  $t_r$  = 14.9 min (minor);

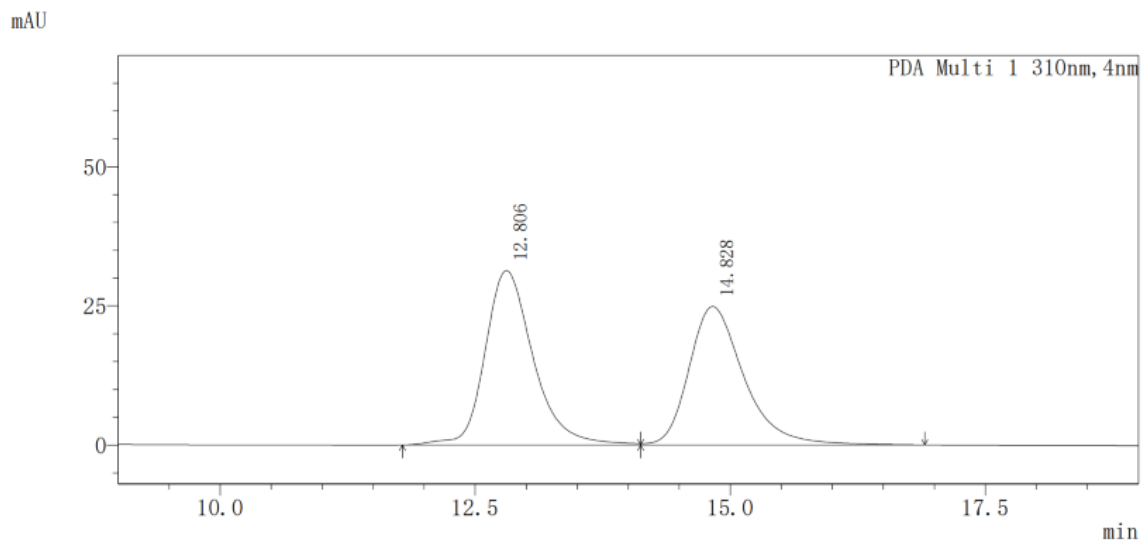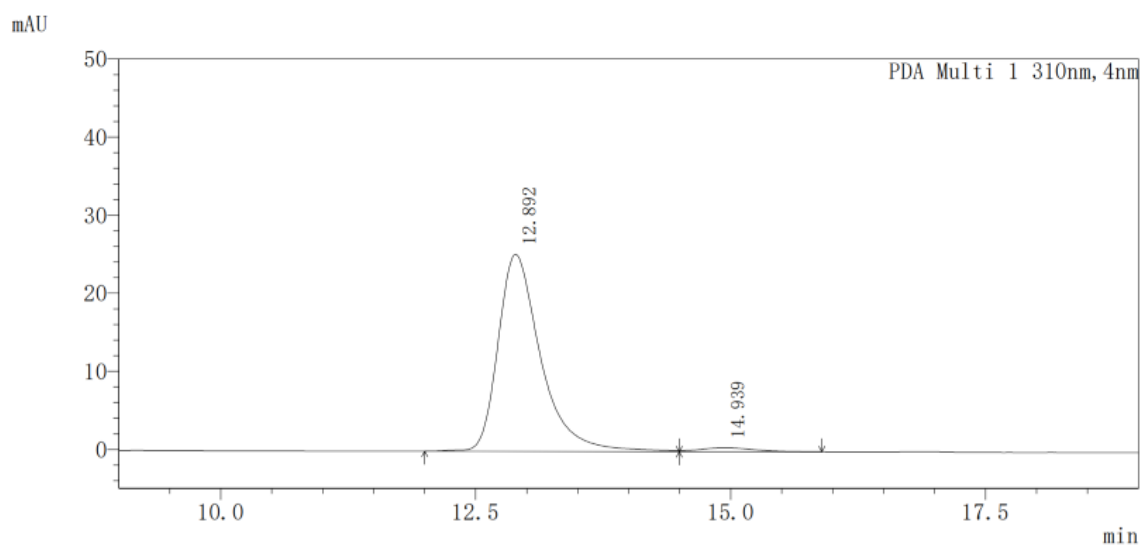

PDA Ch1 310nm

| Peak # | Ret. Time | Area   | Height | Area%   | Height% |
|--------|-----------|--------|--------|---------|---------|
| 1      | 12.892    | 735862 | 25234  | 97.499  | 97.988  |
| 2      | 14.939    | 18873  | 518    | 2.501   | 2.012   |
| 总计     |           | 754735 | 25753  | 100.000 | 100.000 |

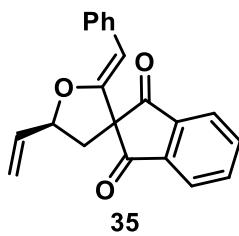

**Chiral HPLC:** 97% ee, Daicel Chiral pak IC column (1% IPA in hexanes, 1.0 mL/min),  $t_r$  = 19.7 min (major),  $t_r$  = 22.5 min (minor);

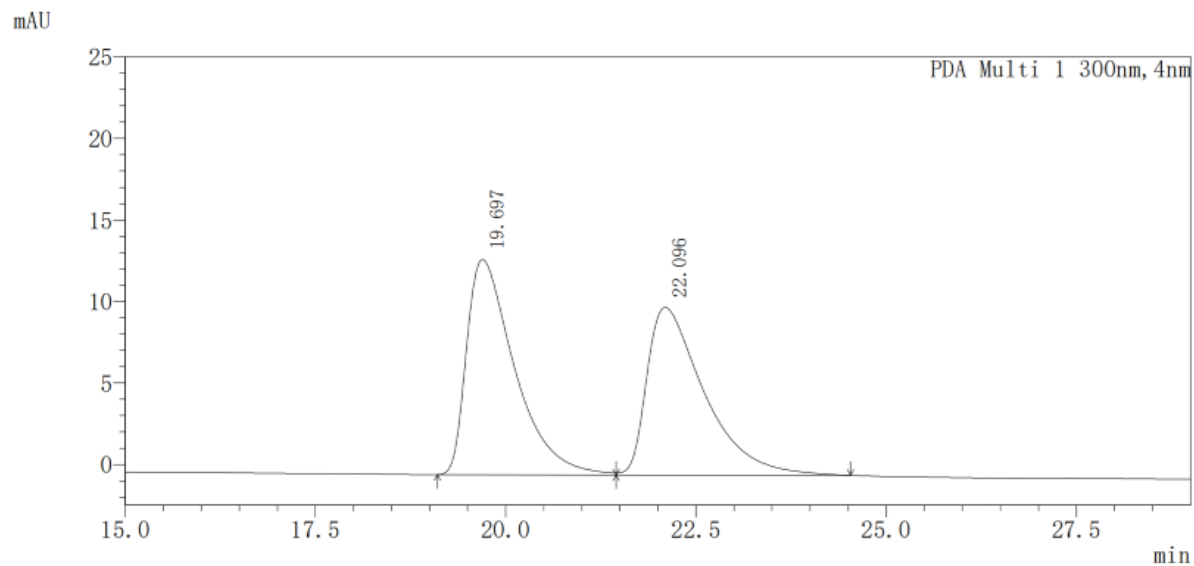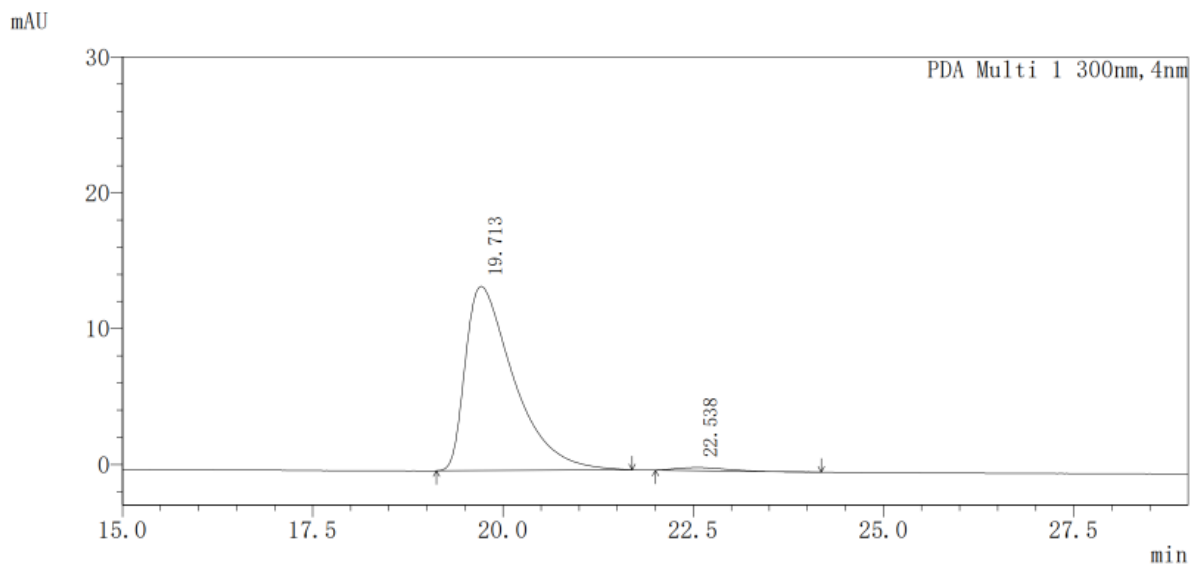

PDA Ch1 300nm

| Peak # | Ret. Time | Area   | Height | Area%   | Height% |
|--------|-----------|--------|--------|---------|---------|
| 1      | 19.713    | 603004 | 13565  | 98.446  | 98.373  |
| 2      | 22.538    | 9517   | 224    | 1.554   | 1.627   |
| 总计     |           | 612520 | 13790  | 100.000 | 100.000 |

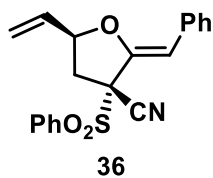

**Chiral HPLC:** 97% ee, Daicel Chiral pak IA column (1% IPA in hexanes, 1.0 mL/min),  $t_r$  = 18.3 min (major),  $t_r$  = 16.7 min (minor);

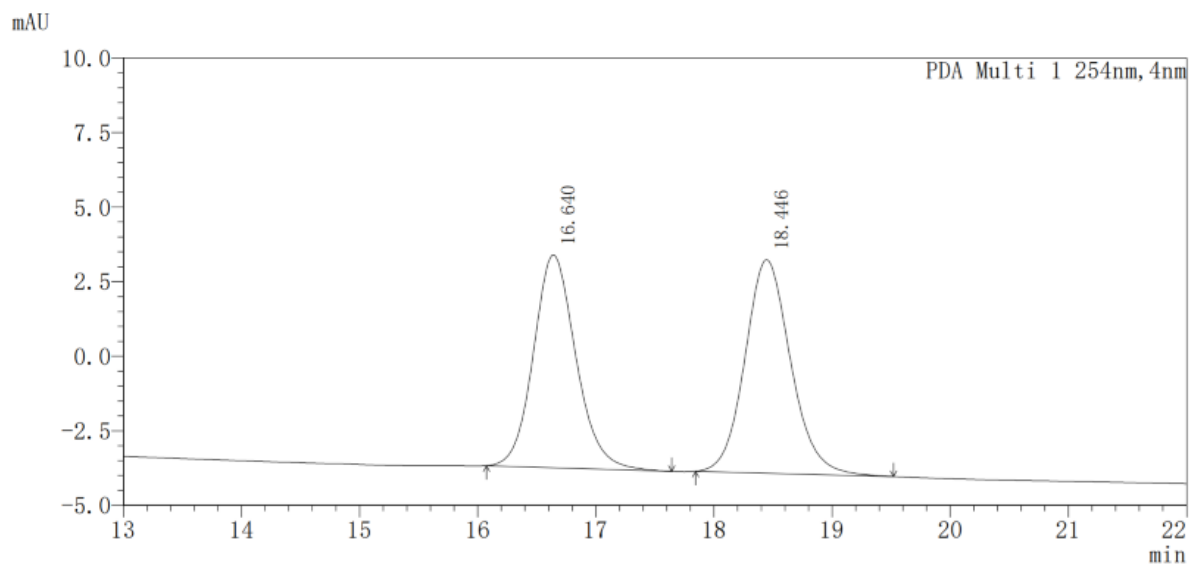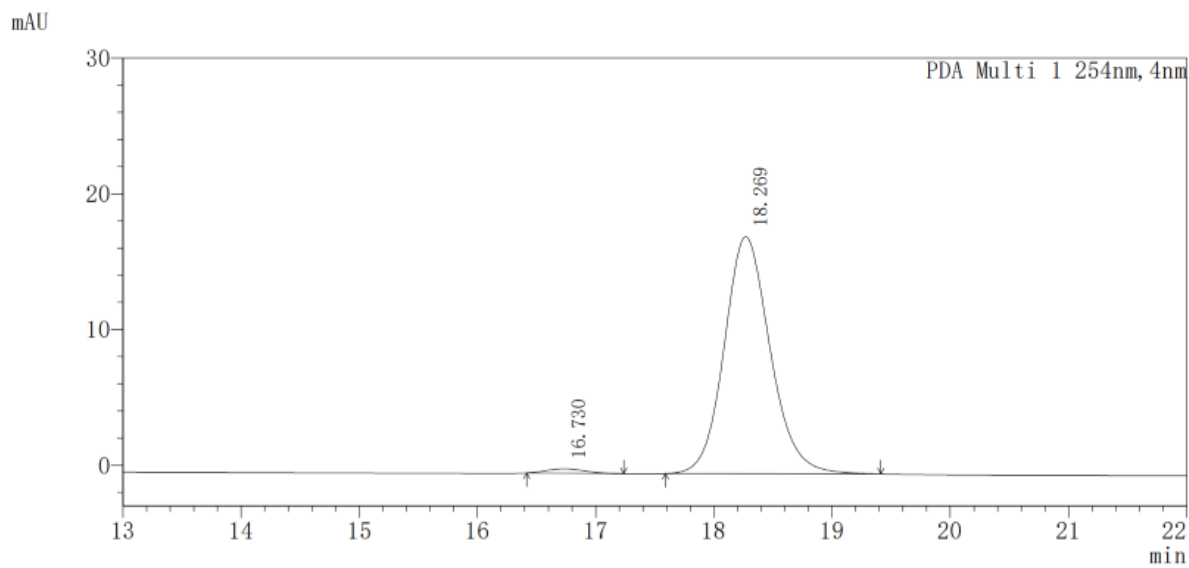

PDA Ch1 254nm

| Peak # | Ret. Time | Area   | Height | Area%   | Height% |
|--------|-----------|--------|--------|---------|---------|
| 1      | 16.730    | 7335   | 328    | 1.528   | 1.844   |
| 2      | 18.269    | 472648 | 17466  | 98.472  | 98.156  |
| 总计     |           | 479983 | 17794  | 100.000 | 100.000 |

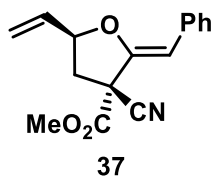

**Chiral HPLC:** 93% ee, Daicel Chiral pak IC column (1% IPA in hexanes, 1.0 mL/min),  $t_r$  = 20.7 min (major),  $t_r$  = 18.1 min (minor);

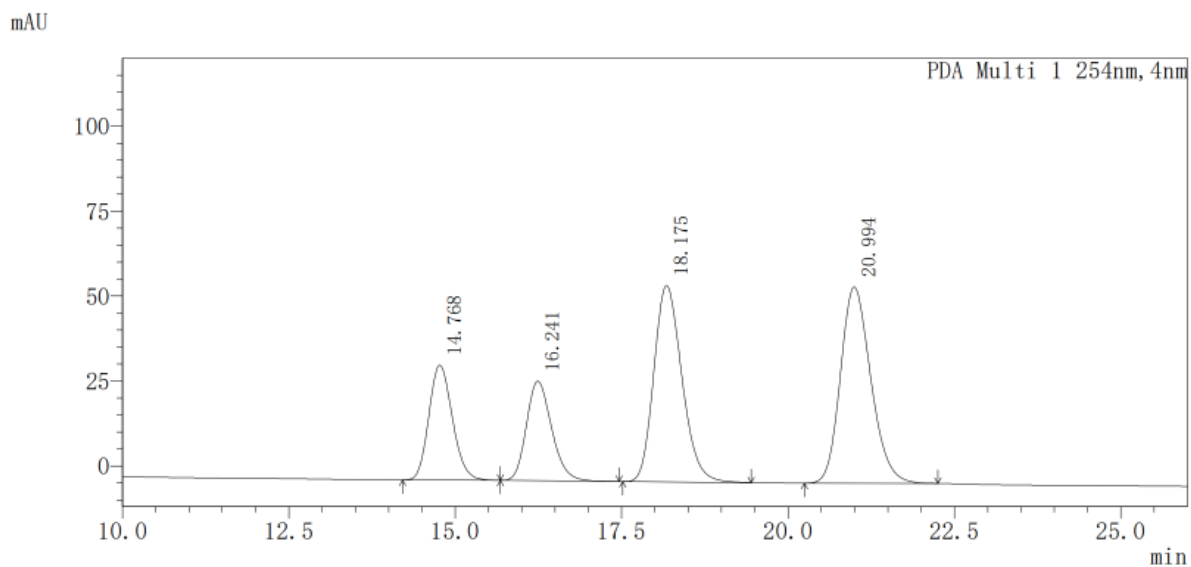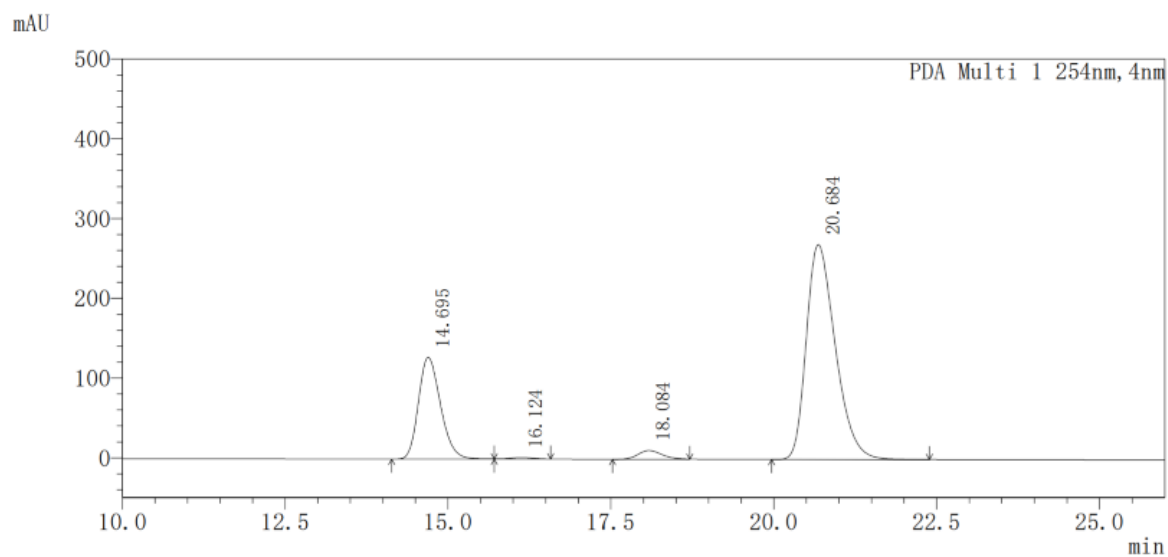

PDA Ch1 254nm

| Peak # | Ret. Time | Area     | Height | Area%   | Height% |
|--------|-----------|----------|--------|---------|---------|
| 1      | 14.695    | 3018567  | 127655 | 25.770  | 31.118  |
| 2      | 16.124    | 53698    | 2038   | 0.458   | 0.497   |
| 3      | 18.084    | 290262   | 11059  | 2.478   | 2.696   |
| 4      | 20.684    | 8351139  | 269474 | 71.294  | 65.689  |
| 总计     |           | 11713665 | 410226 | 100.000 | 100.000 |

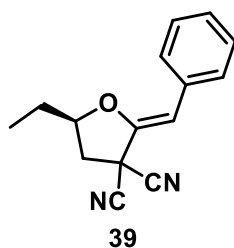

**Chiral HPLC:** 97% ee, Daicel Chiral pak IC column (1% IPA in hexanes, 1.0 mL/min),  $t_r$  = 15.1 min (major),  $t_r$  = 19.6 min (minor);

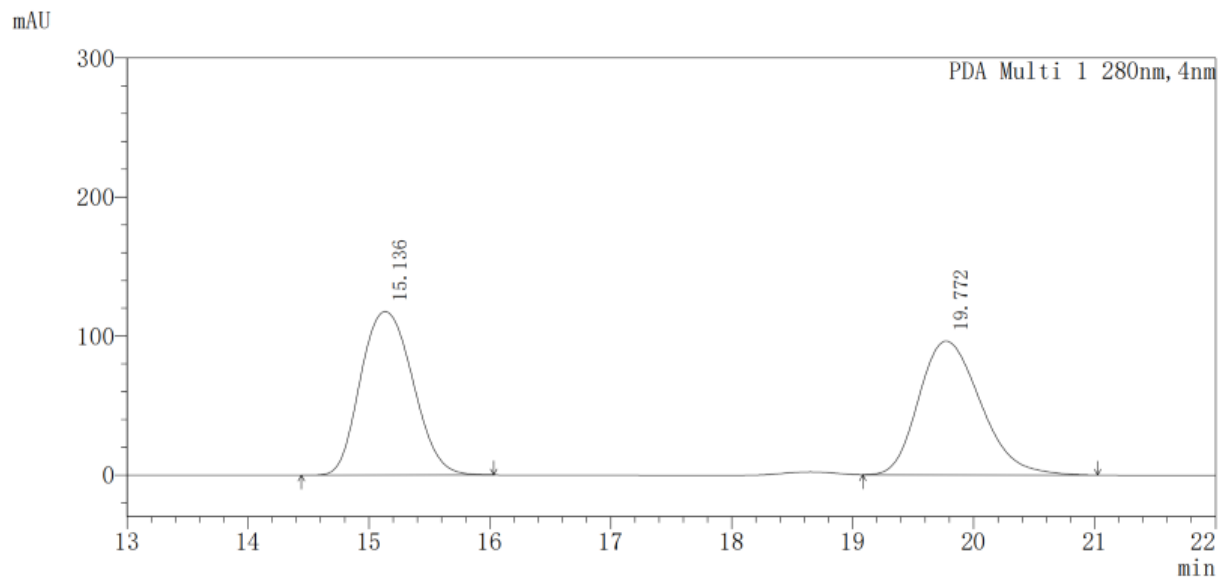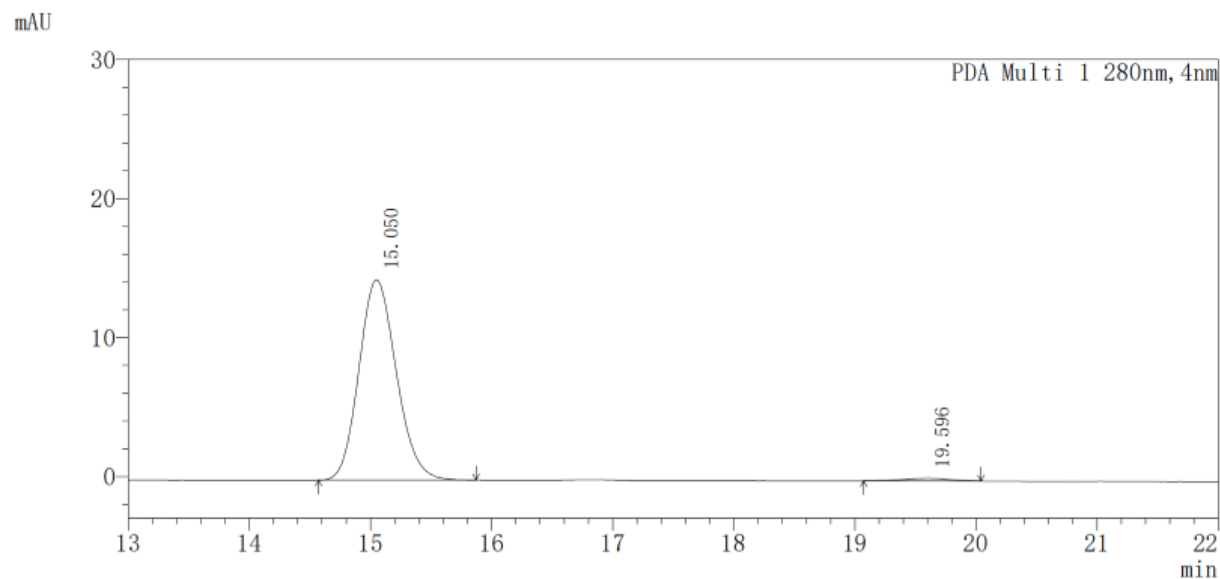

PDA Ch1 280nm

| Peak # | Ret. Time | Area   | Height | Area%   | Height% |
|--------|-----------|--------|--------|---------|---------|
| 1      | 15.050    | 309354 | 14421  | 98.377  | 98.729  |
| 2      | 19.596    | 5102   | 186    | 1.623   | 1.271   |
| 总计     |           | 314456 | 14607  | 100.000 | 100.000 |

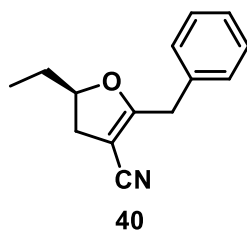

**Chiral HPLC:** 97% ee, Daicel Chiral pak IC column (1% IPA in hexanes, 1.0 mL/min),  $t_r$  = 20.5 min (major),  $t_r$  = 21.8 min (minor);

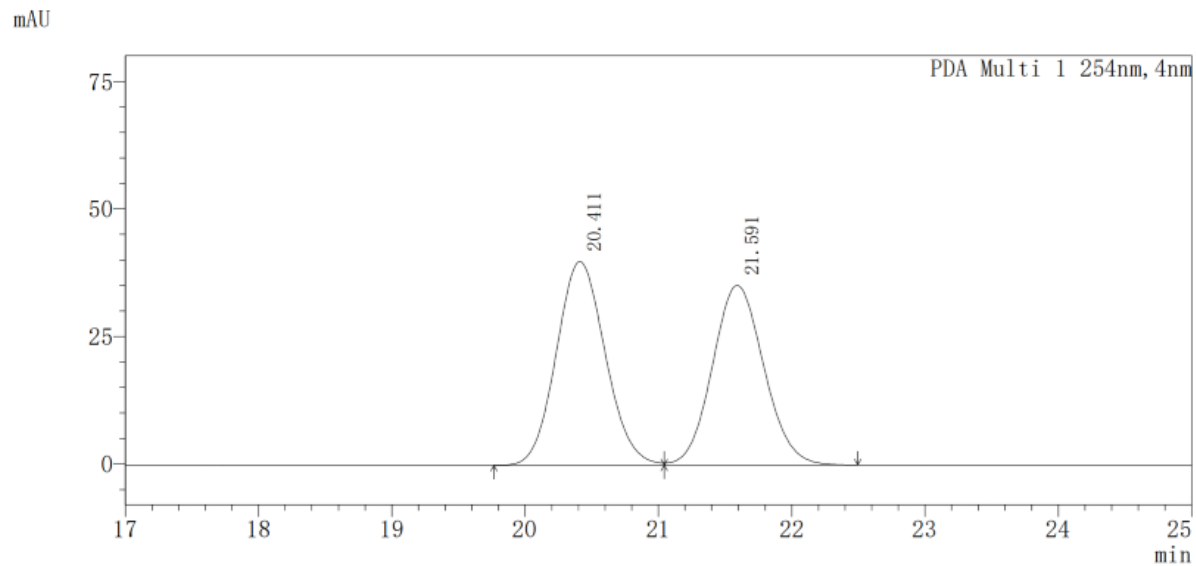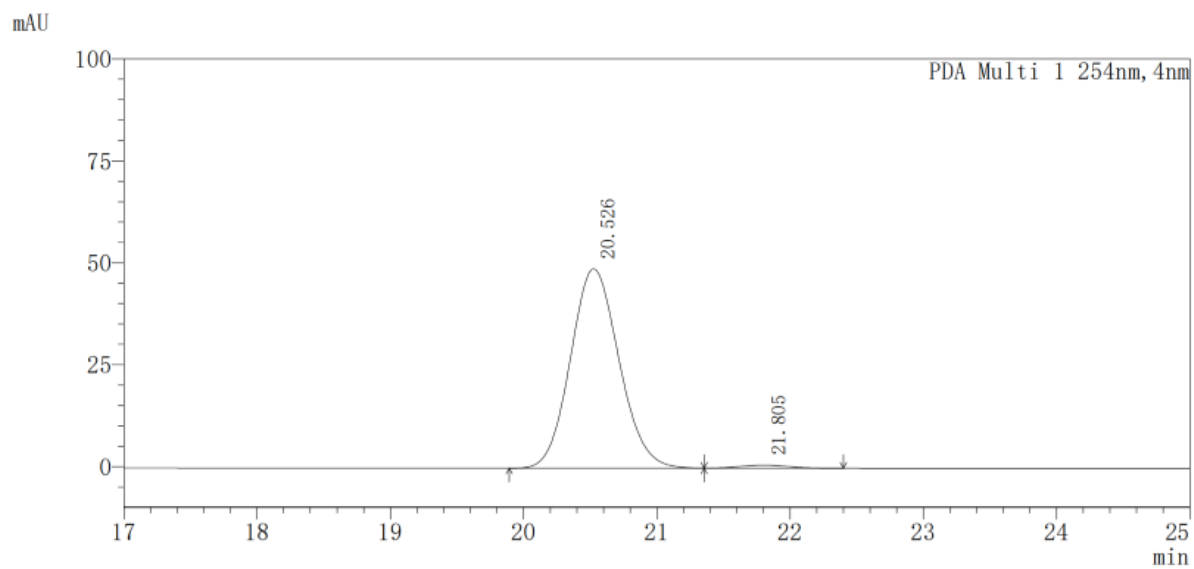

PDA Ch1 254nm

| Peak # | Ret. Time | Area    | Height | Area%   | Height% |
|--------|-----------|---------|--------|---------|---------|
| 1      | 20.526    | 1239650 | 48906  | 98.384  | 98.476  |
| 2      | 21.805    | 20356   | 757    | 1.616   | 1.524   |
| 总计     |           | 1260006 | 49663  | 100.000 | 100.000 |

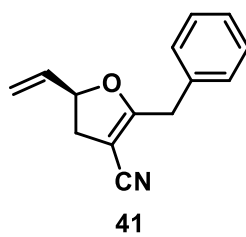

**Chiral HPLC:** 97% ee, Daicel Chiral pak IG column (5% IPA in hexanes, 1.0 mL/min),  $t_r$  = 9.4 min (major),  $t_r$  = 8.7 min (minor);

mAU

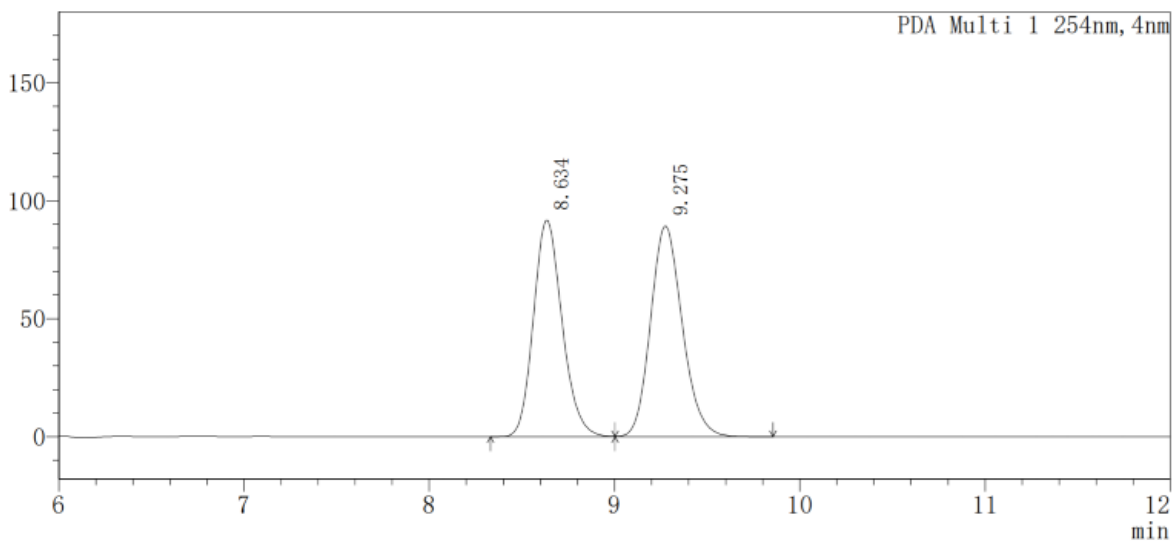

mAU

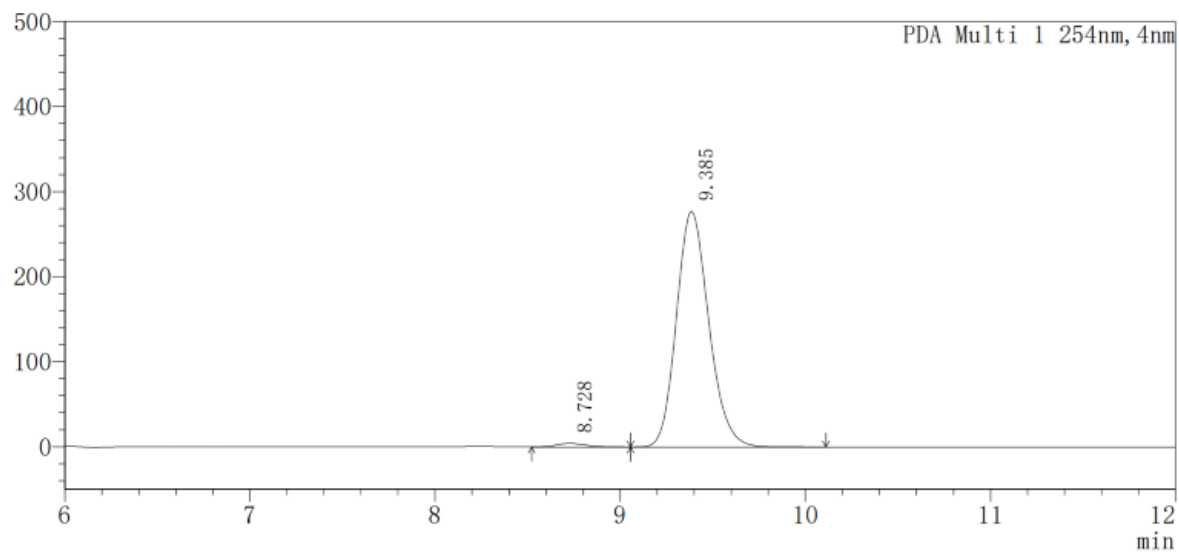

PDA Ch1 254nm

| Peak # | Ret. Time | Area    | Height | Area%   | Height% |
|--------|-----------|---------|--------|---------|---------|
| 1      | 8.728     | 45445   | 4200   | 1.333   | 1.492   |
| 2      | 9.385     | 3362906 | 277318 | 98.667  | 98.508  |
| 总计     |           | 3408351 | 281518 | 100.000 | 100.000 |

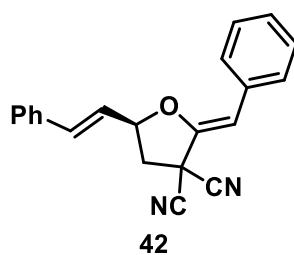

**Chiral HPLC:** 96% ee, Daicel Chiral pak IA column (5% IPA in hexanes, 1.0 mL/min),  $t_r$  = 10.2 min (major),  $t_r$  = 9.2 min (minor);

mAU

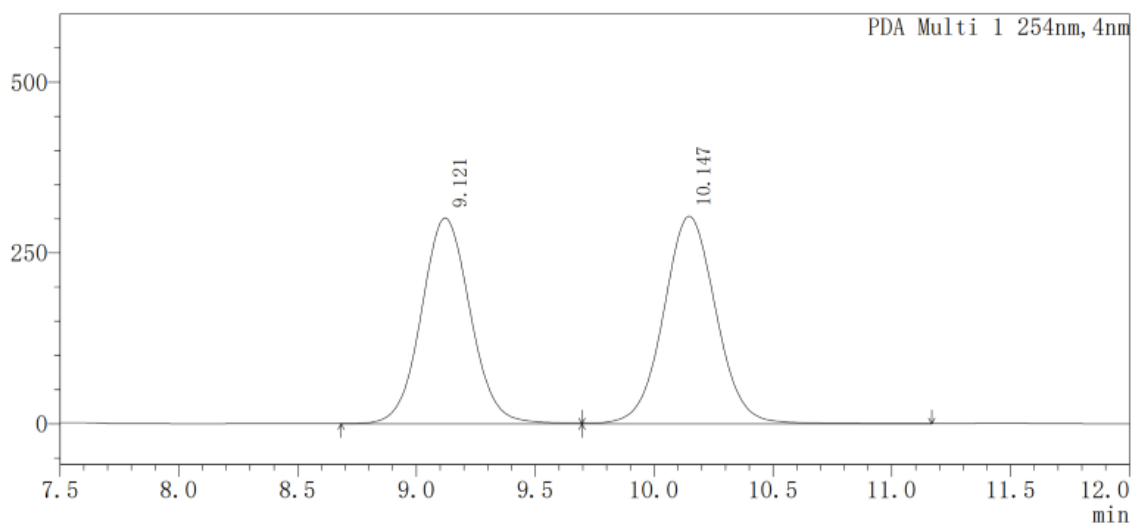

mAU

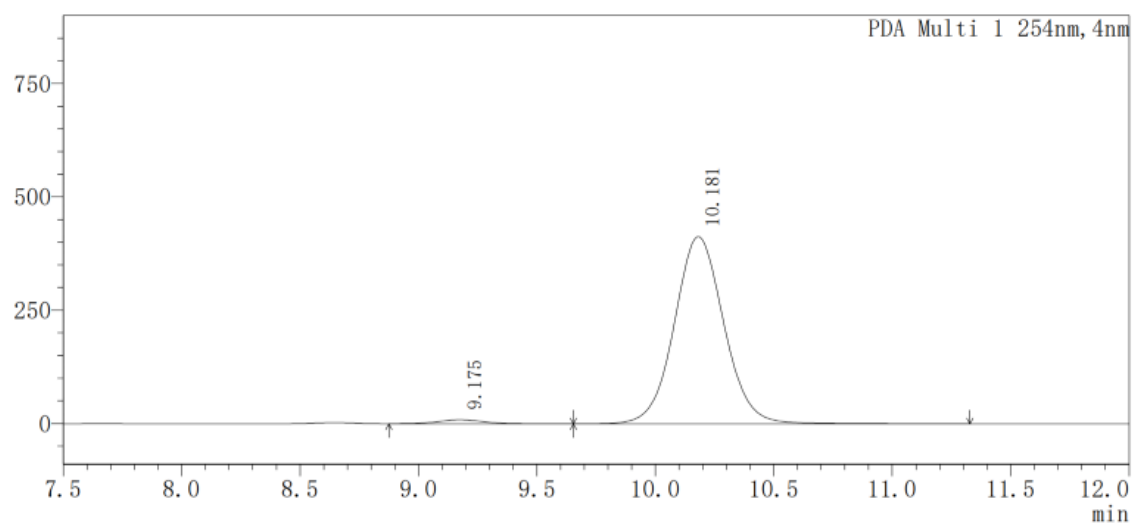

PDA Ch1 254nm

| Peak # | Ret. Time | Area    | Height | Area%   | Height% |
|--------|-----------|---------|--------|---------|---------|
| 1      | 9.175     | 122123  | 8904   | 1.986   | 2.111   |
| 2      | 10.181    | 6028108 | 412875 | 98.014  | 97.889  |
| 总计     |           | 6150232 | 421779 | 100.000 | 100.000 |

## VIII. NMR Spectra

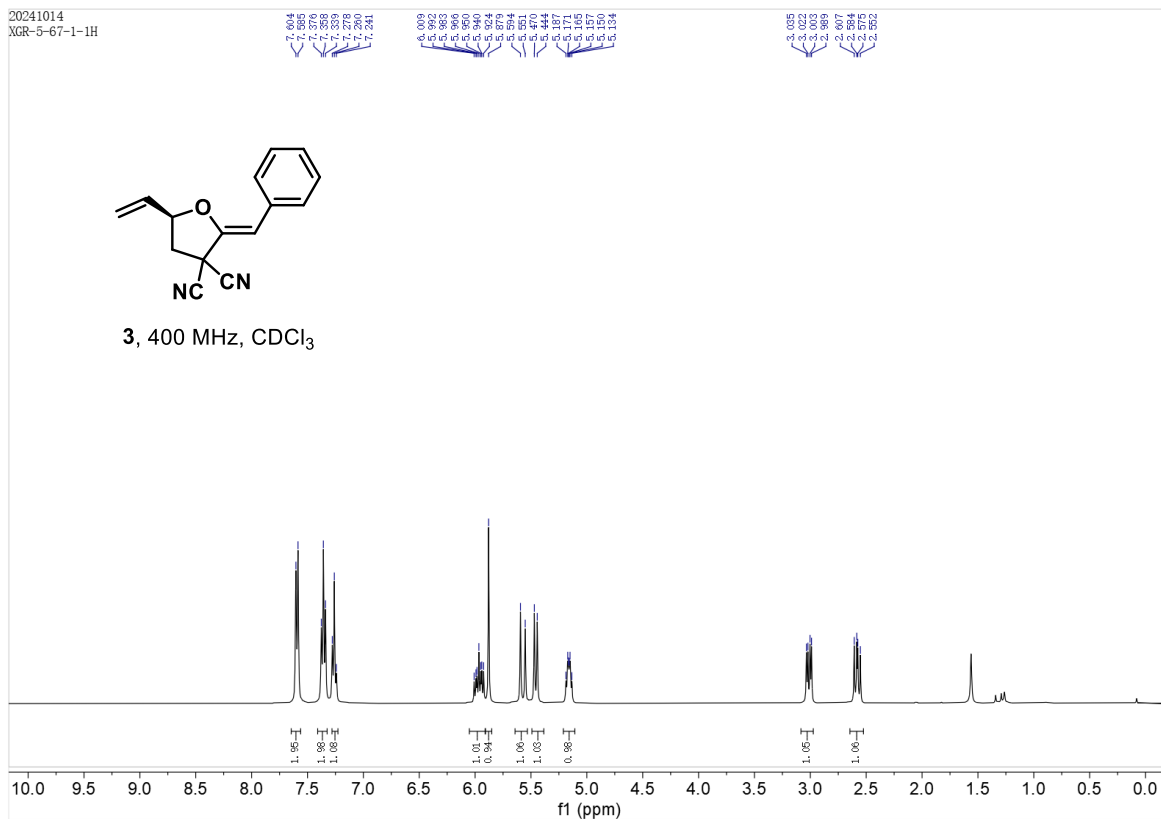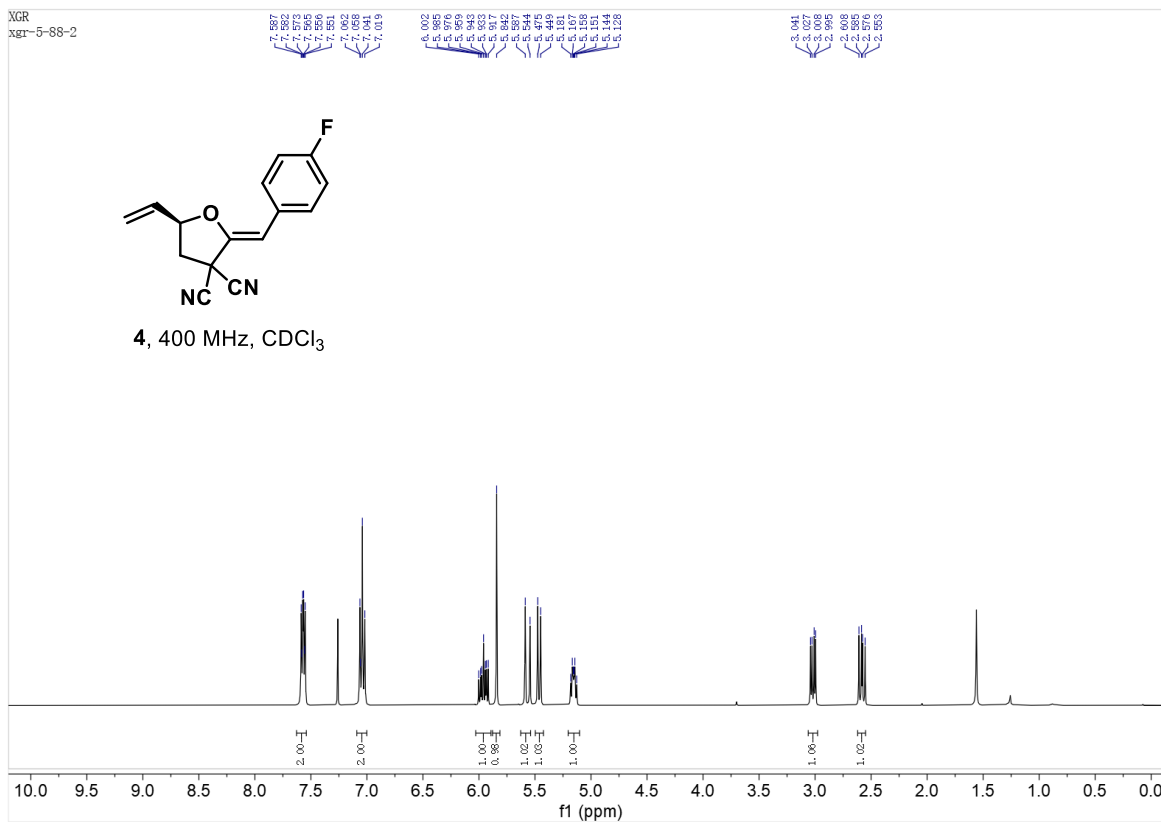

3.046  
3.033  
3.014  
3.001

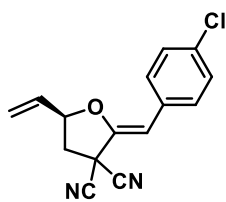

**5, 400 MHz, CDCl<sub>3</sub>**

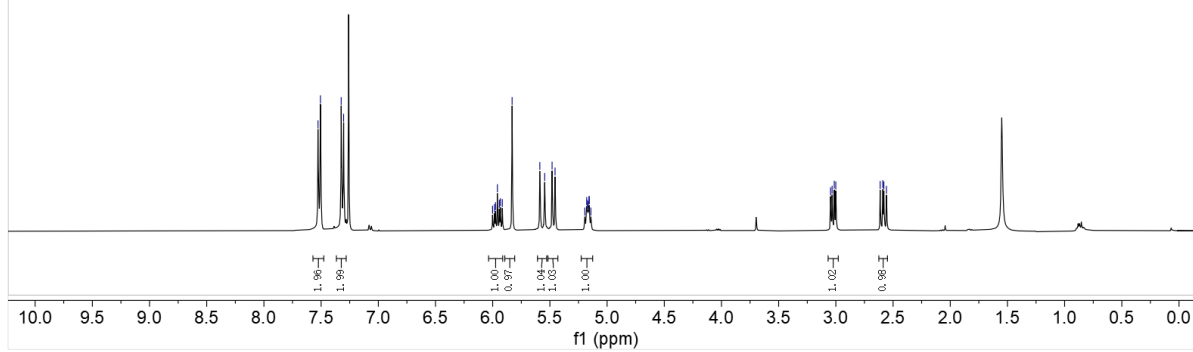

$\begin{array}{r} 3.045 \\ 3.032 \\ 3.013 \\ 3.000 \end{array}$ 
 $\begin{array}{r} 2.612 \\ 2.589 \\ 2.579 \\ 2.557 \end{array}$

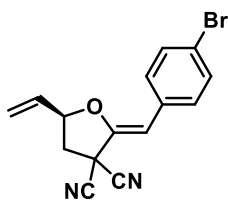

**6, 400 MHz, CDCl<sub>3</sub>**

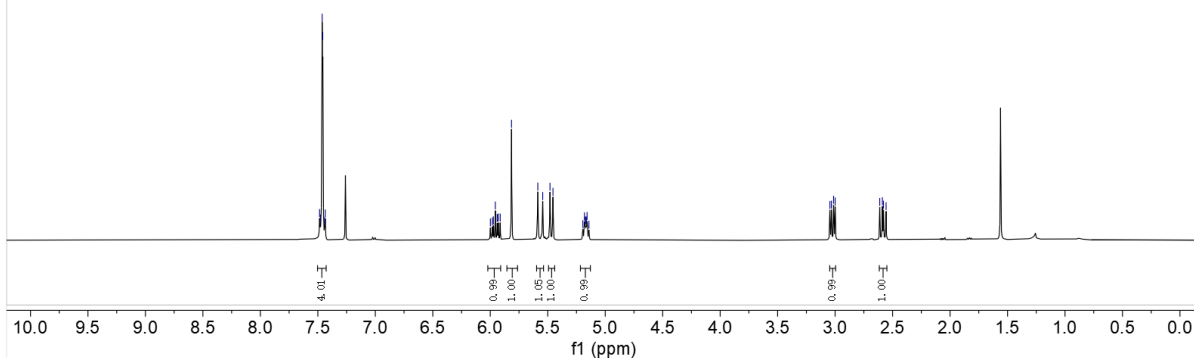

20241025  
xgr-5-84-4

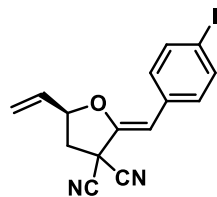

7, 400 MHz, CDCl<sub>3</sub>

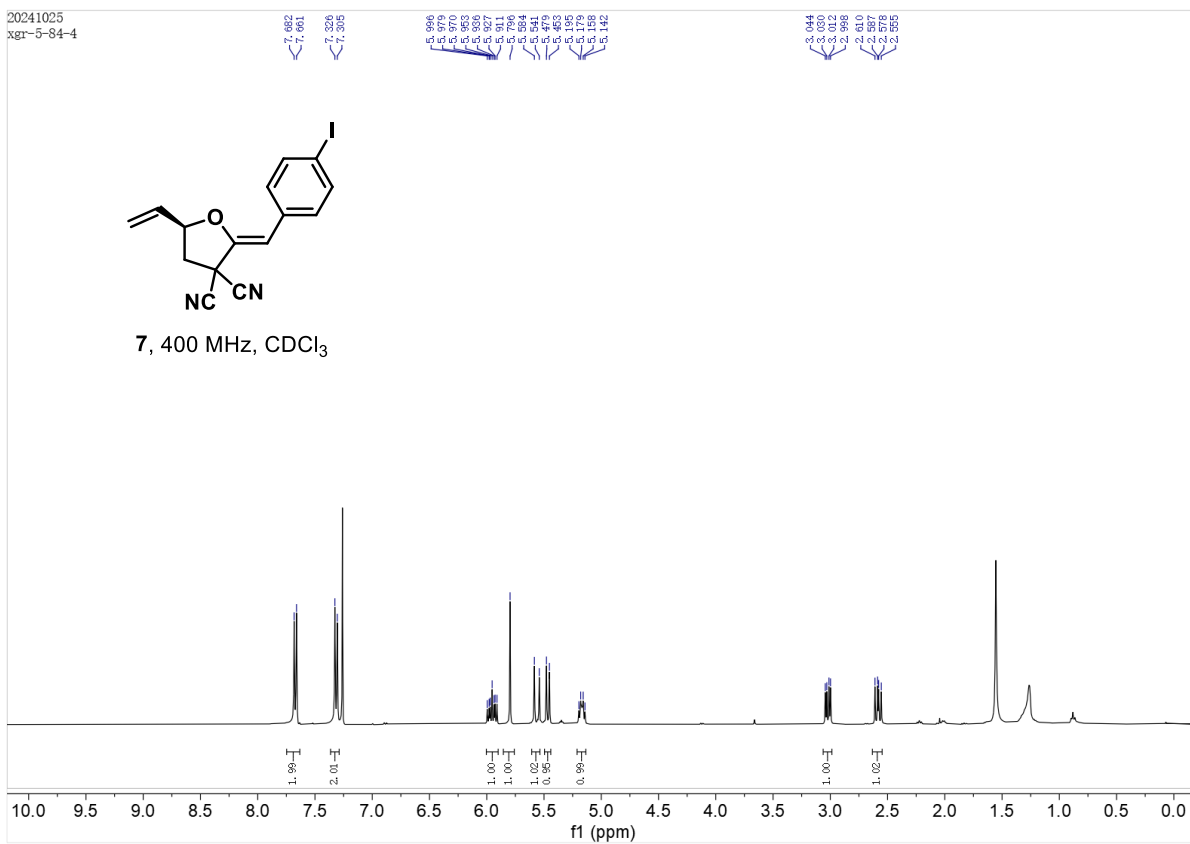

20241114-2  
XGR-5-93-2

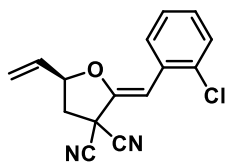

8, 400 MHz, CDCl<sub>3</sub>

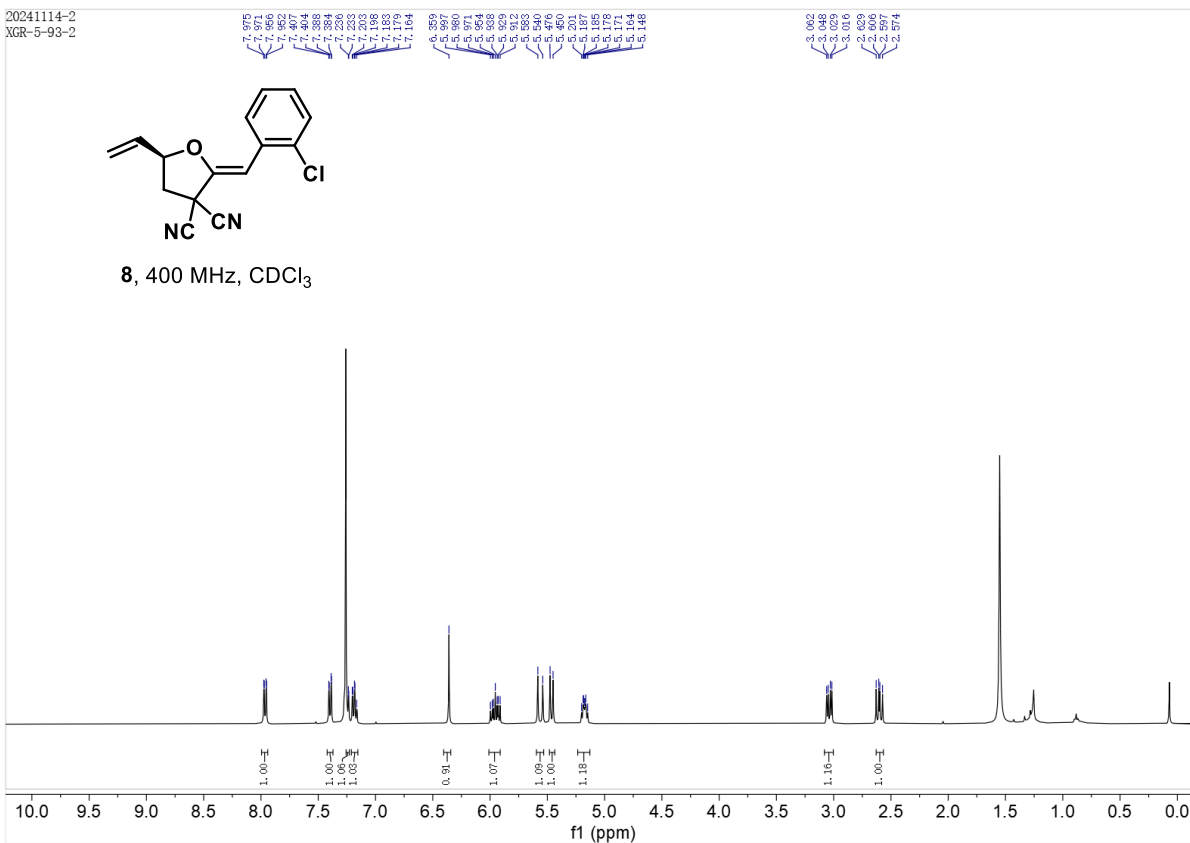



20241025  
xgr-5-84-6

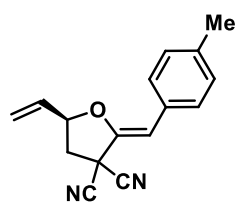

11, 400 MHz, CDCl<sub>3</sub>

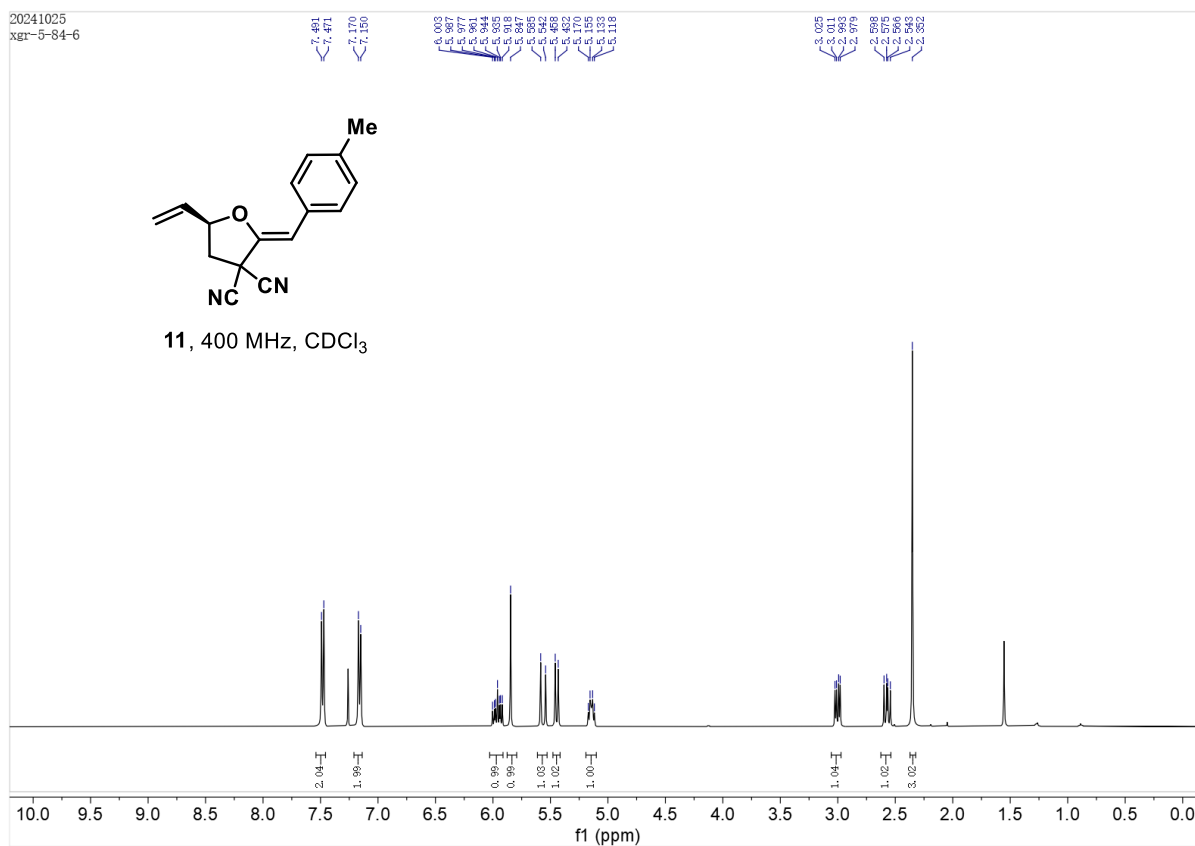

20240412-zcg  
LY-04-121-3

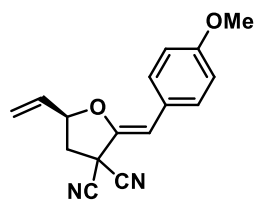

12, 400 MHz, CDCl<sub>3</sub>

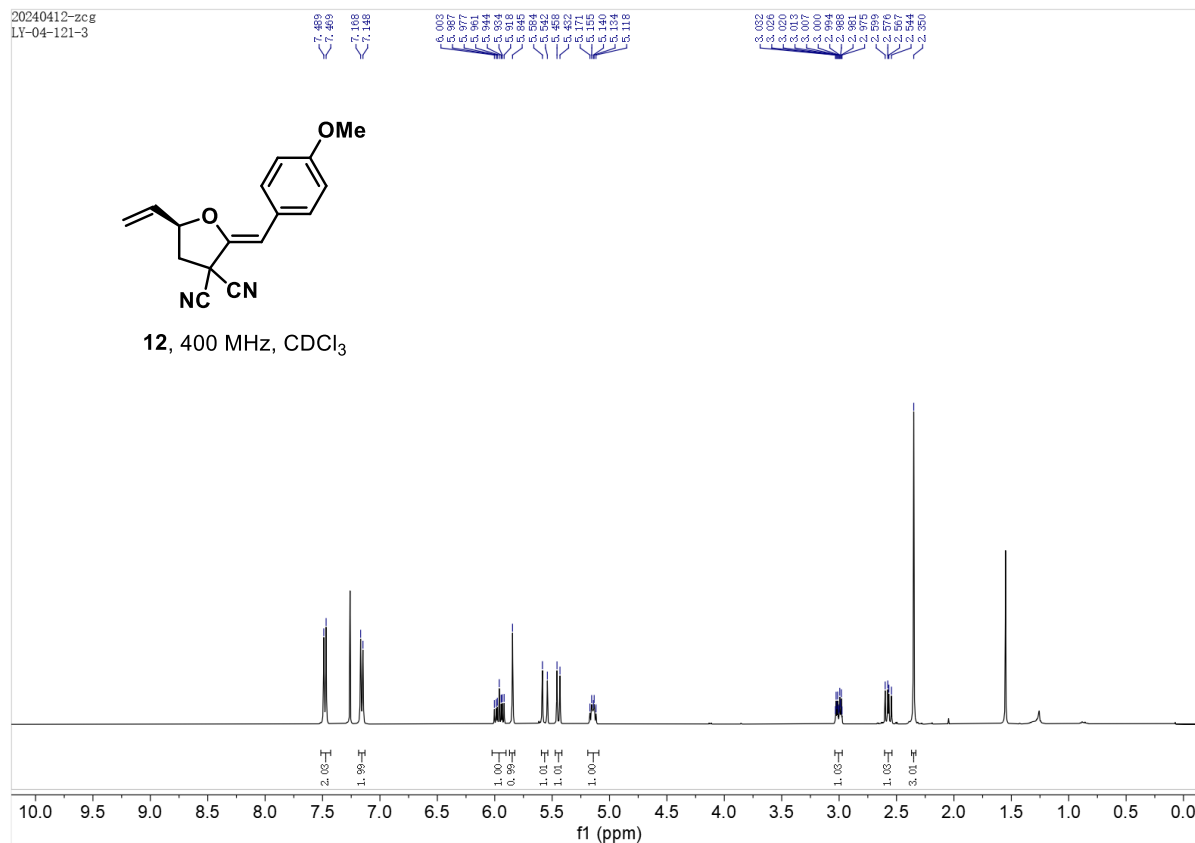

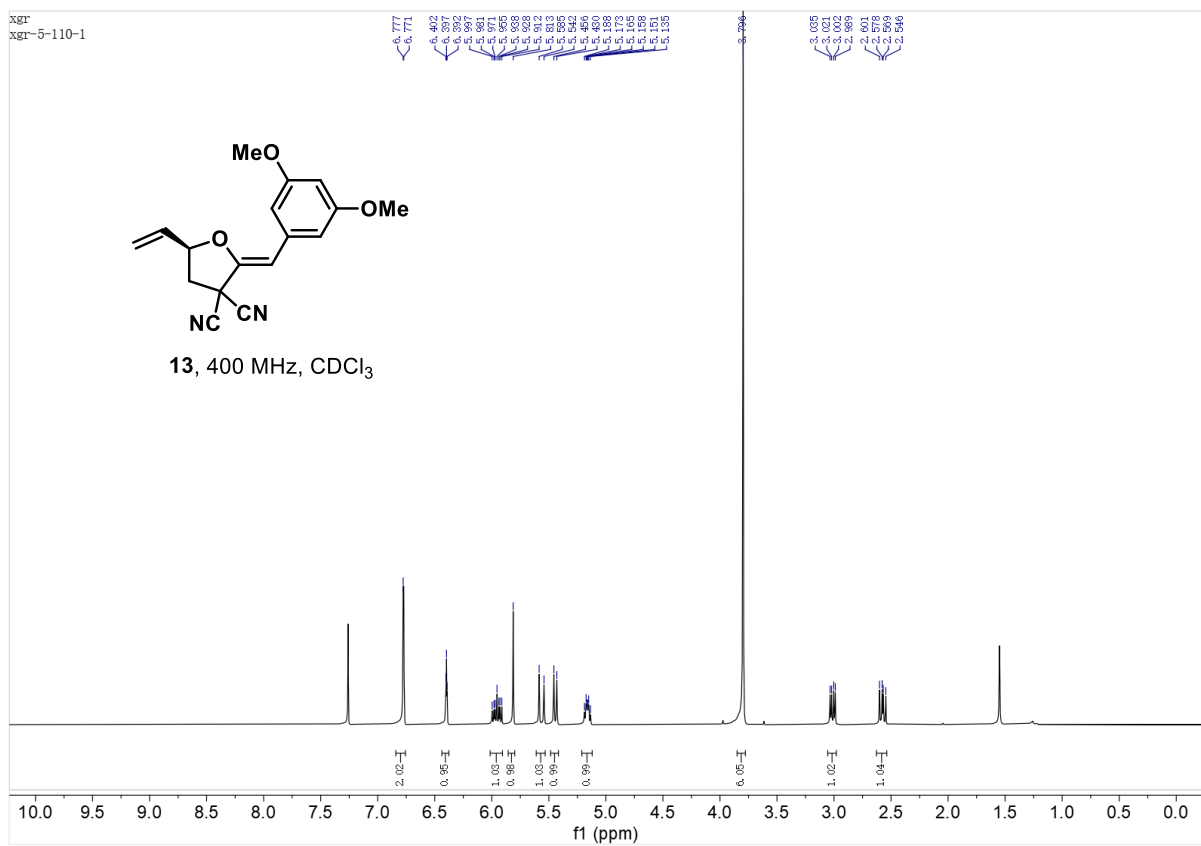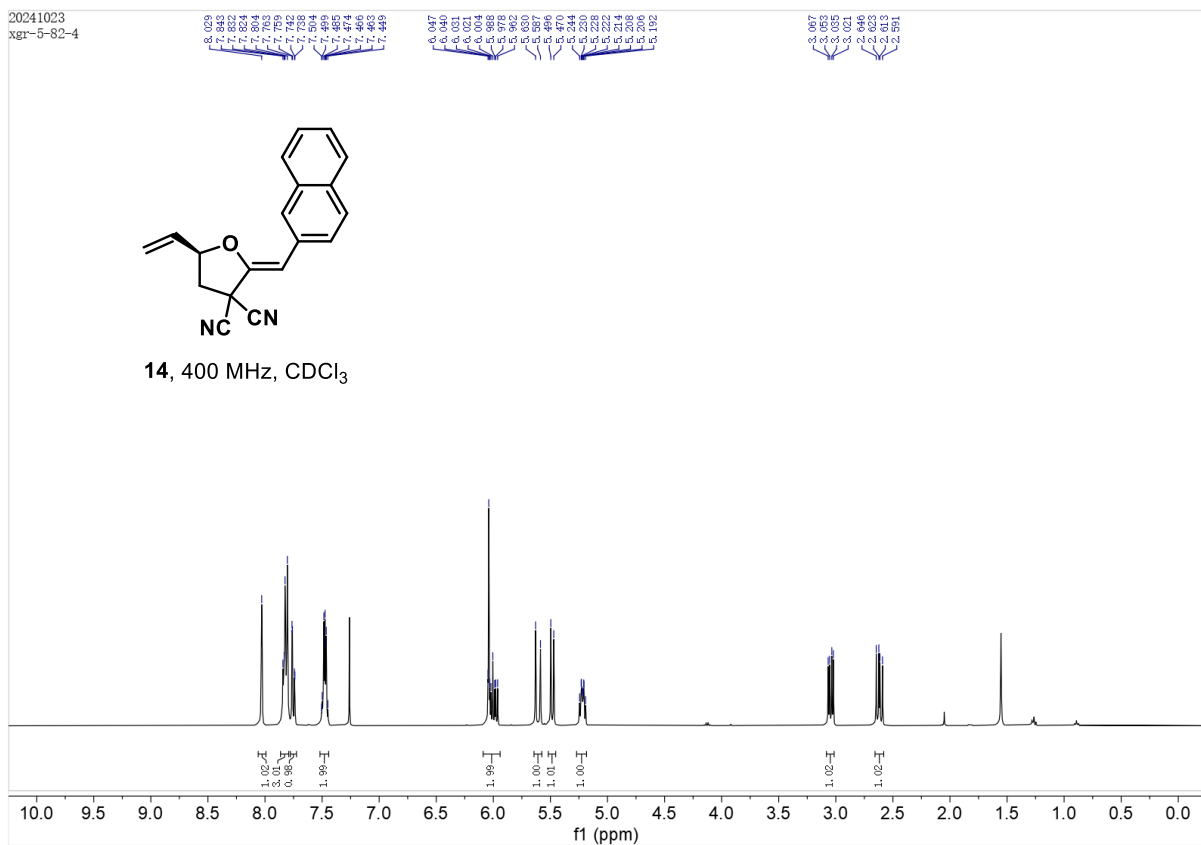

20240318  
BZF-01-102-2

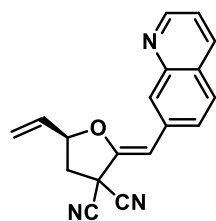

**15**, 400 MHz, CDCl<sub>3</sub>

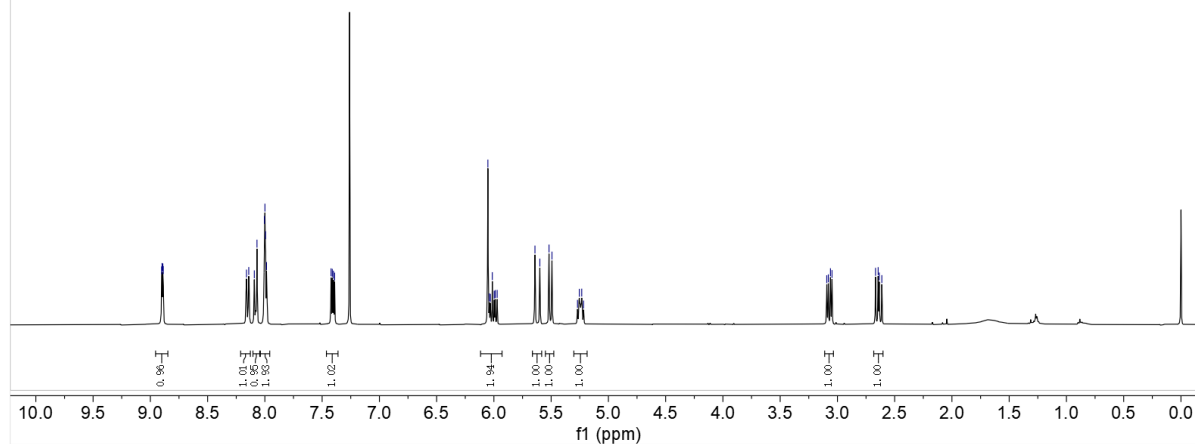

XGR  
XGR-5-100-2

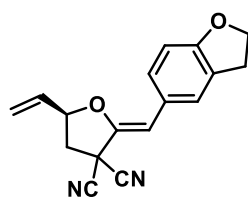

**16**, 400 MHz, CDCl<sub>3</sub>

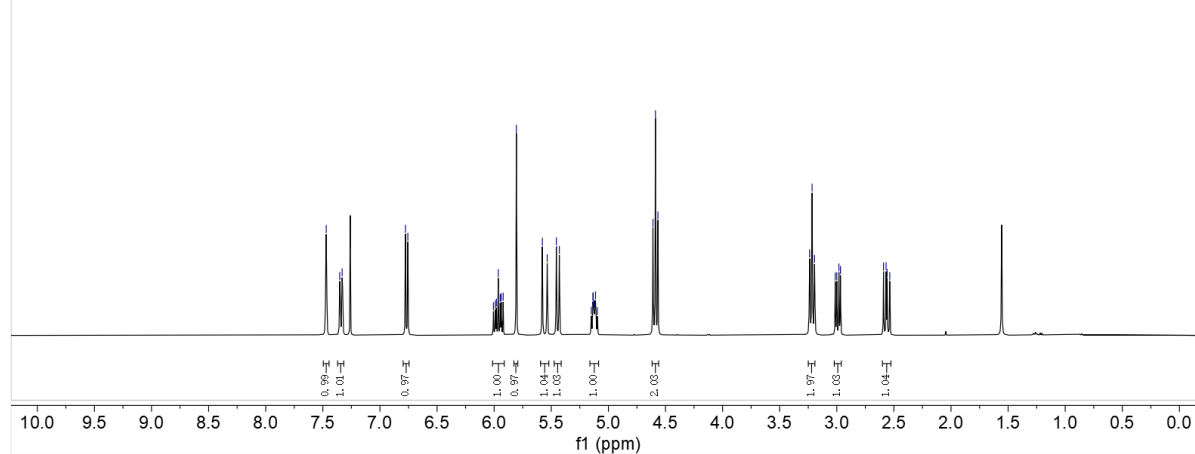

20240904  
bzf-27-1

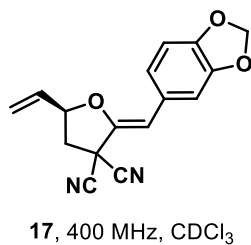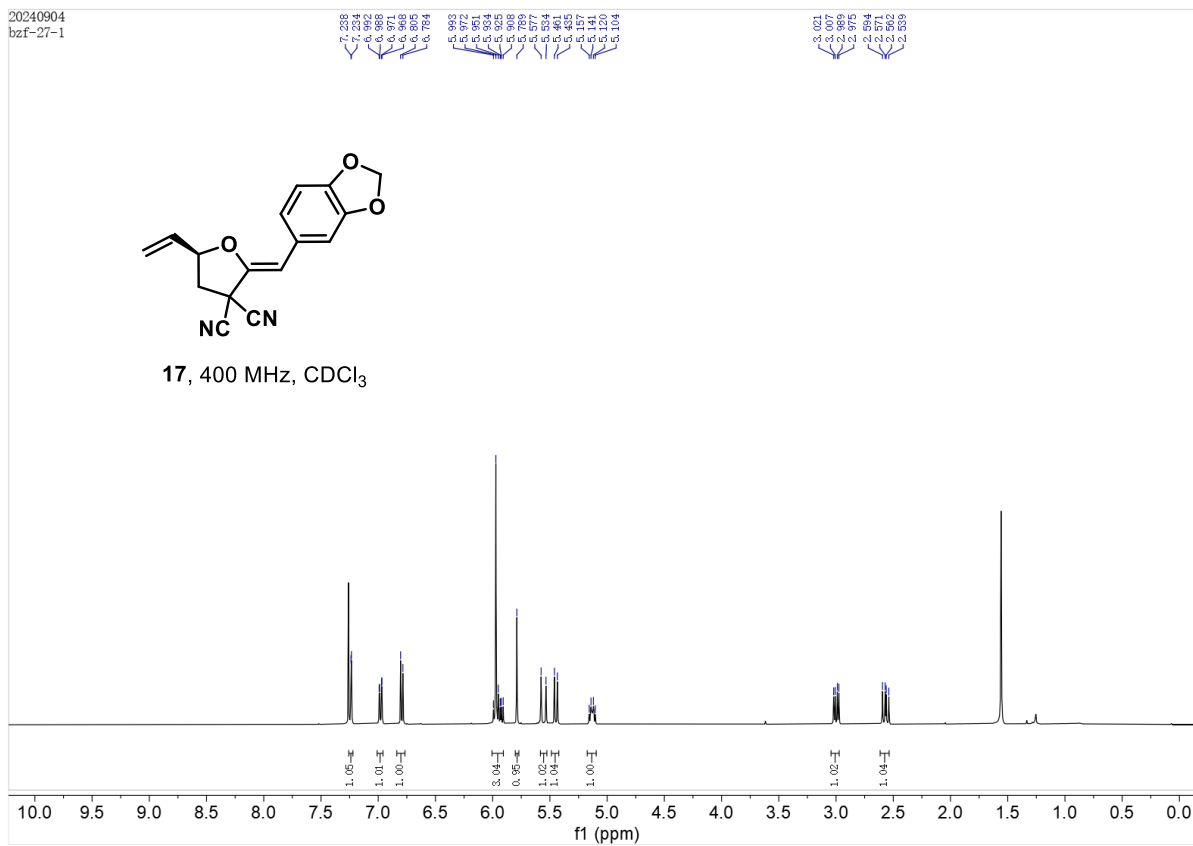

20241118  
XGR-5-101-1

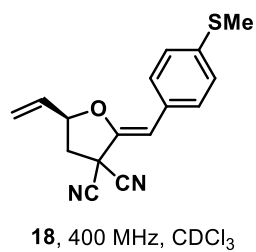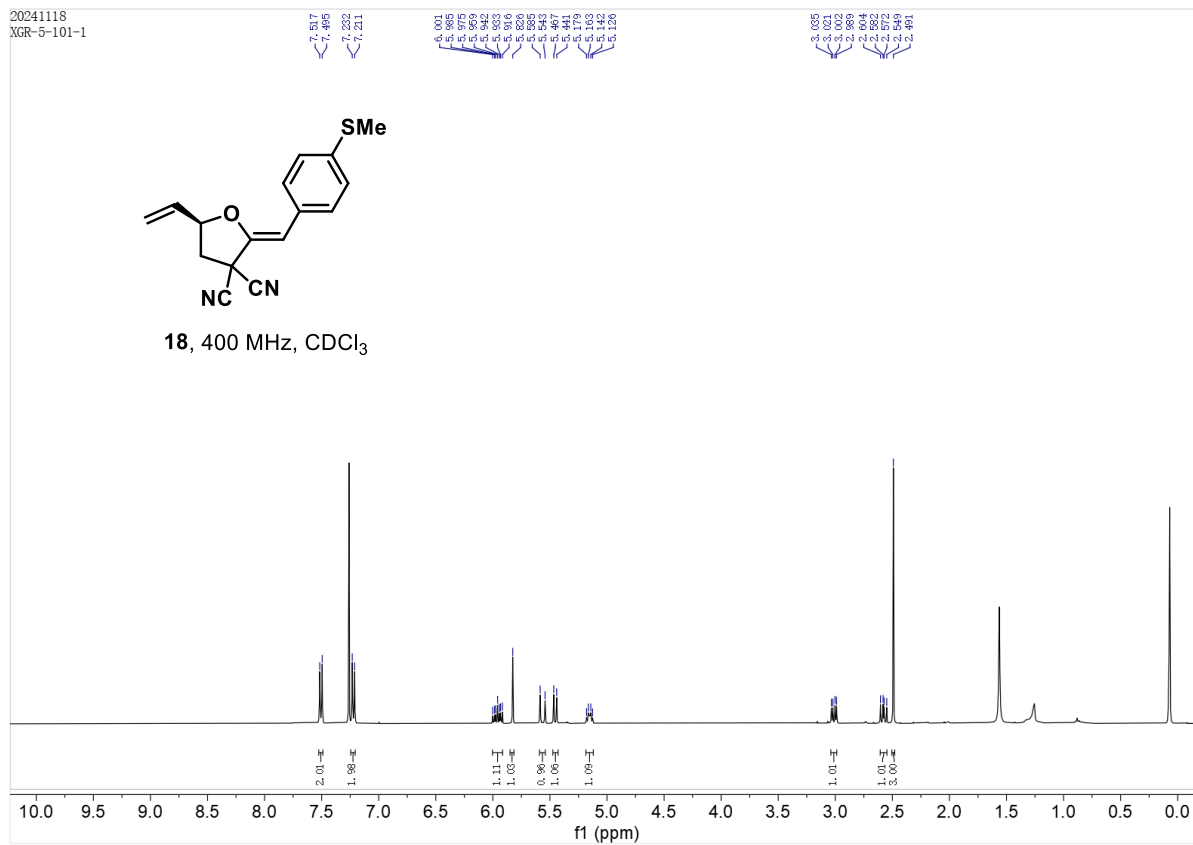



20241023  
XGR-5-82-6

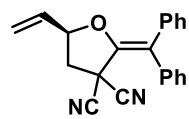

21, 400 MHz, CDCl<sub>3</sub>

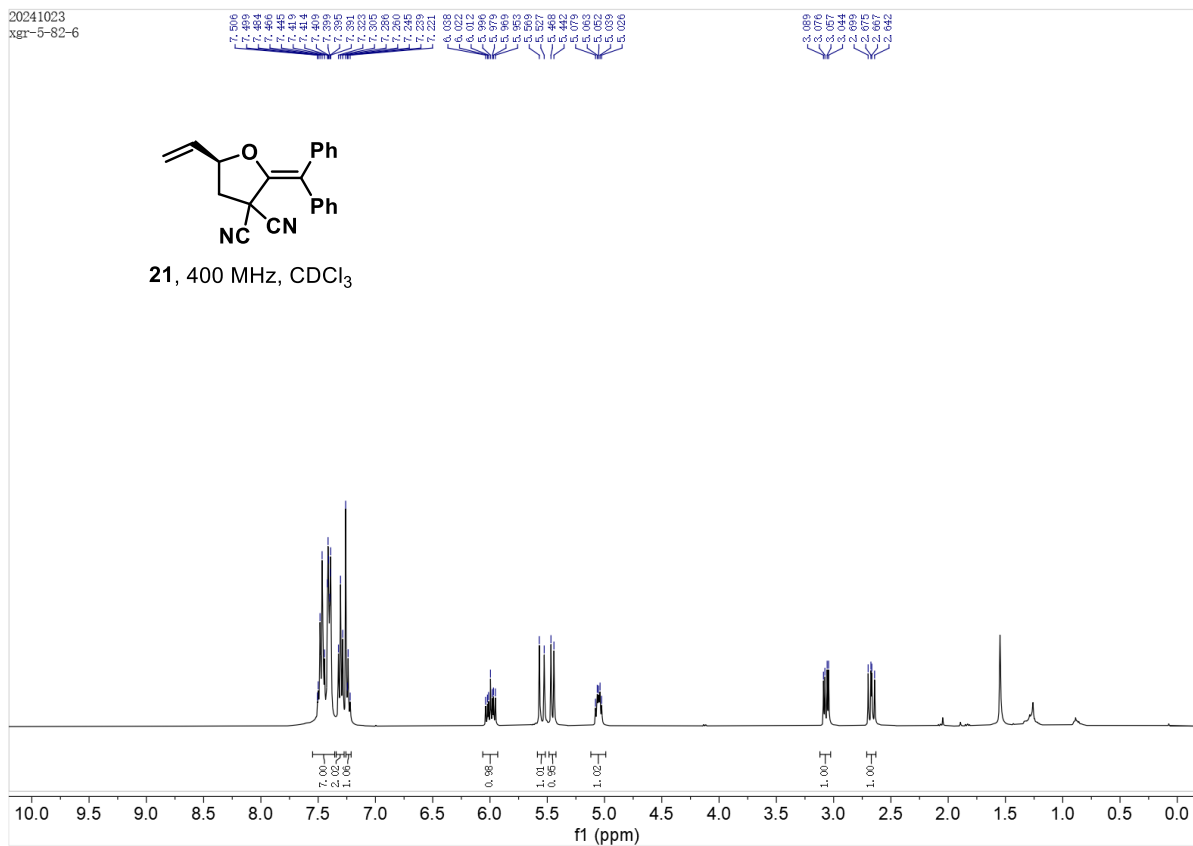

XGR  
XGR-5-101-4 H

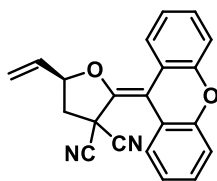

22, 400 MHz, CDCl<sub>3</sub>

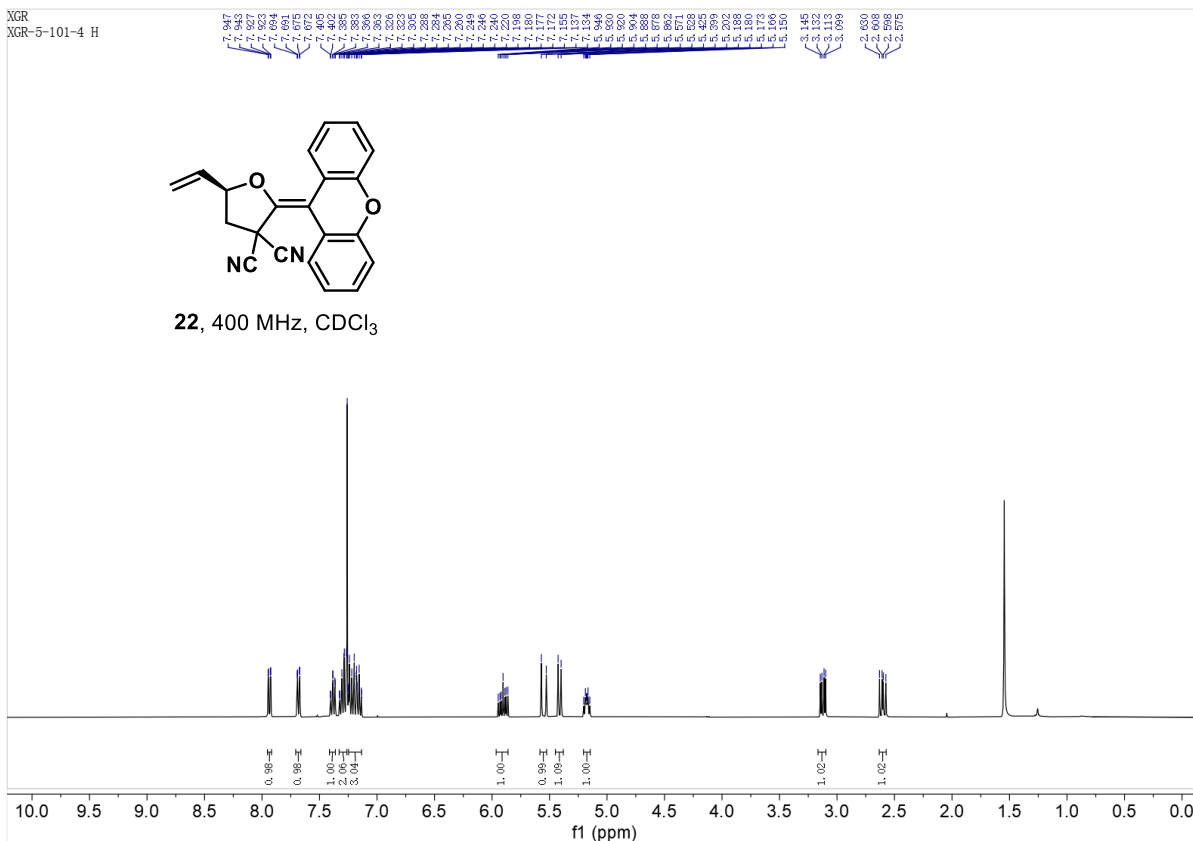





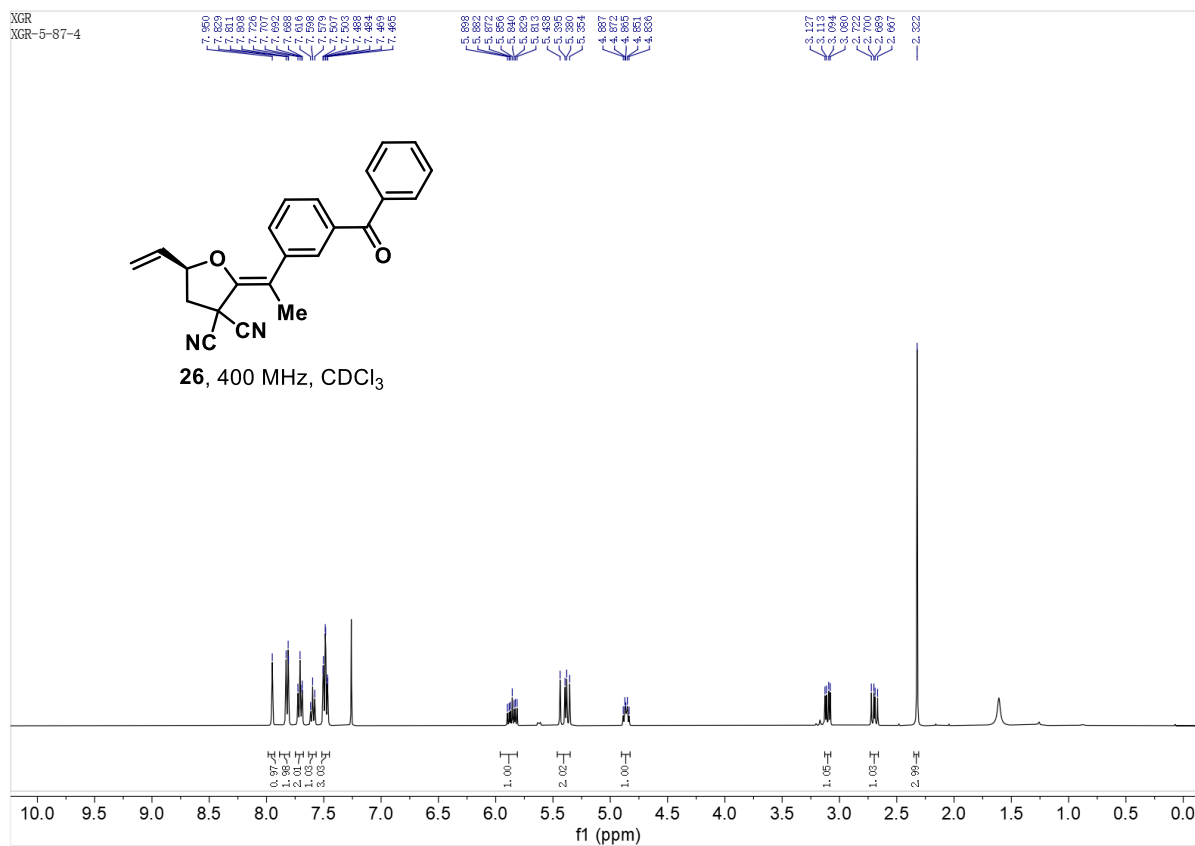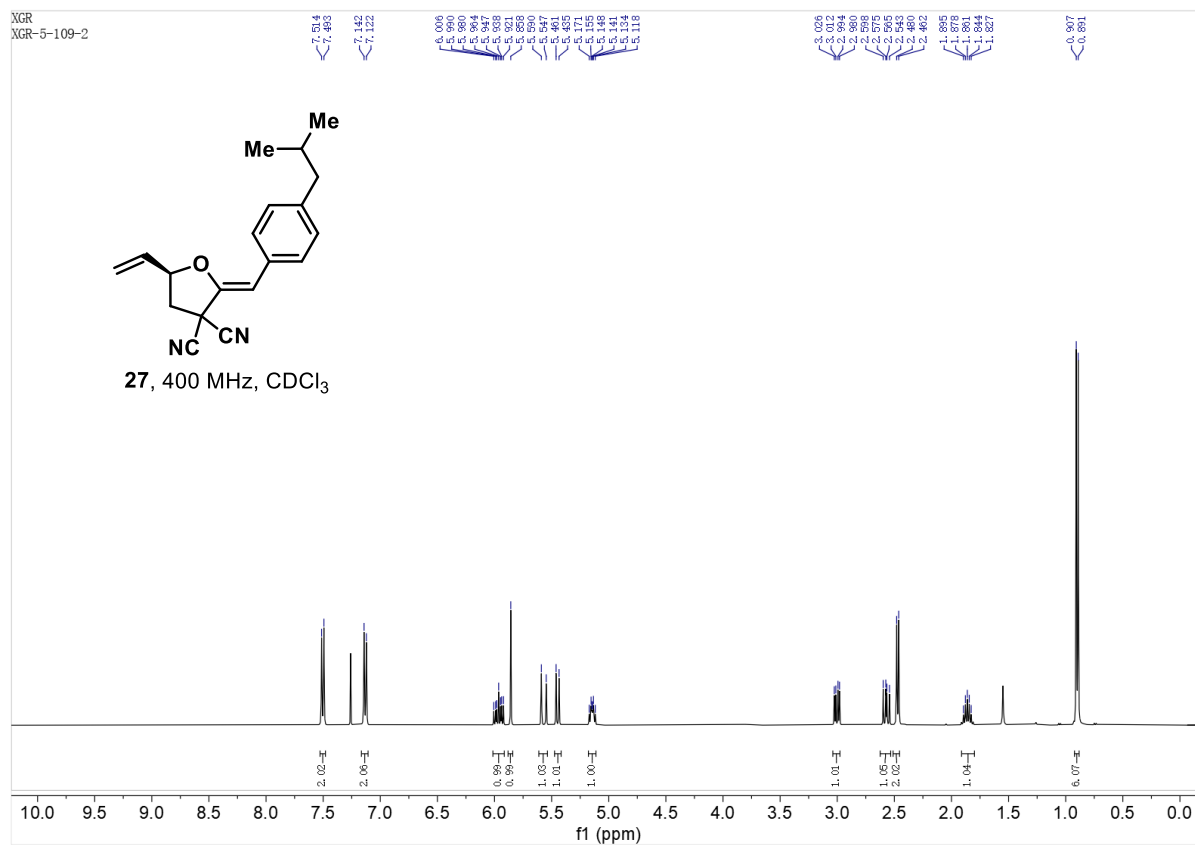

20241125-new  
xgr-5-110-6

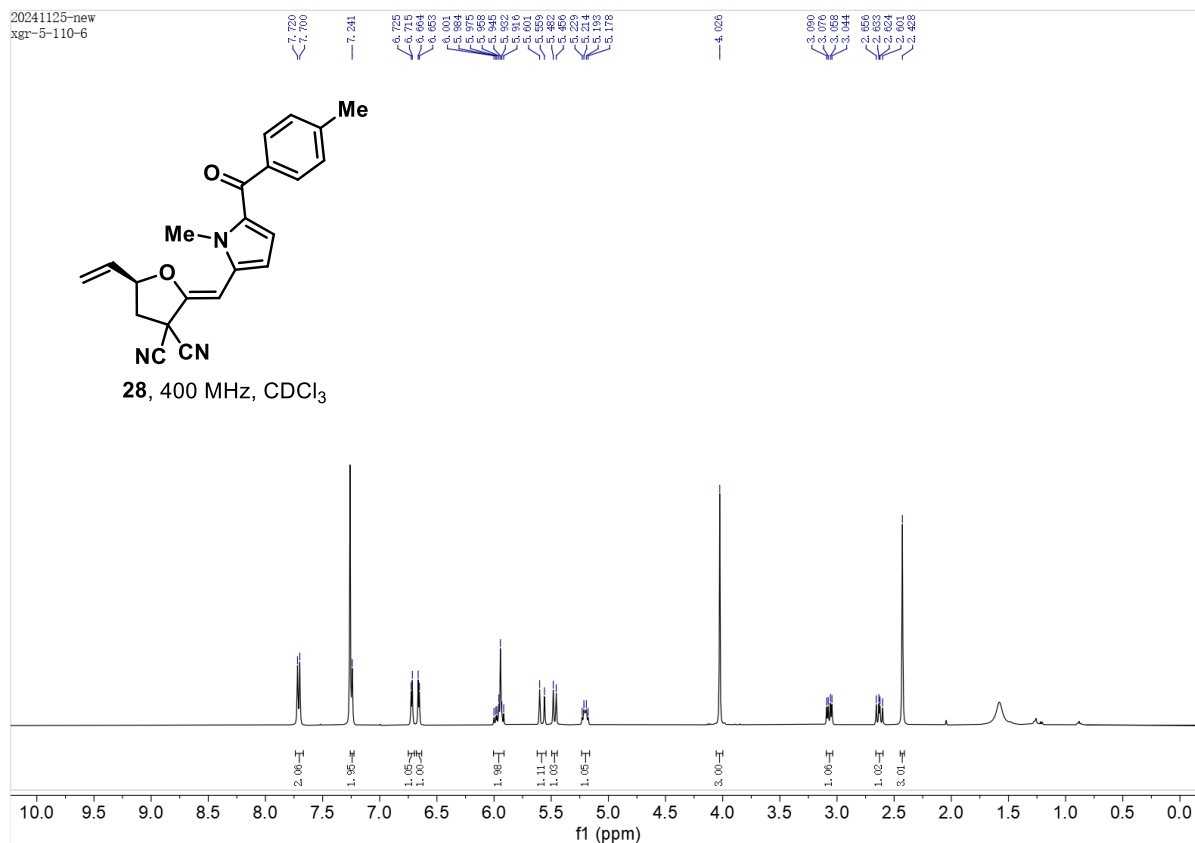

XGR  
XGR-5-93-3

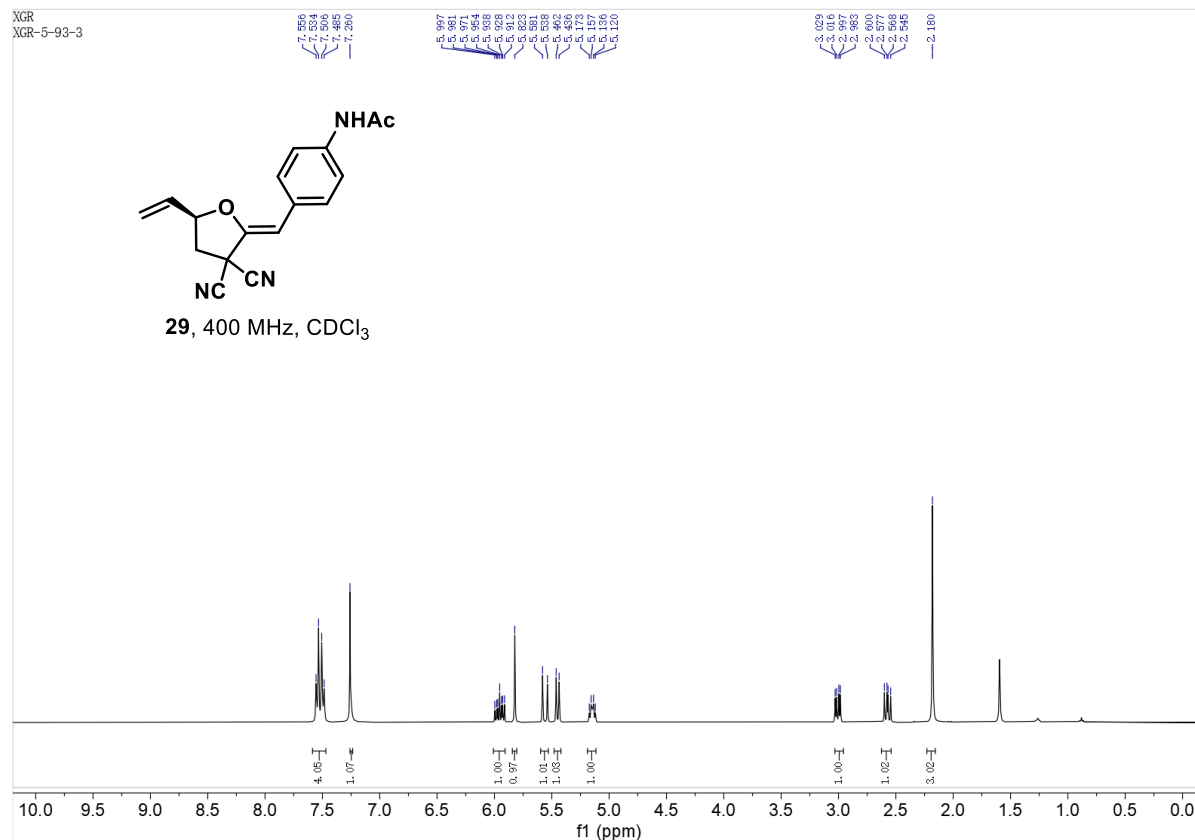

20241023  
xgr-5-82-8

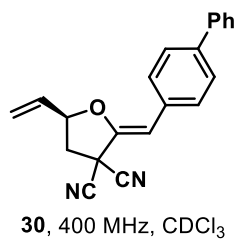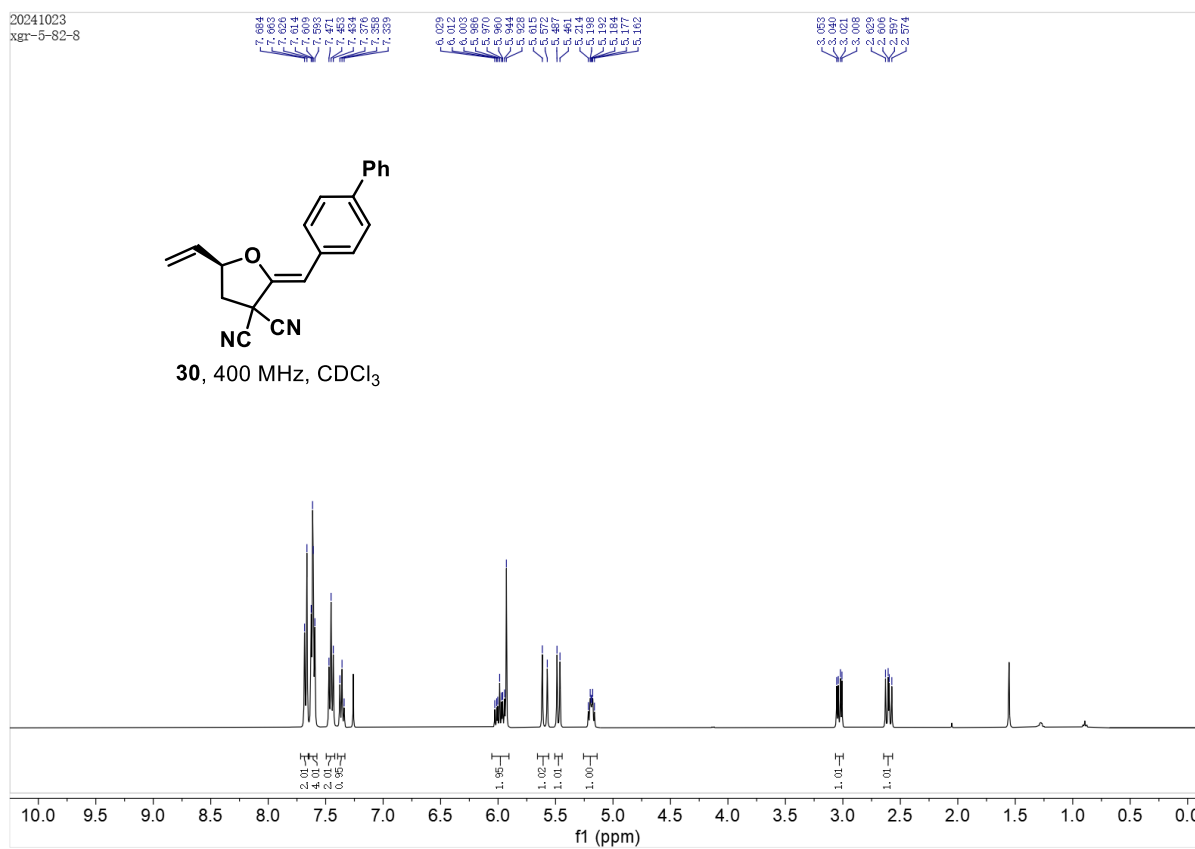

20241118  
XGR-5-100

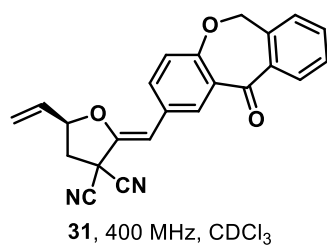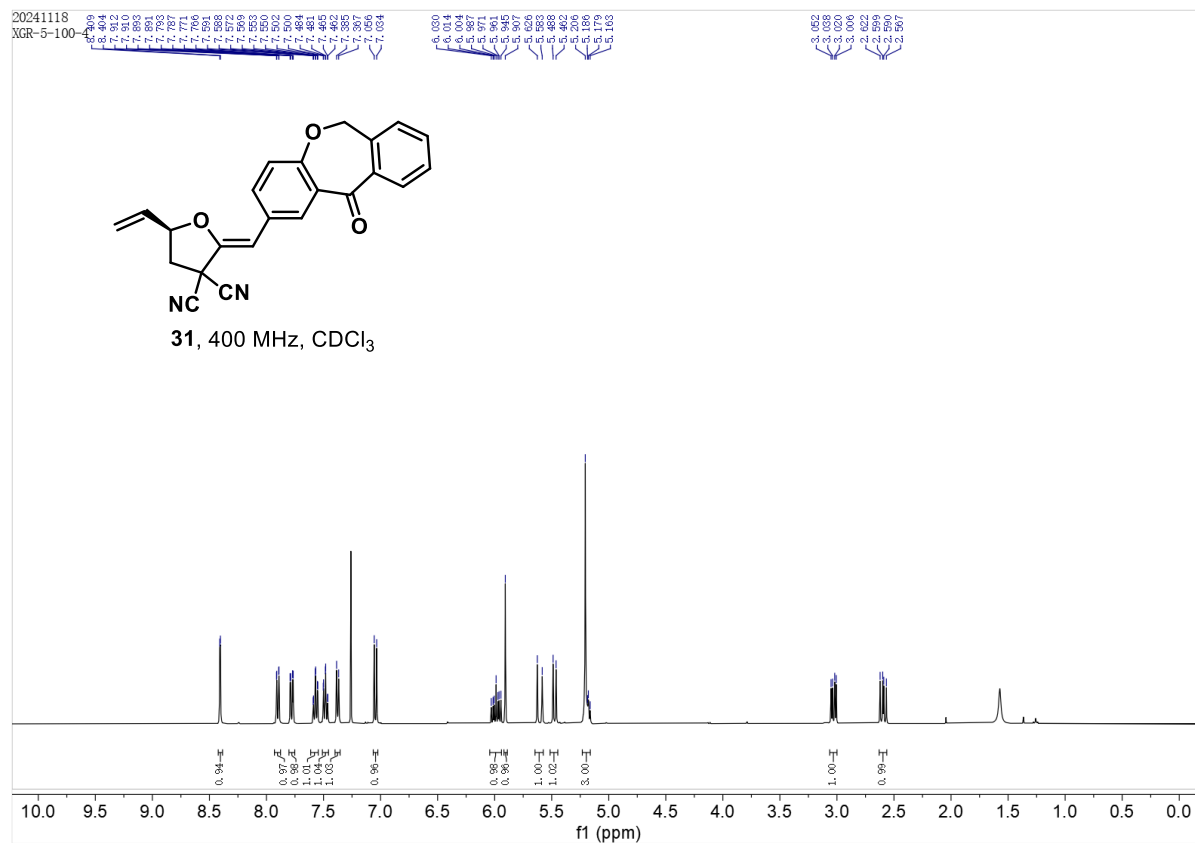

20241025  
xgr-5-84-2

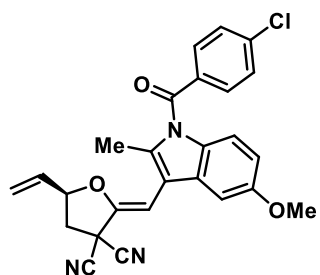

32, 400 MHz, CDCl<sub>3</sub>

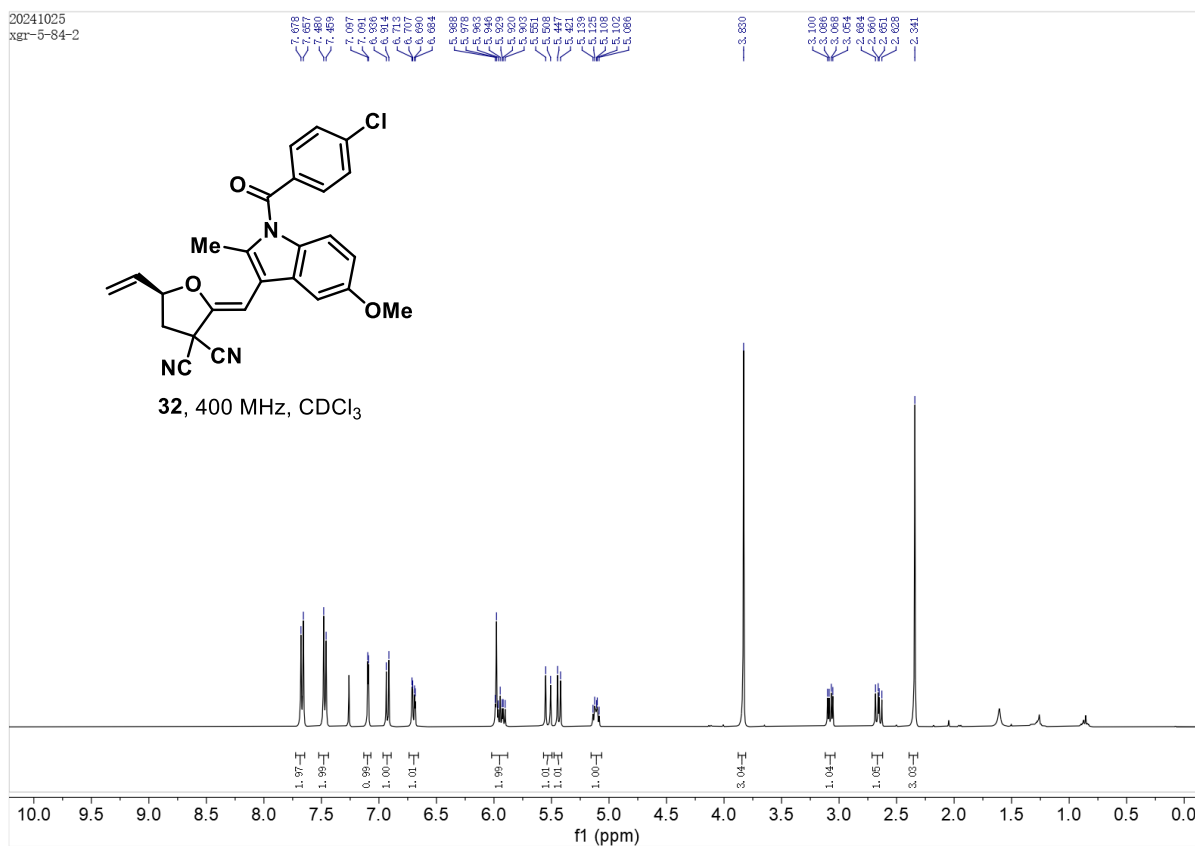

20241128  
xgr-5-112-4

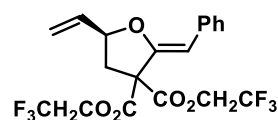

33, 400 MHz, CDCl<sub>3</sub>

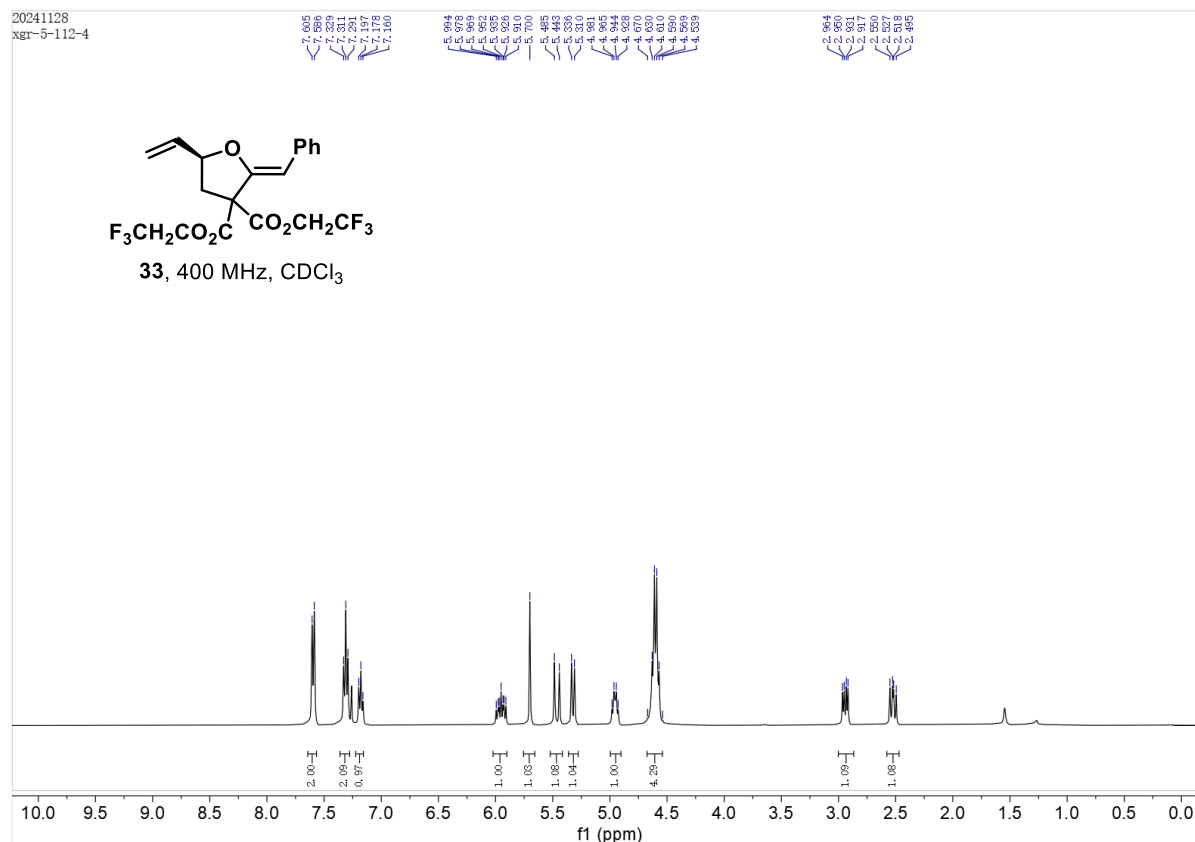

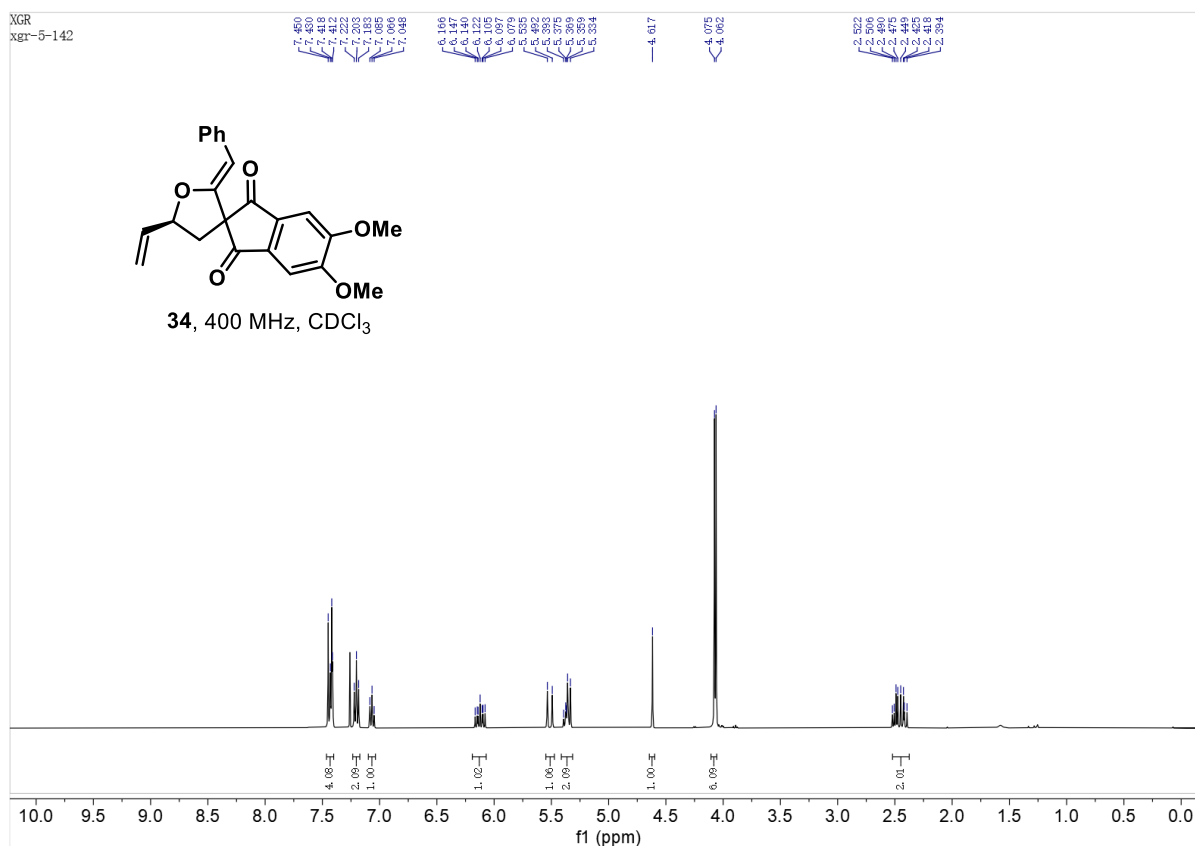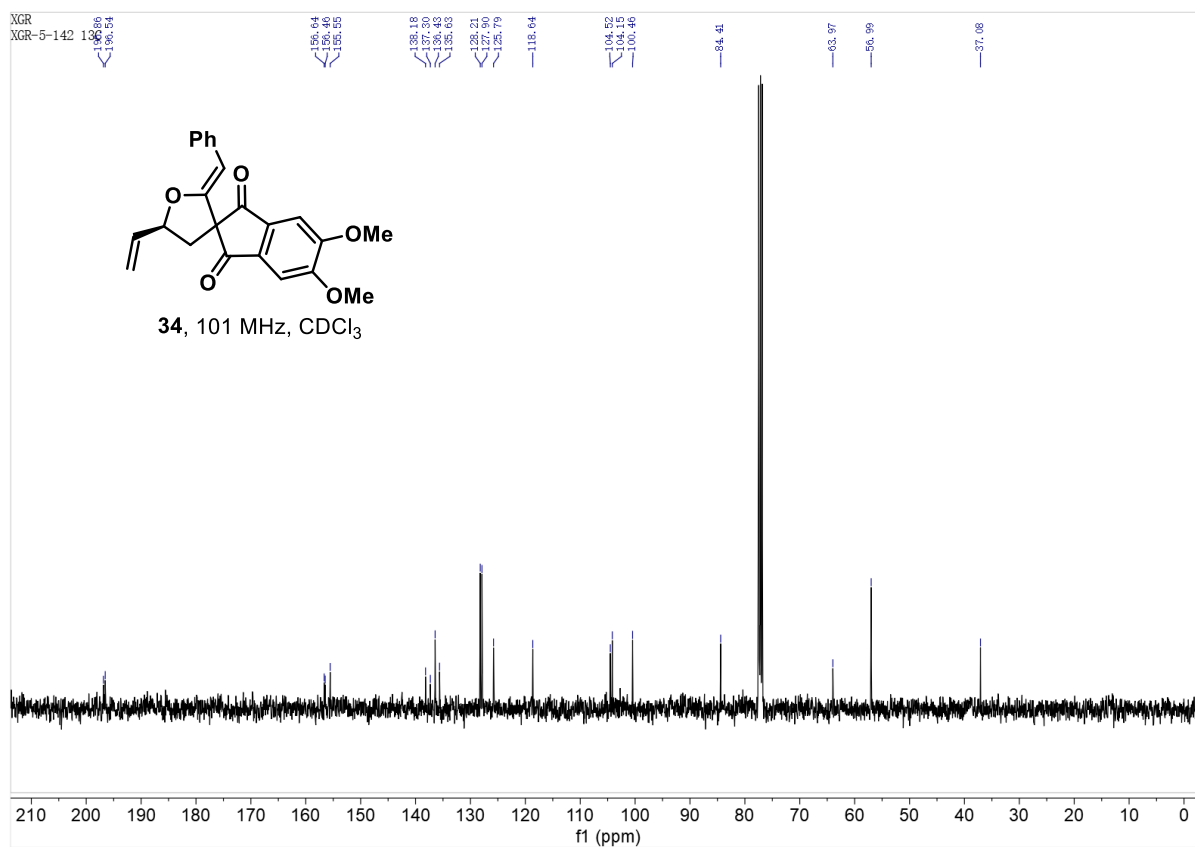



**37**, 2:1 dr, 400 MHz, CDCl<sub>3</sub>

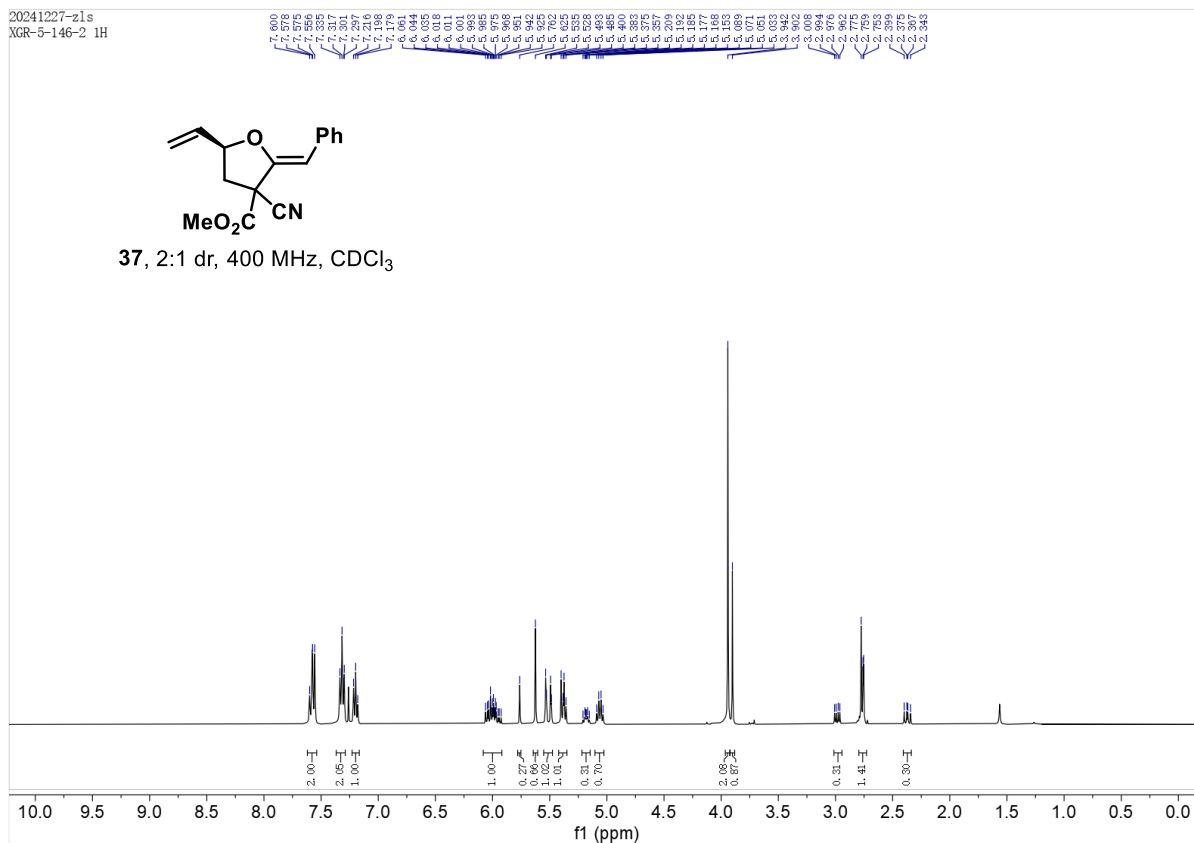

**38**, 400 MHz, CDCl<sub>3</sub>

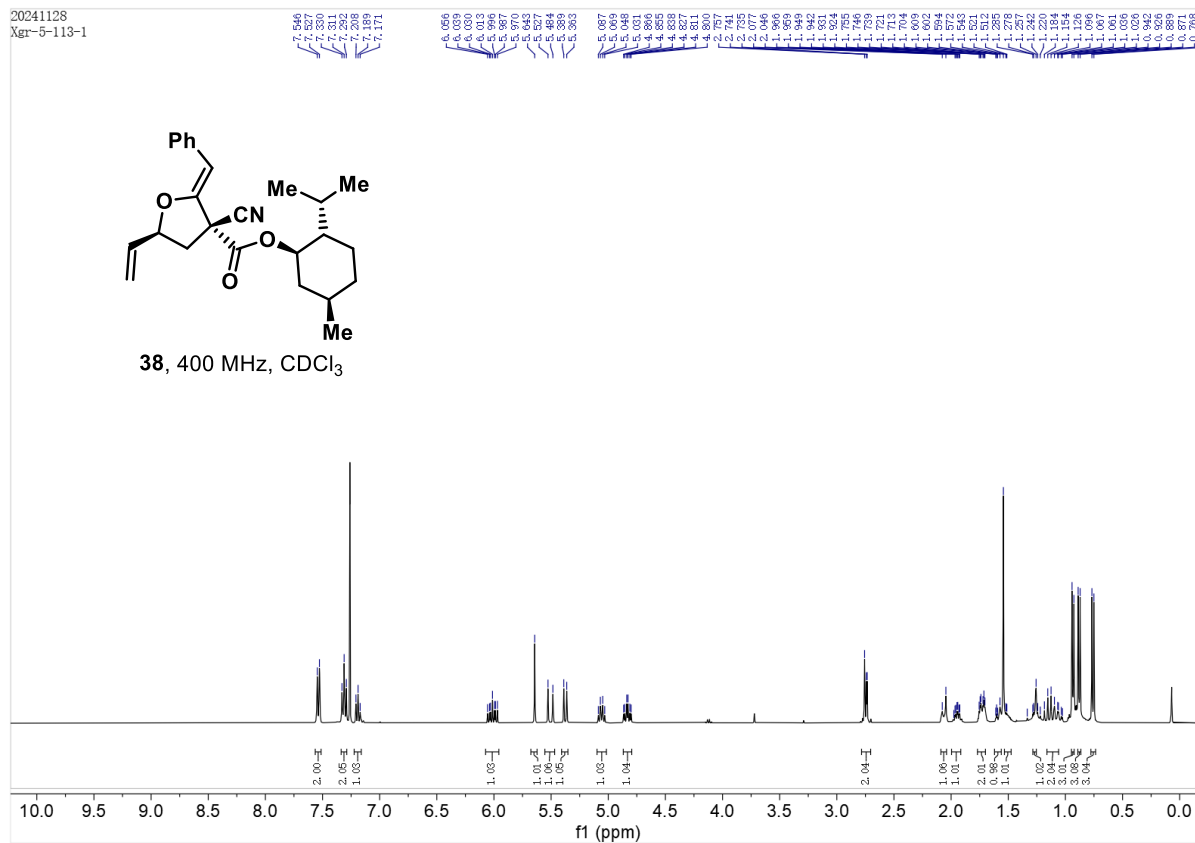

20241213  
LY-05-197-2

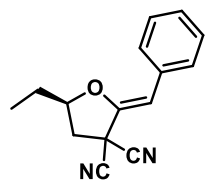

39, 400 MHz, CDCl<sub>3</sub>

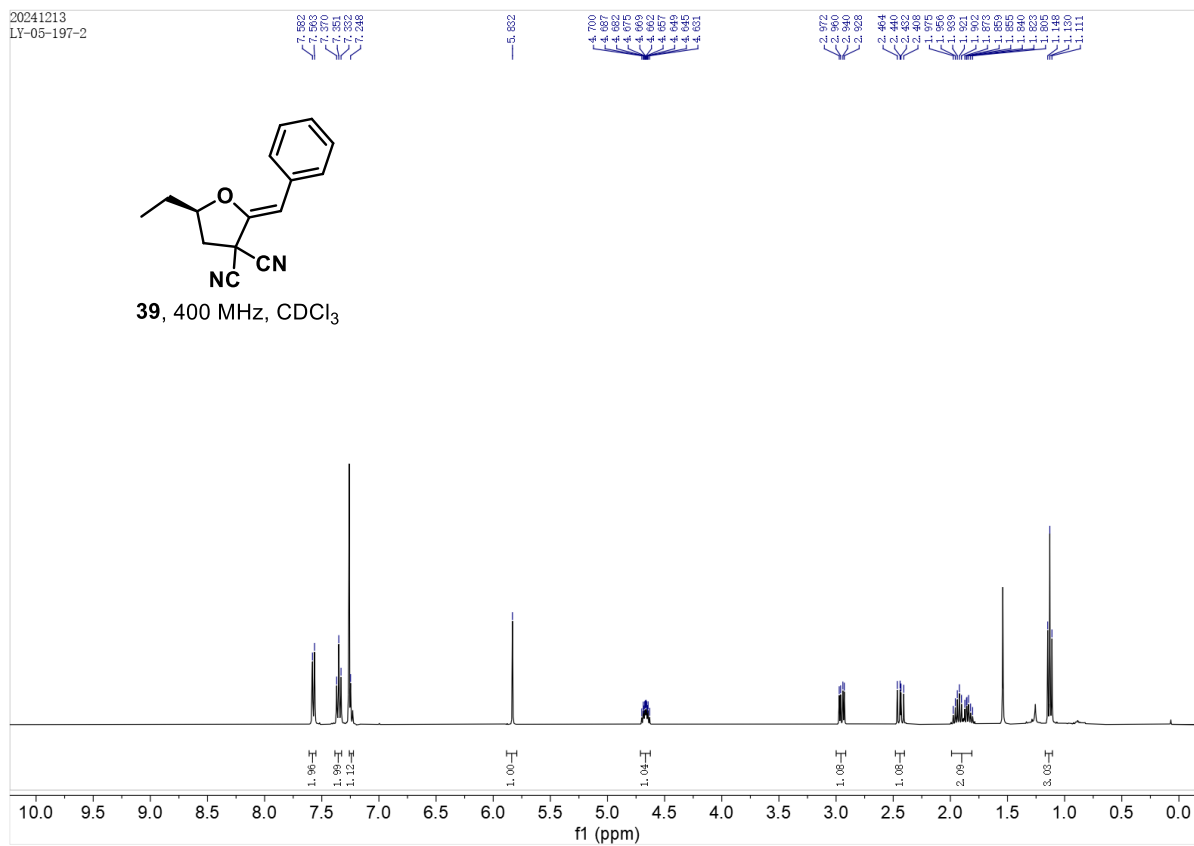

20241213  
LY-05-197-2

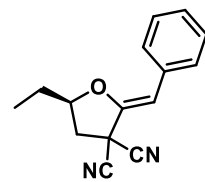

39, 101 MHz, CDCl<sub>3</sub>

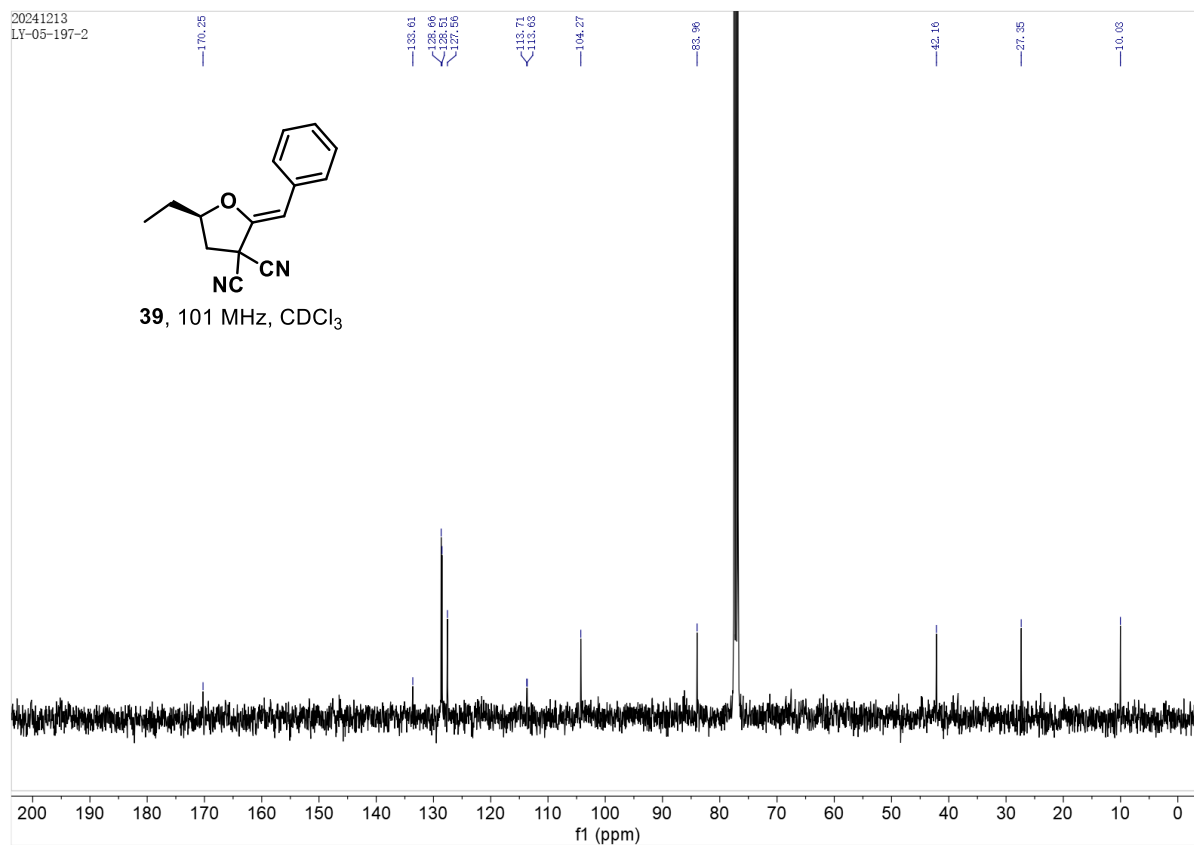

20241218  
LY-5-197-1

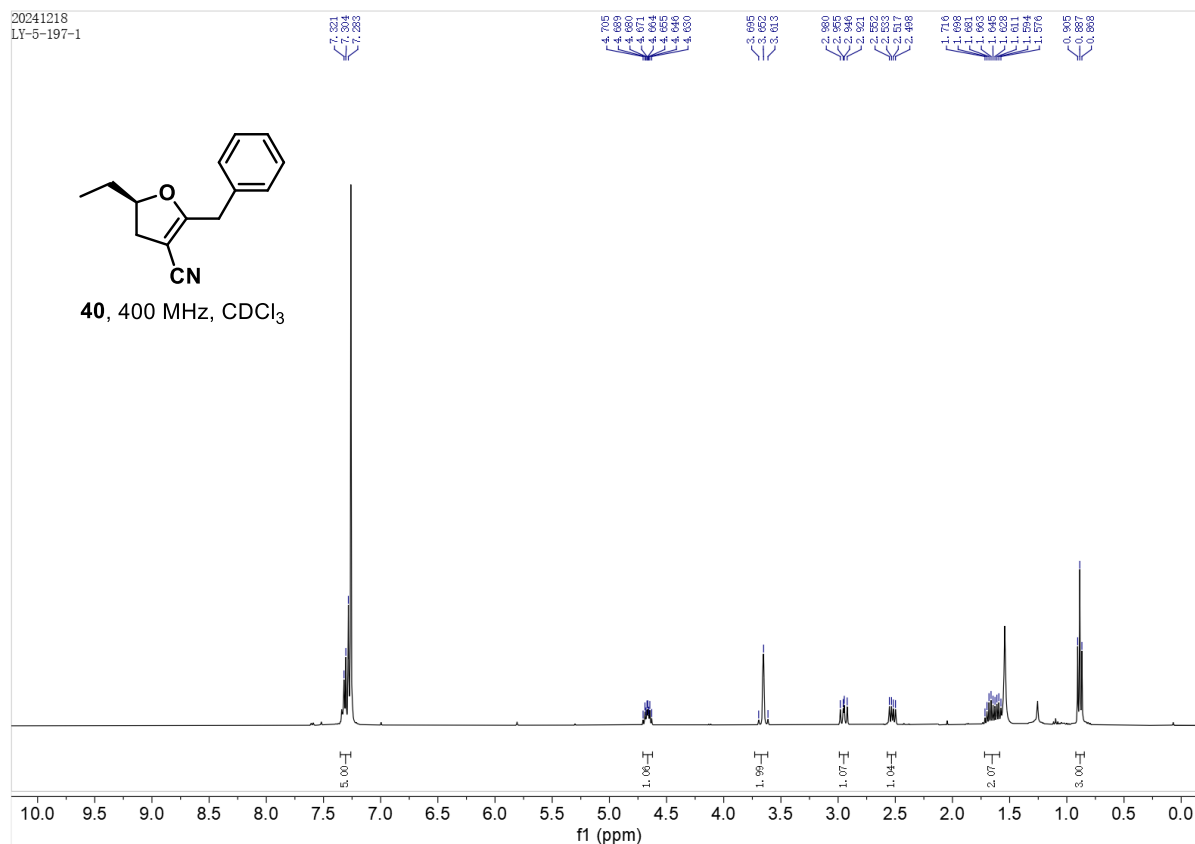

20241213  
LY-05-197-1

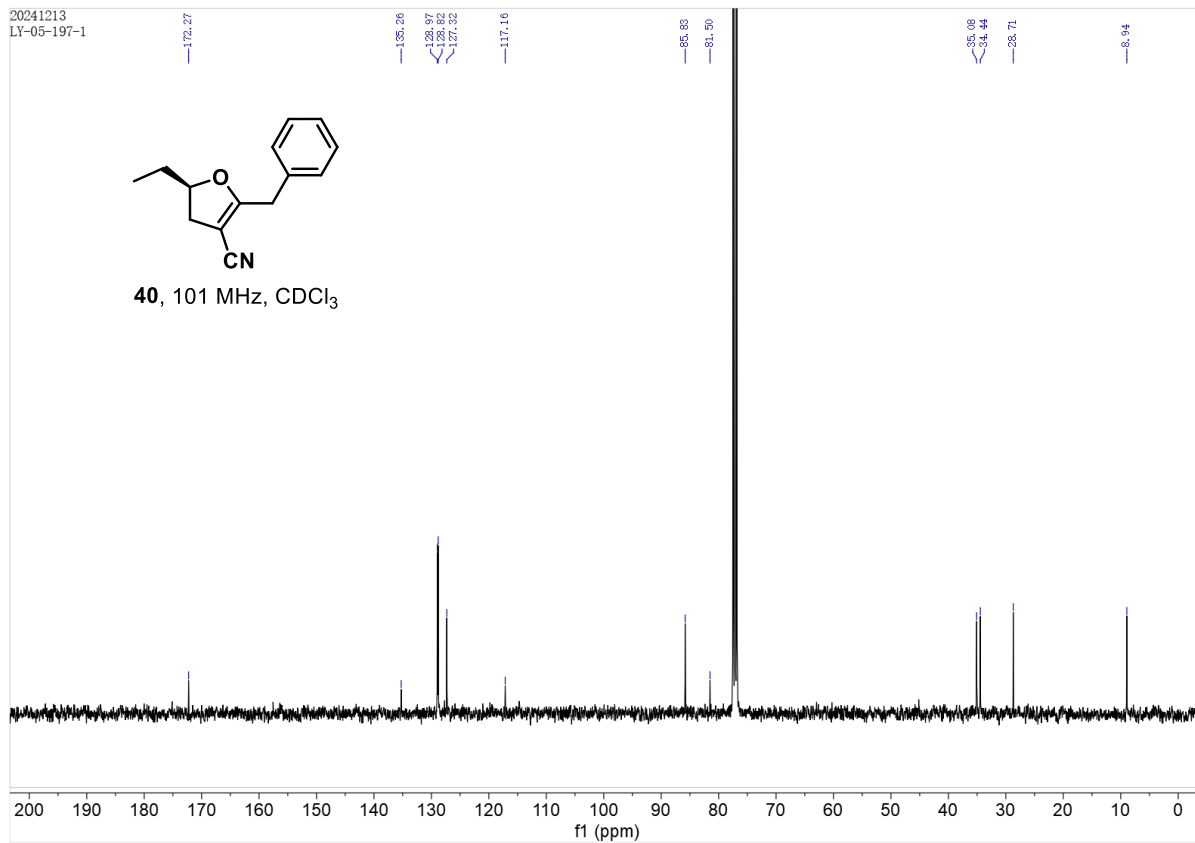

20241218  
LY-5-198

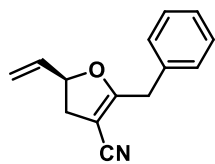

**41**, 400 MHz, CDCl<sub>3</sub>

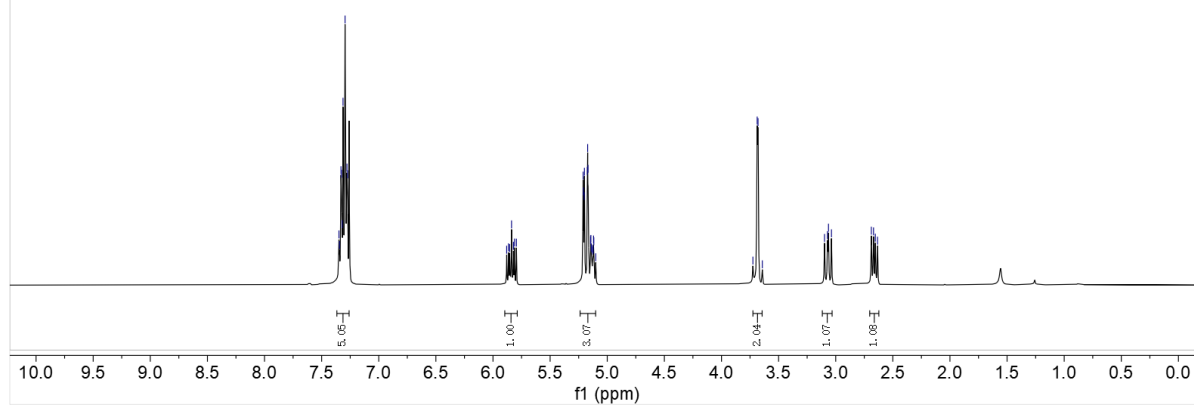

20241218  
LY-5-198 13C

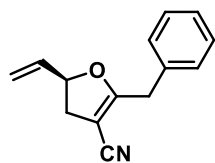

**41**, 101 MHz, CDCl<sub>3</sub>

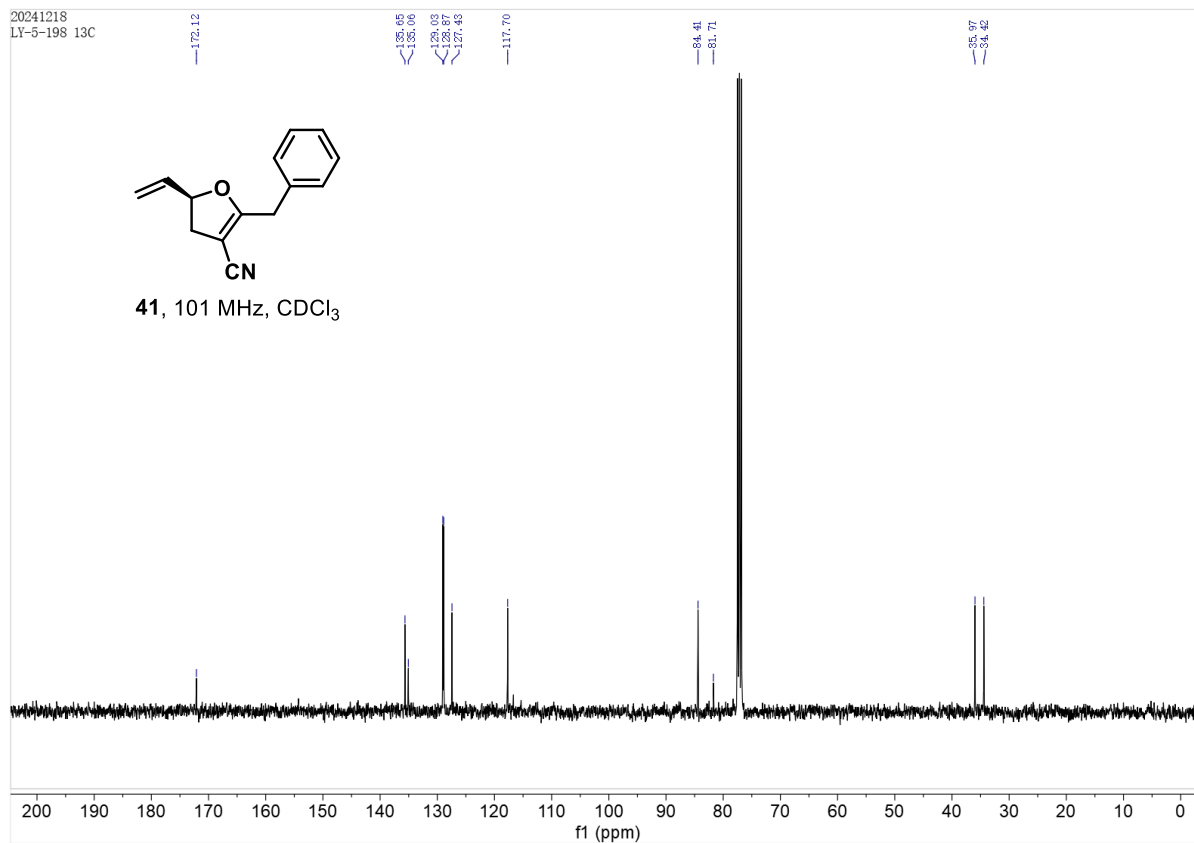

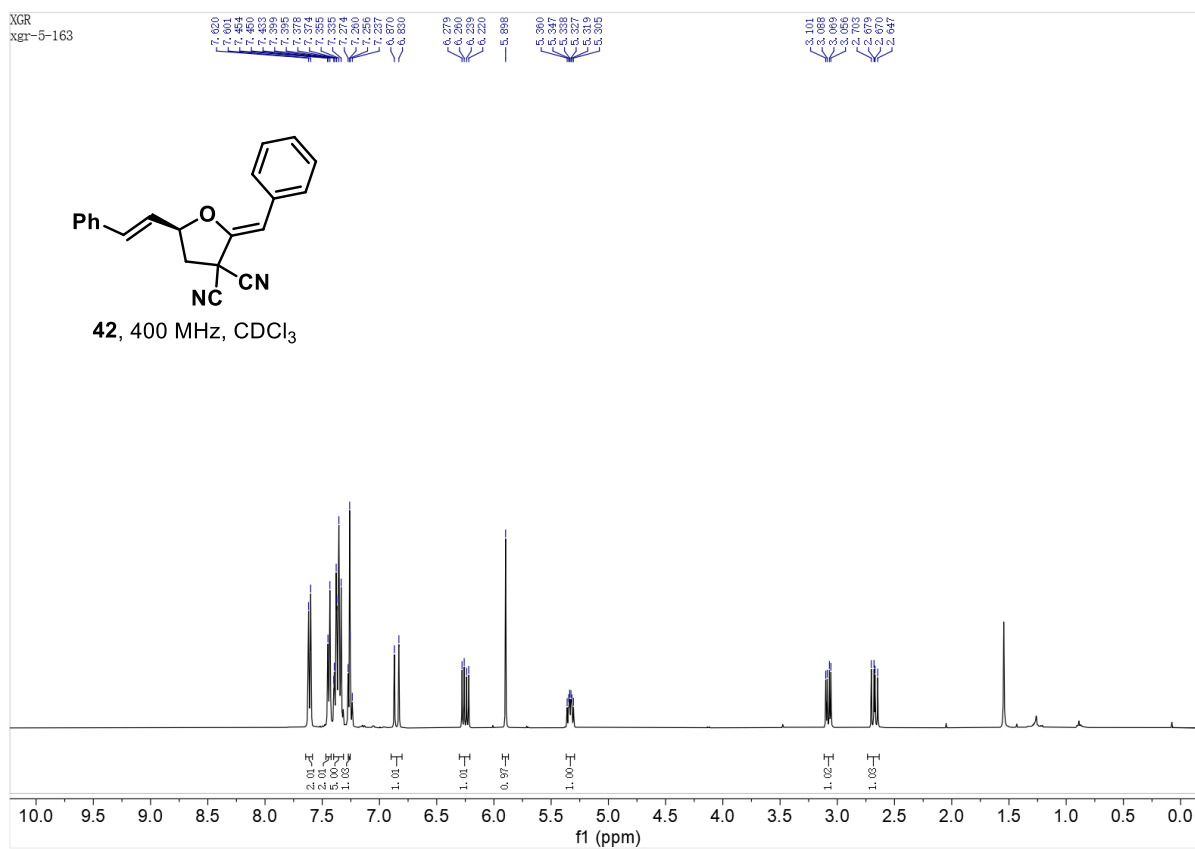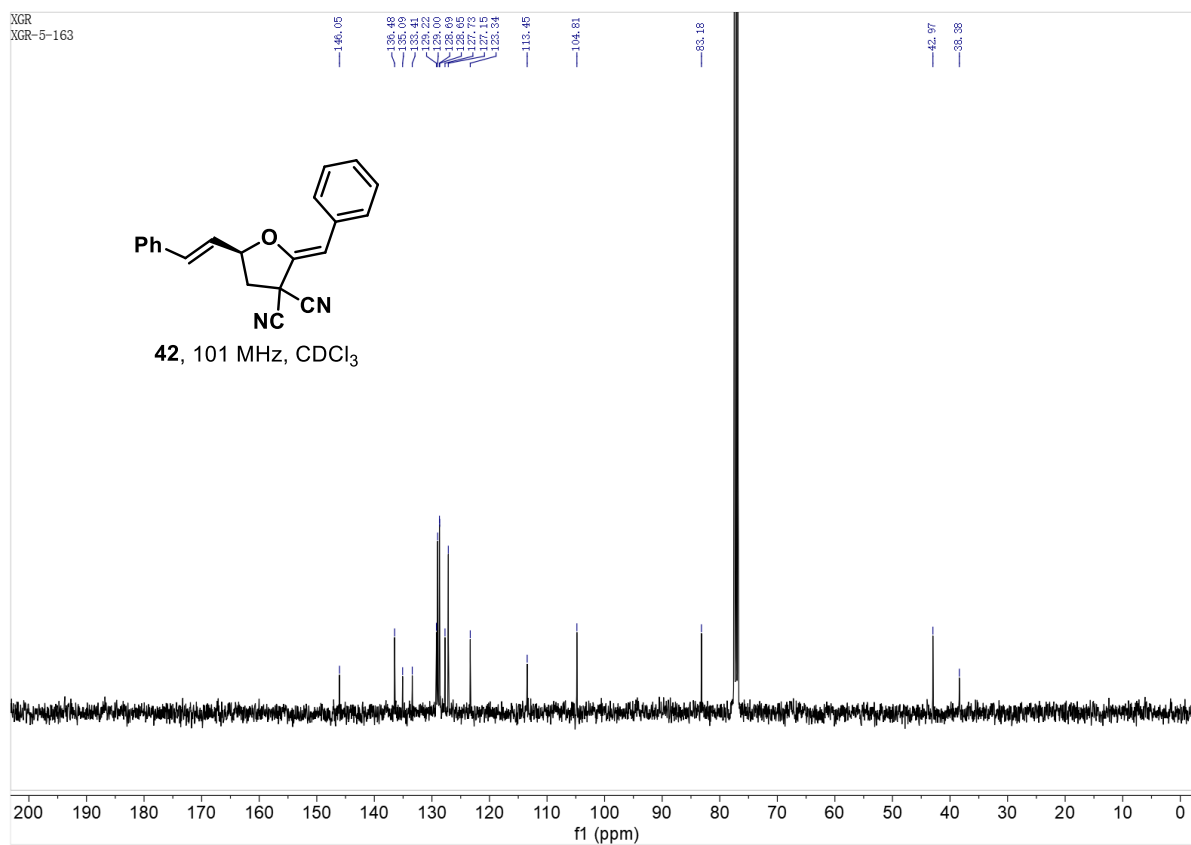

## VII. References

1. Clark Still, W.; Kahn, M.; Mitra, A., Rapid Chromatographic Technique for Preparative Separations with Moderate Resolution. *J. Org. Chem.* **1978**, *43*, 2923-2925.
2. McLaughlin, C.; Slawin, A. M. Z.; Smith, A. D., Base-free Enantioselective C(1)-Ammonium Enolate Catalysis Exploiting Aryloxides: A Synthetic and Mechanistic Study. *Angew. Chem. Int. Ed.* **2019**, *58* (42), 15111-15119.
3. Liu, Y.; Xiao, G.; Bai, Z.; Sa, Y.; Yang, M.; Kong, D., Asymmetric Deoxygenative Formal [3+2] Cycloaddition of Carboxylic Acids and Vinylcyclopropanes. *J. Am. Chem. Soc.*, **2025**, *147* (32), 28564-28569.
